# Supplementary material for: Squaramide-Catalyzed Asymmetric Mannich Reaction between 1,3-Dicarbonyl Compounds and Pyrazolinone Ketimines: A Pathway to Enantioenriched 4-Pyrazolyl- and 4-Isoxazolyl-4-aminopyrazolone Derivatives
Source: MDPI journal article supplement (doi:10.3390/molecules27206983), 2022-10-17
Supplement: s1 [file s1]

## Supplementary Material

**Squaramide-catalyzed asymmetric Mannich reaction between 1,3-dicarbonyl compounds and pyrazolinone ketimines: a pathway to enantioenriched 4-pyrazolyl- and 4-isoxazolyl-4-aminopyrazolone derivatives.**

Marta Gil-Ordóñez,<sup>1</sup> Camille Aubry,<sup>1</sup> Cristopher Niño,<sup>1</sup> Alicia Maestro<sup>1\*</sup> and José M. Andrés<sup>1\*</sup>

<sup>1</sup>GIR SintACat, Instituto CINQUIMA and Departamento de Química Orgánica, Facultad de Ciencias, Universidad de Valladolid, Paseo de Belén 7, 47011-Valladolid, Spain.

E-mail: [alicia.maestro@uva.es](mailto:alicia.maestro@uva.es); [jmandres@uva.es](mailto:jmandres@uva.es)

### List of contents

|                                                                        |     |
|------------------------------------------------------------------------|-----|
| 1. Synthesis of bifunctional squaramides <b>C2</b> and <b>C8</b> ..... | S2  |
| 2. NMR Spectra for New Compounds .....                                 | S5  |
| 3. HPLC Profiles of the isolated compounds.....                        | S31 |

## 1. Synthesis of bifunctional squaramides C2 and C8.

### 1.1. Preparation of squaramide organocatalyst C2.

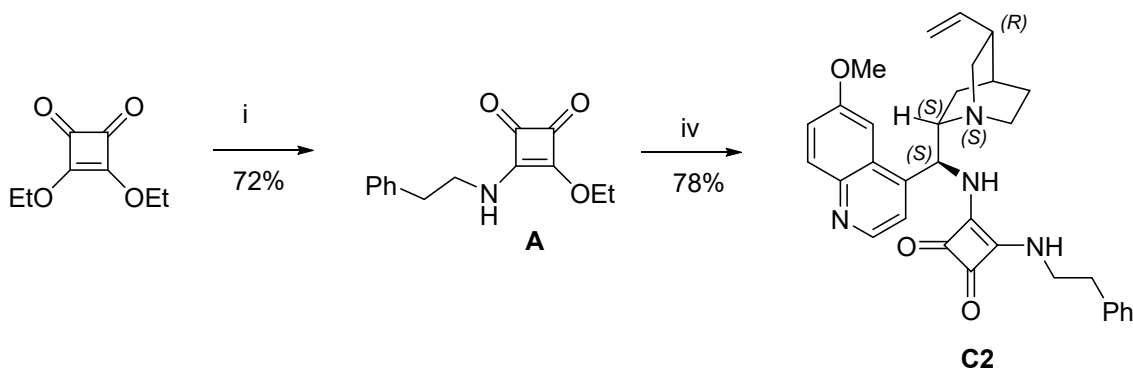

### 3-Ethoxy-4-(phenethylamino)cyclobut-3-ene-1,2-dione (A).

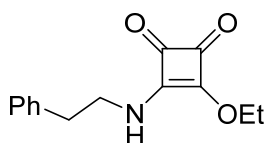

To a solution of diethyl squarate (955 mg, 5.60 mmol) in  $\text{CH}_2\text{Cl}_2$  (6 mL) was added a 2-phenylethan-1-amine (712 mg, 5.88 mmol, 1.05 equiv) and the mixture was stirred at room temperature for 48 h. The reaction mixture was concentrated and purified by column chromatography on silica gel (Hexane/EtOAc = 1:1) to afford the desired product as a white solid: 989 mg (4.03 mmol, 72% yield). Mp 104-105 °C.  **$^1\text{H-NMR}$**  (500 MHz,  $\text{CDCl}_3$ )  $\delta$  7.31 (m, 2H,  $\underline{\text{H}}_{\text{ar}}$ ), 7.25 (m, 1H,  $\underline{\text{H}}_{\text{ar}}$ ), 7.18 (m, 2H,  $\underline{\text{H}}_{\text{ar}}$ ), 6.71 (br s, 1H,  $\underline{\text{NH}}$ ), 4.73 (q,  $J = 7.1$  Hz, 2H,  $\underline{\text{CH}}_2\text{CH}_3$ ), 3.69 (m, 2H,  $\underline{\text{CH}}_2\text{CH}_2$ ), 2.92 (t,  $J = 7.0$  Hz, 2H,  $\underline{\text{CH}}_2\text{CH}_2$ ), 1.45 (t,  $J = 7.2$  Hz, 3H,  $\underline{\text{CH}}_3$ ).  **$^{13}\text{C-NMR}$**  (101 MHz,  $\text{CDCl}_3$ ):  $\delta$  189.6 ( $\underline{\text{C}}=\text{O}$ ), 182.6 ( $\underline{\text{C}}=\text{O}$ ), 177.6 ( $\underline{\text{C}}=\text{C}$ ), 172.3 ( $\underline{\text{C}}=\text{C}$ ), 137.4 ( $\underline{\text{C}}_{\text{ar}}$ ), 128.9 ( $\underline{\text{C}}_{\text{Har}}$ ), 128.7 ( $\underline{\text{C}}_{\text{Har}}$ ), 126.9 ( $\underline{\text{C}}_{\text{Har}}$ ), 69.7 ( $\underline{\text{CH}}_2\text{CH}_3$ ), 46.1 ( $\underline{\text{CH}}_2\text{N}$ ), 37.0 ( $\underline{\text{CH}}_2\text{Ph}$ ), 15.8 ( $\underline{\text{CH}}_3$ ) ppm. **IR** (ATR): 3255, 3044, 3024, 2937, 1807, 1690, 1596, 1522, 1334, 1116, 1059, 1019, 838, 751, 691  $\text{cm}^{-1}$ . **HRMS** (ESI-QTOF)  $m/z$ :  $[\text{M}+\text{H}]^+$  Calcd. For  $\text{C}_{14}\text{H}_{16}\text{NO}_3$  246.1125; Found 246.1129.

### 3-(((*S*)-(6-methoxyquinolin-4-yl)((1*S*,2*S*,4*S*,5*R*)-5-vinylquinuclidin-2-yl)methyl)amino)-4-(phenethylamino)cyclobut-3-ene-1,2-dione (C2).

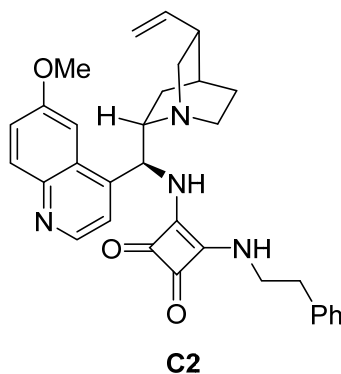

To a stirred solution of 9-amino-(9-deoxy)epiquinine (162 mg, 0.5 mmol) in methanol (6 mL) was added 3-ethoxy-4-(phenethylamino)cyclobut-3-ene-1,2-dione (**1**) (123 g, 0.5 mmol). After stirring for 48 h, a white precipitate formed, which was filtered and washed with methanol (3 x 5 mL) yielding the squaramide **IV** (204 mg, 0.39 mmol, 78%). Colorless solid. Mp 279-280 °C.  $[\alpha]_{\text{D}}^{25} = +4.52$  ( $c = 0.4$ , DMSO). **<sup>1</sup>H NMR** (500 MHz, DMSO- $d_6$ )  $\delta$  8.77 (d,  $J = 4.6$  Hz, 1H, NH), 7.95 (d,  $J = 9.2$  Hz, 1H, Har), 7.83 (br s, 1H, Har), 7.77 (br s, 1H, Har), 7.55 (br s, 1H, Har), 7.42 (dd,  $J = 9.2, 2.6$  Hz, 2H, Har), 7.17 (m, 5H, Har), 5.94 (m, 2H, CH=CH and NH), 4.98 (m, 2H, CH<sub>2</sub>=CH), 3.90 (s, 3H, CH<sub>3</sub>O), 3.70 (m, 2H, CH<sub>2</sub>NH), 3.37 (m, 1H), 3.28 (m, 1H), 3.16 (dd,  $J = 13.6, 10.0$  Hz, 1H), 2.78 (br s, 2H), 2.61 (m, 2H), 2.25 (br s, 1H), 1.54 (br s, 1H), 1.47 (br s, 2H), 0.56 (br s, 1H) ppm. **<sup>13</sup>C-NMR** (101 MHz, DMSO- $d_6$ ):  $\delta$  182.8 (CO), 182.4 (CO), 168.1 (C=C), 167.0 (C=C), 158.3 (Car), 148.2 (CHar), 144.7 (Car), 144.1 (Car), 142.7 (CHar), 138.8 (Car), 131.9 (CHar), 129.1 (CHar), 128.8 (CHar), 126.7 (CHar), 122.3 (CHar), 114.7 (CH<sub>2</sub>=CH), 102.1 (CHar), 59.1 (CHN), 56.2 (CH<sub>2</sub>N), 56.1 (CH<sub>3</sub>O), 45.0 (CH<sub>2</sub>N), 40.5 (CH<sub>2</sub>), 39.8 (CHCH=CH<sub>2</sub>), 37.3 (CH<sub>2</sub>Ph), 27.8 (CH<sub>2</sub>), 26.7 (CH<sub>2</sub>) ppm. **IR** (ATR): 3159, 2935, 1800, 1638, 1567, 1360, 1240, 1033, 840, 747, 700  $\text{cm}^{-1}$ . **HRMS** (ESI-QTOF)  $m/z$ :  $[M+H]^+$  Calcd. For  $\text{C}_{32}\text{H}_{35}\text{N}_4\text{O}_3$  523.2704; Found 523.2708.

## 1.2. Preparation of squaramide organocatalyst C8.

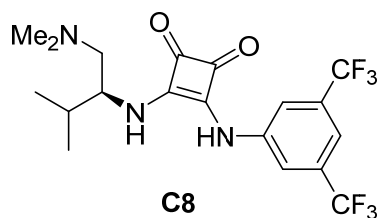

To a stirred solution of (S)-*N*<sup>1</sup>,*N*<sup>1</sup>,3-trimethylbutane-1,2-diamine<sup>1</sup> (169 mg, 1.3 mmol) in CH<sub>2</sub>Cl<sub>2</sub> (5 mL) was added 3-((3,5-bis(trifluoromethyl)phenyl)amino)-4-ethoxycyclobutane-1,2-dione (459 mg, 1.3 mmol). After stirring for 48 h, a precipitate was formed, which was filtered and washed with diethyl ether, yielding the catalyst **C8** as a white solid (420 mg, 0.96 mmol, 74% yield). Mp 208-210 °C.  $[\alpha]_D^{25} = -11.6$  (c = 0.4, acetone). **<sup>1</sup>H-NMR** (400 MHz, DMSO-*d*<sub>6</sub>)  $\delta$  8.06 (s, 2H, Har), 7.78 (br s, 1H, NH), 7.62 (s, 1H, Har), 4.09 (br s, 1H, CHN), 2.46 (m, 1H, CHHNMe<sub>2</sub>), 2.28 (m, 1H, CHHNMe<sub>2</sub>), 2.15 (s, 6H, CH<sub>3</sub>N), 1.84 (m, 1H, CHMe<sub>2</sub>), 0.89 (d, J = 6.5 Hz, 3H, CH<sub>3</sub>CH), 0.87 (d, J = 6.5 Hz, 3H, CH<sub>3</sub>CH) ppm. **<sup>13</sup>C-NMR** (101 MHz, DMSO-*d*<sub>6</sub>):  $\delta$  185.0 (CO), 180.6 (CO), 170.5 (C=C), 162.6 (C=C), 141.6 (Car), 131.8 (q, J = 32.9 Hz, CCF<sub>3</sub>), 123.6 (q, J = 272.8 Hz, CF<sub>3</sub>), 118.5 (CHar), 115.1 (CHar), 61.7 (CH<sub>2</sub>NMe<sub>2</sub>), 57.7 (CHN), 45.7 (CH<sub>3</sub>N), 31.1 (CHMe<sub>2</sub>), 19.7 (CH<sub>3</sub>CH), 17.1 (CH<sub>3</sub>CH) ppm. **<sup>19</sup>F-NMR** (376 MHz, CDCl<sub>3</sub>):  $\delta$  -61.8 ppm. **IR** (ATR): 3135, 2948, 1798, 1662, 1578, 1542, 1457, 1377, 1274, 1124, 940, 882, 743, 699, 685 cm<sup>-1</sup>. **HRMS** (ESI-QTOF) *m/z*: [M+H]<sup>+</sup> Calcd. For C<sub>19</sub>H<sub>22</sub>F<sub>6</sub>N<sub>3</sub>O<sub>2</sub> 438,1611; Found 438,1614.

<sup>1</sup> J. M. Andrés, R. Manzano, R. Pedrosa. *Chem. Eur. J.* **2008**, *14*, 5116.

## 2. NMR Spectra for New Compounds

### 3-Ethoxy-4-(phenethylamino)cyclobut-3-ene-1,2-dione (A).

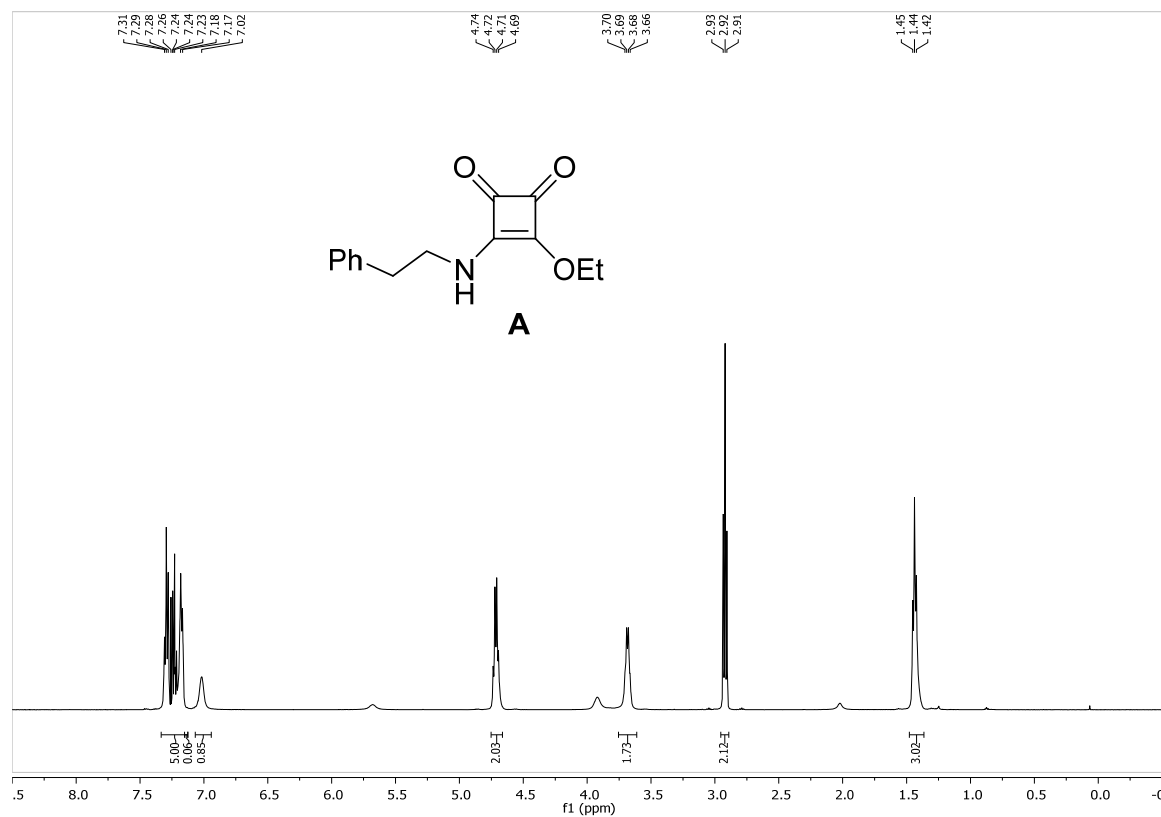

Figure S1. <sup>1</sup>H NMR spectrum of A (CDCl<sub>3</sub>, 500 MHz).

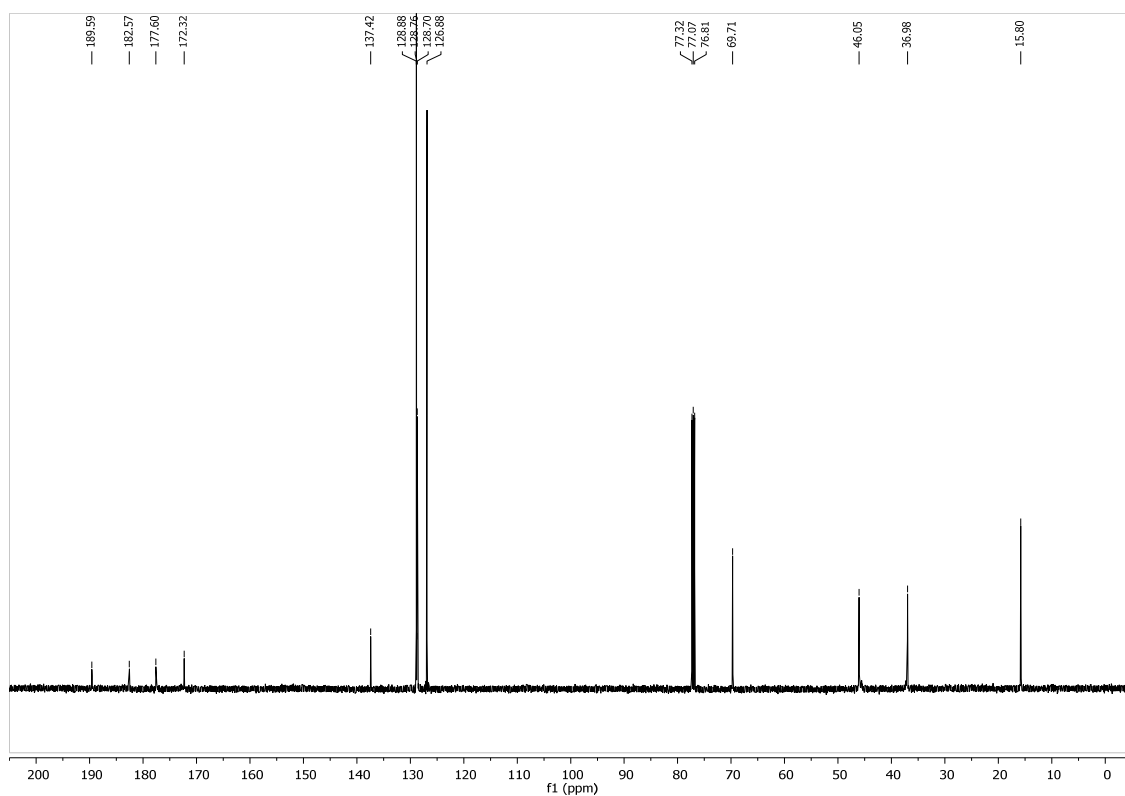

Figure S2. <sup>13</sup>C NMR spectrum of A (CDCl<sub>3</sub>, 101 MHz).

**3-(((S)-(6-Methoxyquinolin-4-yl)((1S,2S,4S,5R)-5-vinylquinuclidin-2-yl)methyl)amino)-4-(phenethylamino)cyclobut-3-ene-1,2-dione (C2).**

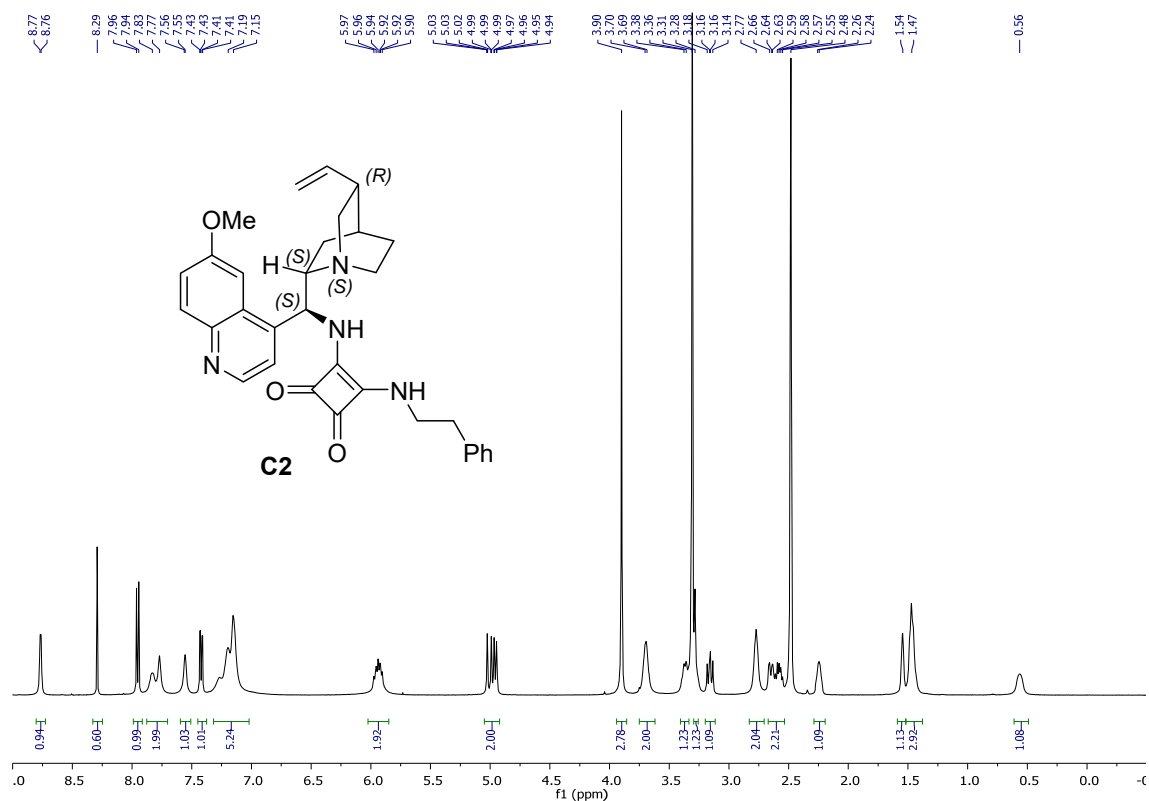

**Figure S3.** <sup>1</sup>H NMR spectrum of **C2** (DMSO-d<sub>6</sub>, 500 MHz).

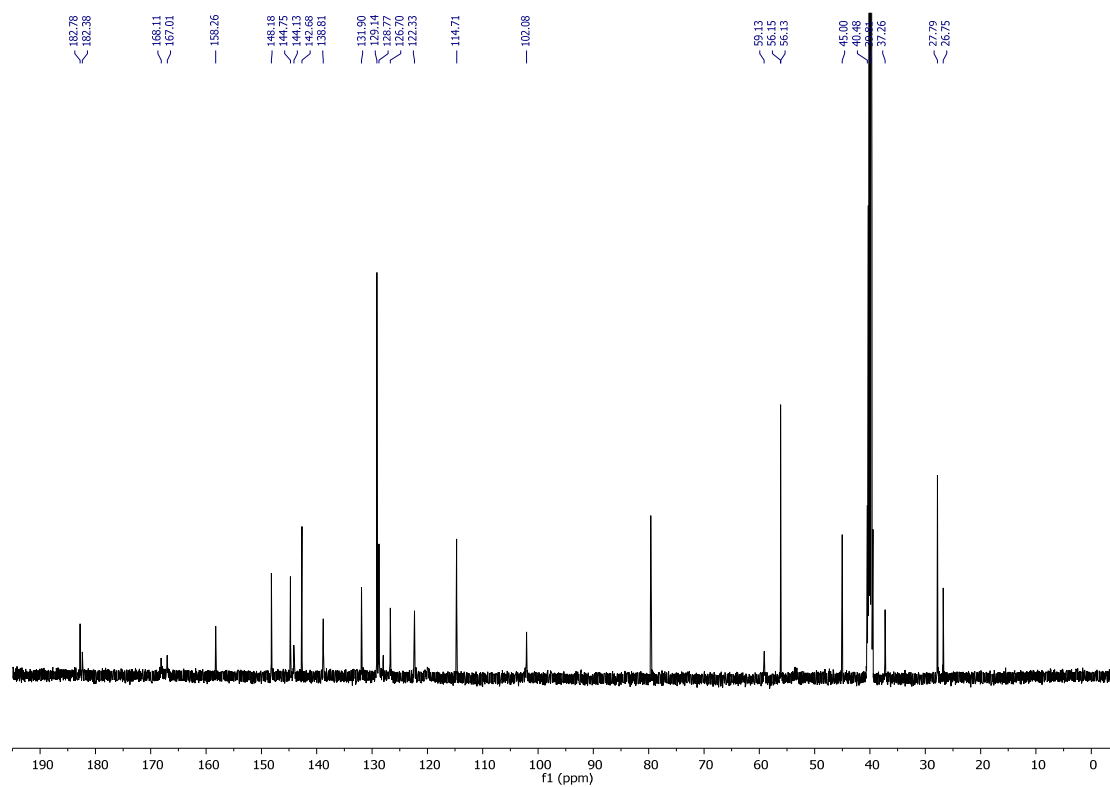

**Figure S4.** <sup>13</sup>C NMR spectrum of **C2** (DMSO-d<sub>6</sub>, 101 MHz).

**(S)-3-((3,5-Bis(trifluoromethyl)phenyl)amino)-4-((1-(dimethylamino)-3-methylbutan-2-yl)amino)cyclobut-3-ene-1,2-dione (C8).**

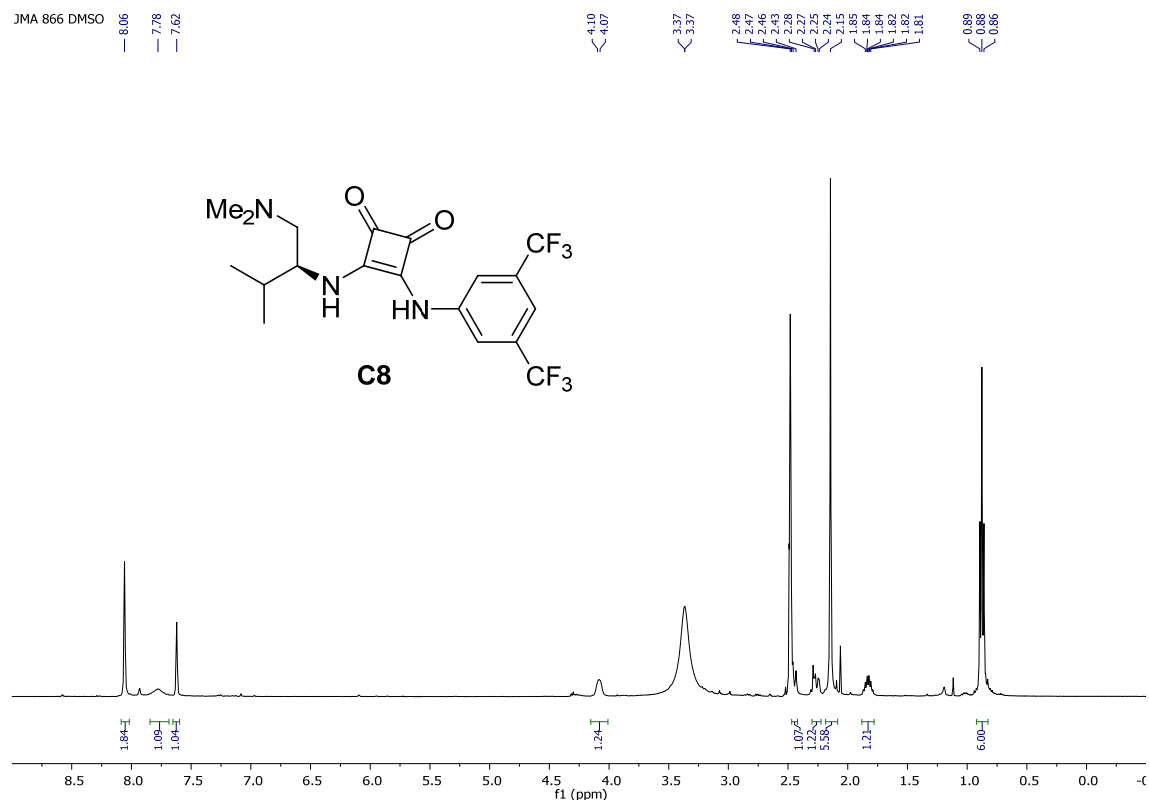

**Figure S5.** <sup>1</sup>H NMR spectrum of **C8** (DMSO-d<sub>6</sub>, 400 MHz).

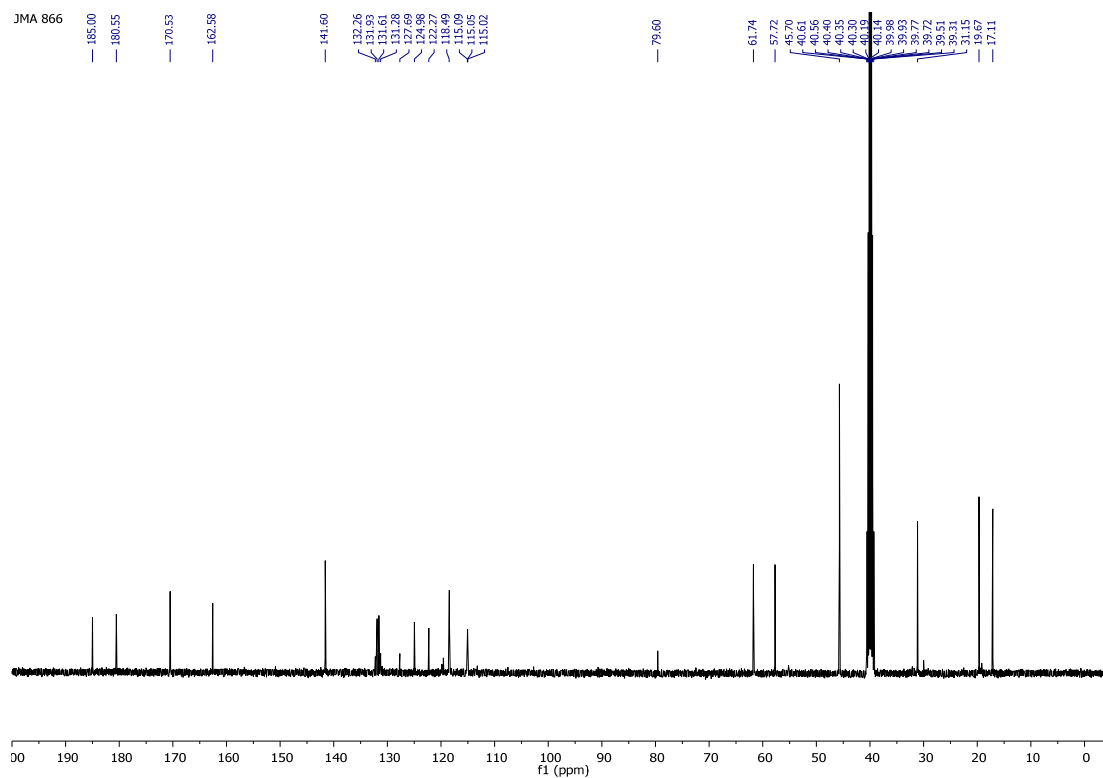

**Figure S6.** <sup>13</sup>C NMR spectrum of **C8** (DMSO-d<sub>6</sub>, 101 MHz).

***tert*-Butyl (S)-(4-(2,4-dioxopentan-3-yl)-3-methyl-5-oxo-1-phenyl-4,5-dihydro-1*H*-pyrazol-4-yl)carbamate (**3a**).**

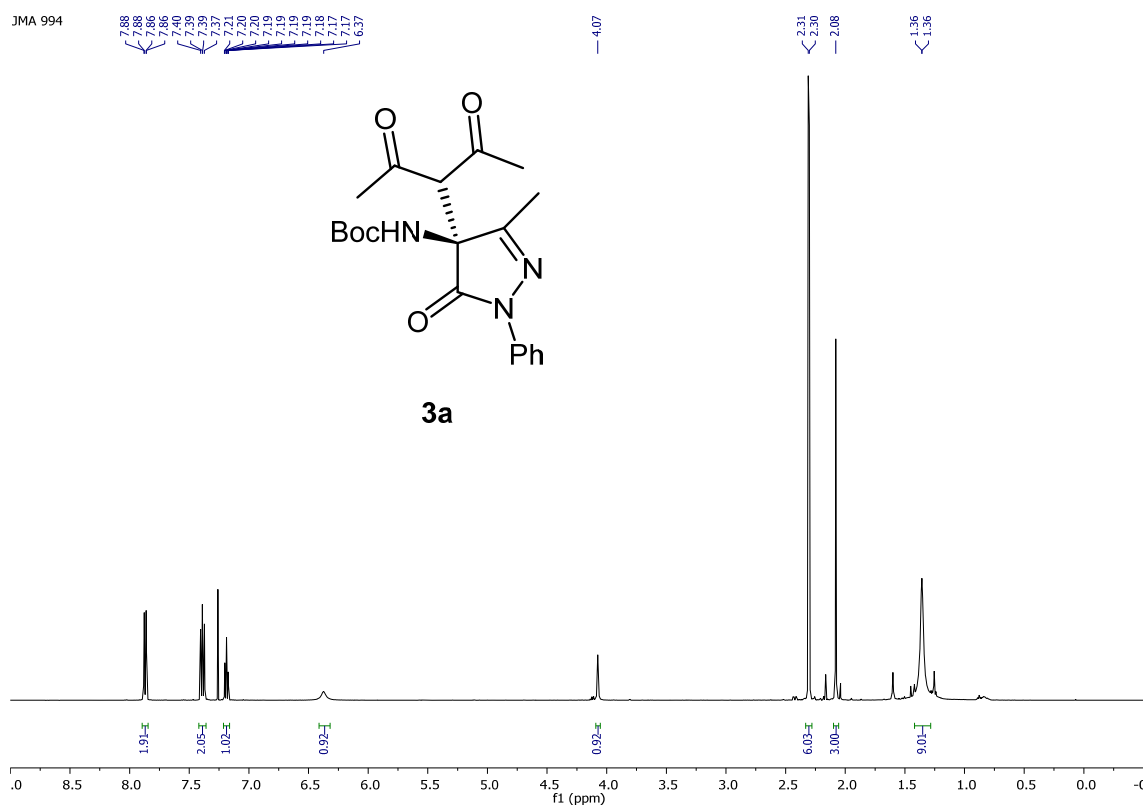

**Figure S7.**  $^1\text{H}$  NMR spectrum of **3a** ( $\text{CDCl}_3$ , 500 MHz).

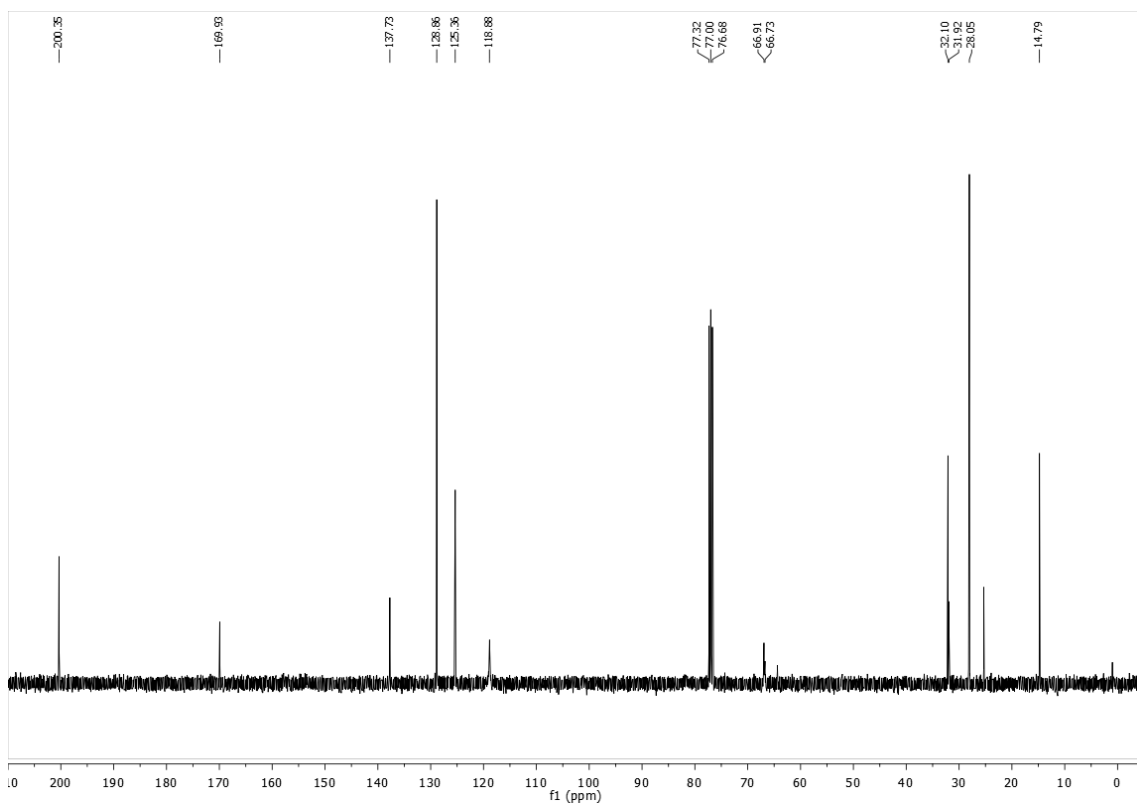

**Figure S8.**  $^{13}\text{C}$  NMR spectrum of **3a** ( $\text{CDCl}_3$ , 126 MHz).



***tert*-Butyl (S)-(4-(2,4-dioxopentan-3-yl)-3-ethyl-5-oxo-1-phenyl-4,5-dihydro-1*H*-pyrazol-4-yl)carbamate (**3b**).**

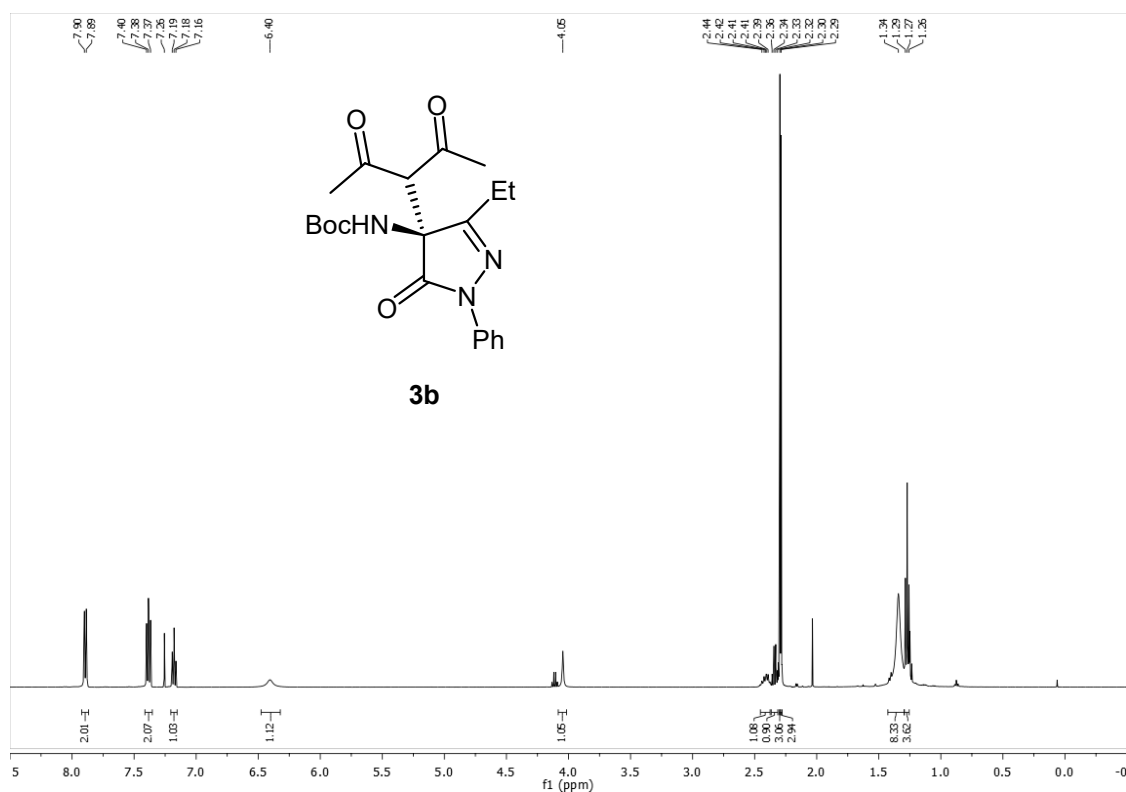

**Figure S9.**  $^1\text{H}$  NMR spectrum of **3b** ( $\text{CDCl}_3$ , 500 MHz).

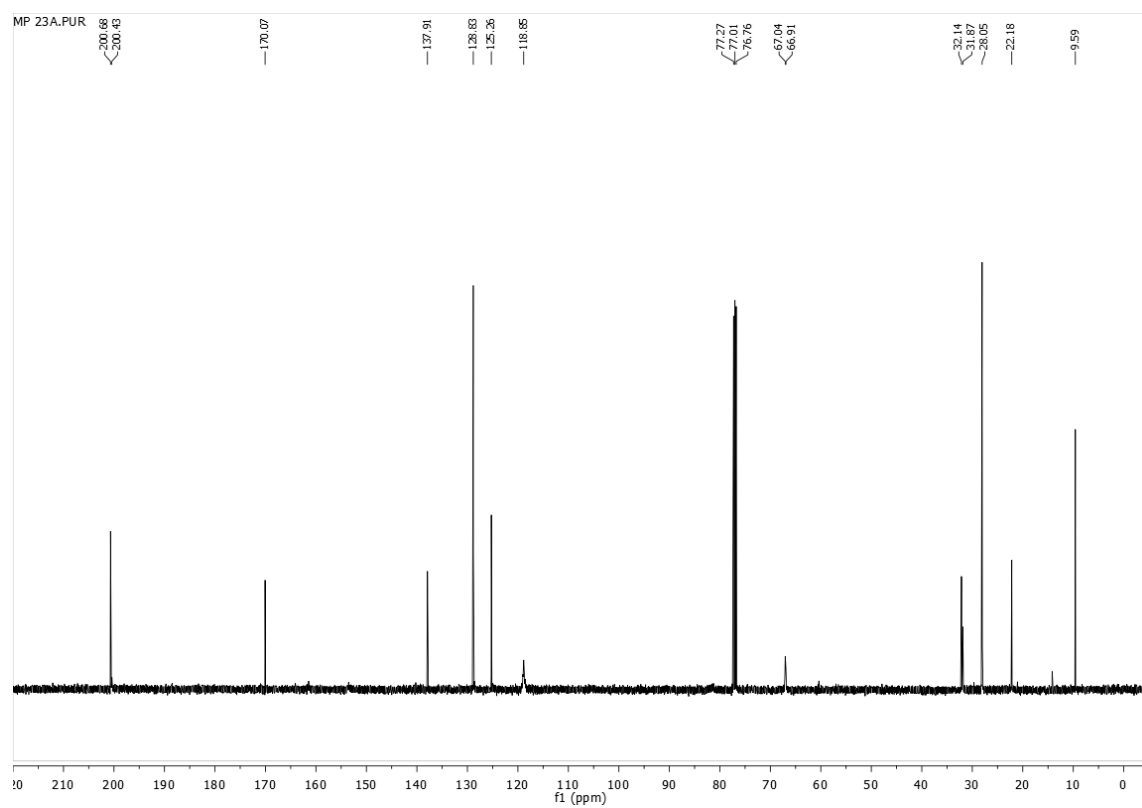

**Figure S10.**  $^{13}\text{C}$  NMR spectrum of **3b** ( $\text{CDCl}_3$ , 126 MHz).

[illegible]

13C NMR spectrum (CDCl<sub>3</sub>) of compound 10a. The x-axis is labeled 'f1 (ppm)' and ranges from 0 to 201.12. The spectrum shows several peaks, with the following chemical shifts labeled above them:

- 201.12
- 169.76
- 137.96
- 128.80
- 125.21
- 119.10
- 77.28
- 77.02
- 76.77
- 67.37
- 66.99
- 32.12
- 31.66
- 28.81
- 28.08
- 20.29

S10

*tert*-Butyl (S)-(4-(2,4-dioxopentan-3-yl)-5-oxo-1,3-diphenyl-4,5-dihydro-1*H*-pyrazol-4-yl)carbamate (**3e**).

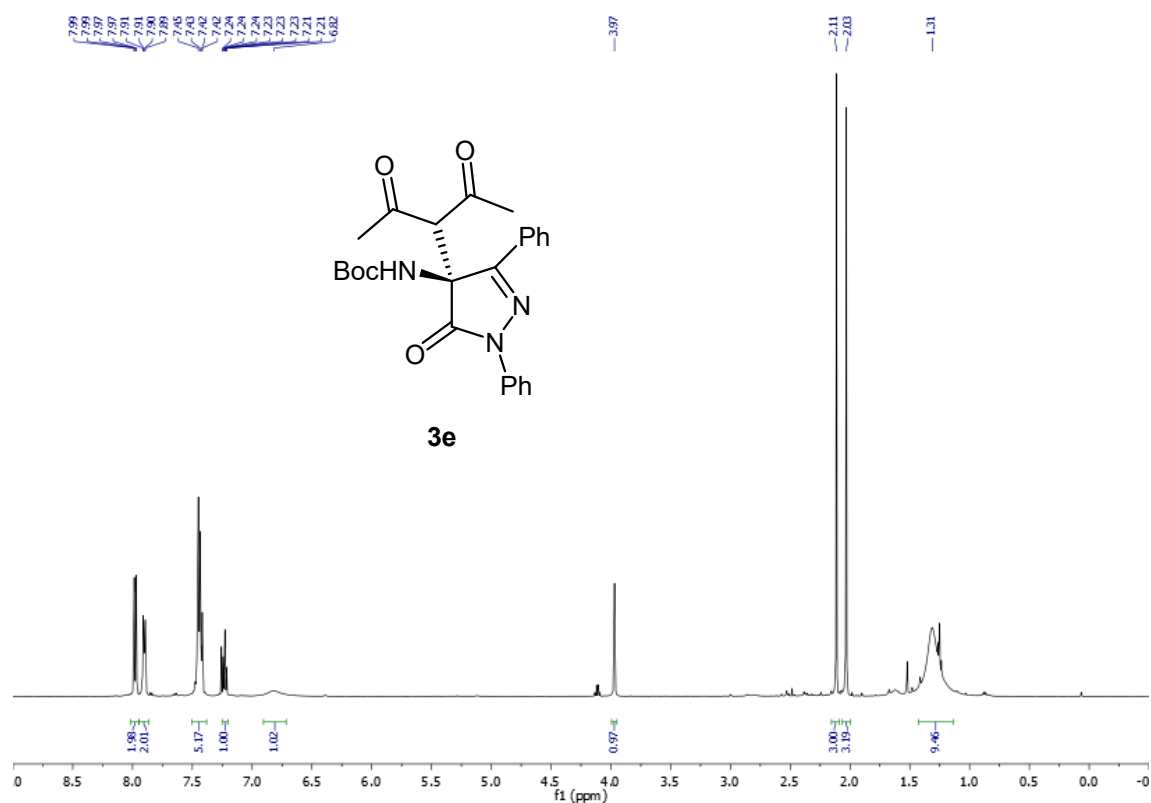

Figure S13.  $^1\text{H}$  NMR spectrum of **3e** ( $\text{CDCl}_3$ , 500 MHz).

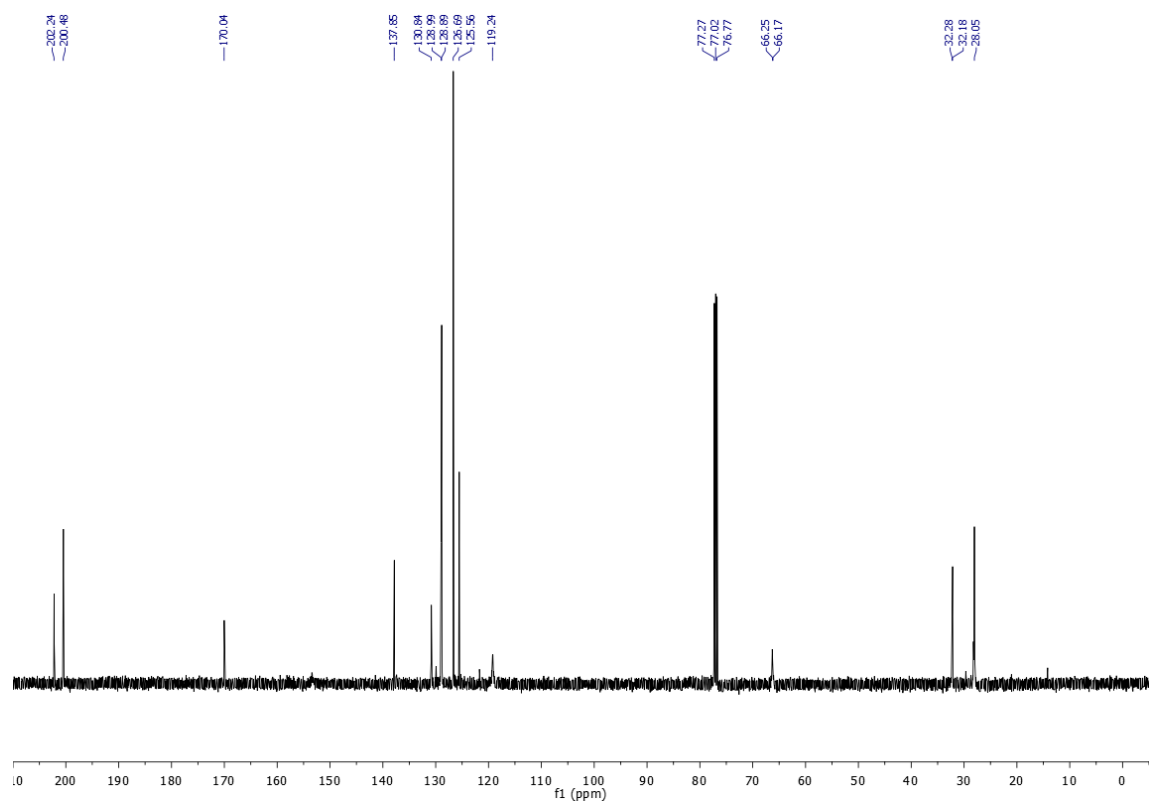

Figure S14.  $^{13}\text{C}$  NMR spectrum of **3e** ( $\text{CDCl}_3$ , 126 MHz).

***tert*-Butyl (S)-(1-(4-chlorophenyl)-4-(2,4-dioxopentan-3-yl)-3-methyl-5-oxo-4,5-dihydro-1*H*-pyrazol-4-yl)carbamate (3f).**

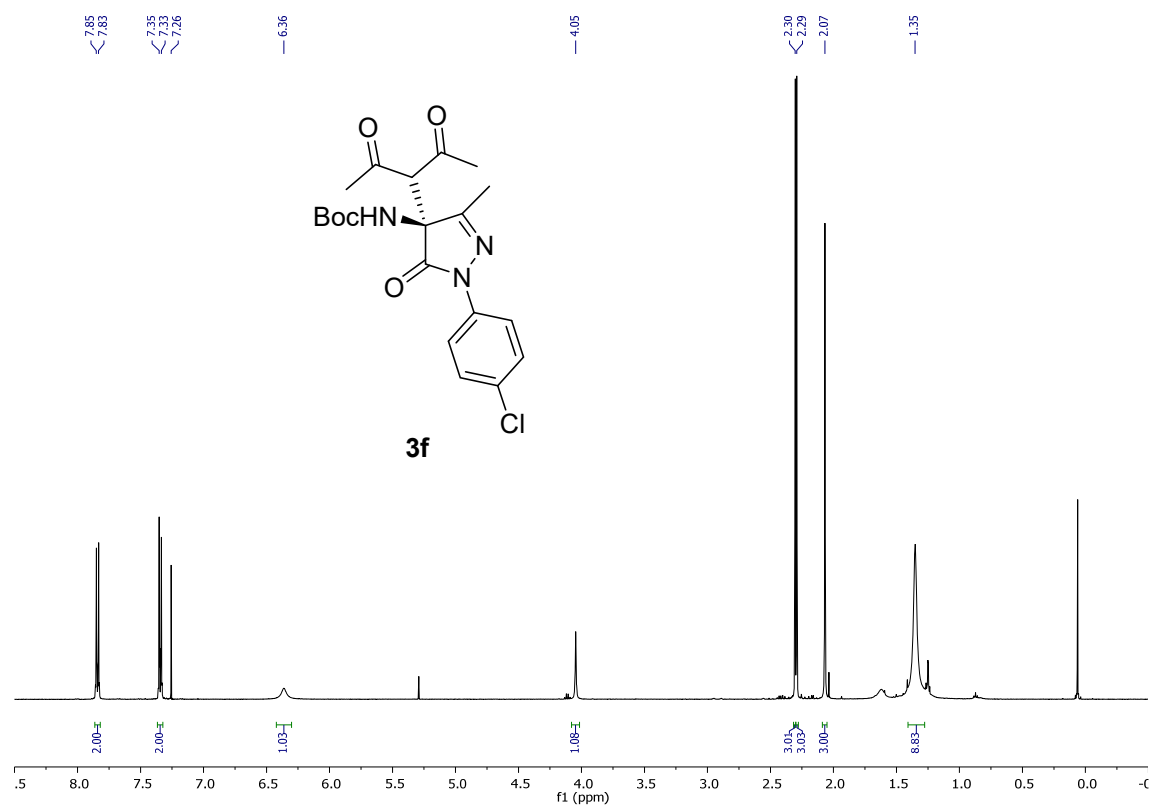

**Figure S15.** <sup>1</sup>H NMR spectrum of **3f** (CDCl<sub>3</sub>, 500 MHz).

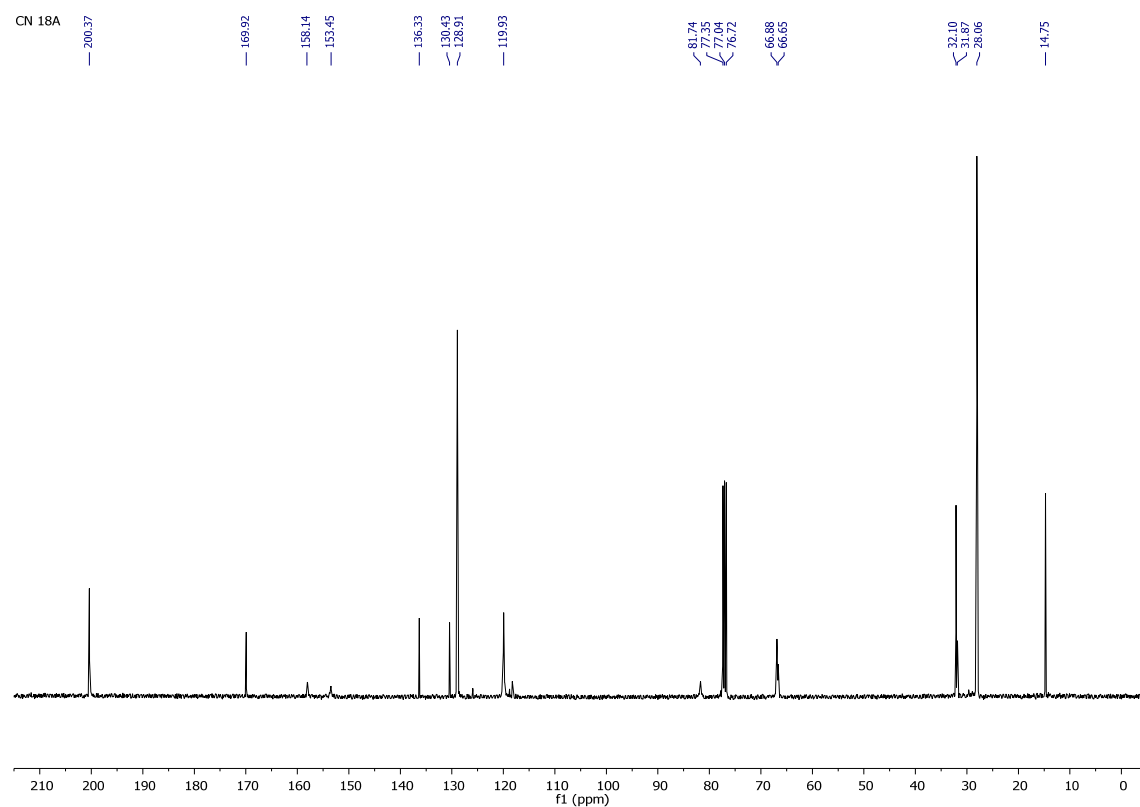

**Figure S16.** <sup>13</sup>C NMR spectrum of **3f** (CDCl<sub>3</sub>, 126 MHz).

***tert*-Butyl (S)-(4-(2,4-dioxopentan-3-yl)-3-methyl-5-oxo-1-(*p*-tolyl)-4,5-dihydro-1*H*-pyrazol-4-yl)carbamate (**3g**).**

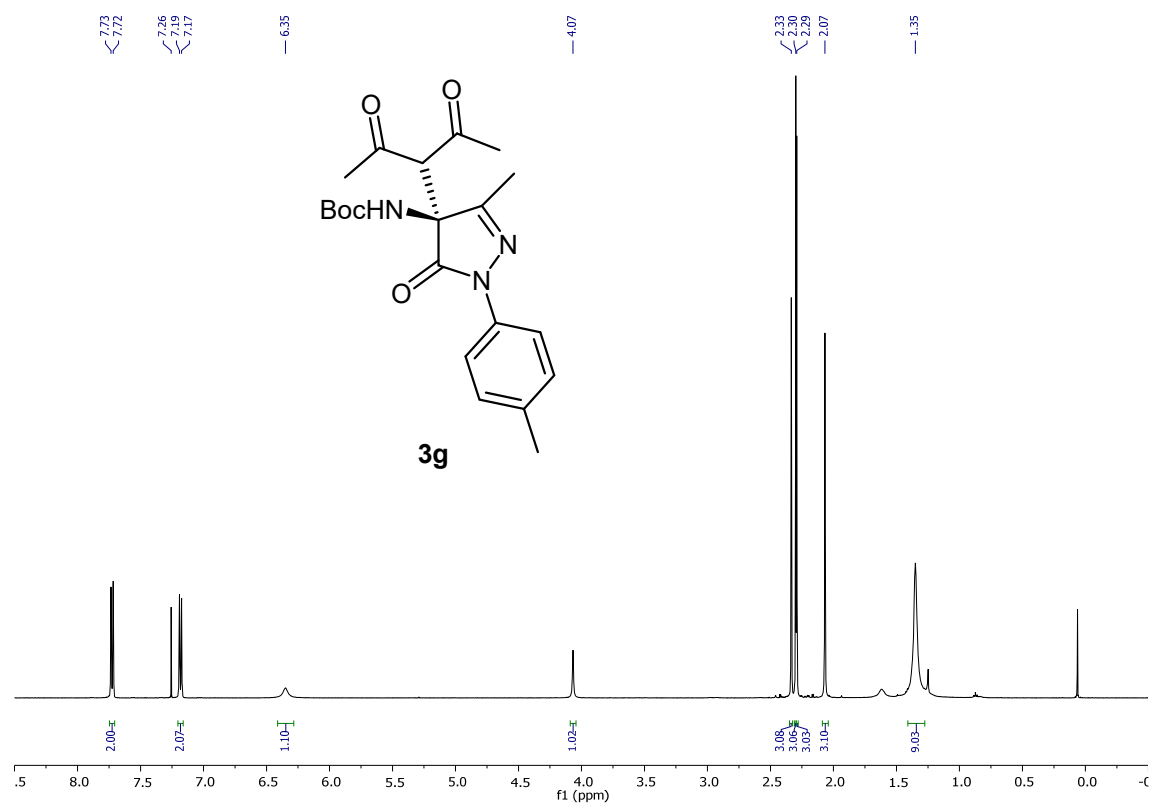

**Figure S17.**  $^1\text{H}$  NMR spectrum of **3g** ( $\text{CDCl}_3$ , 500 MHz).

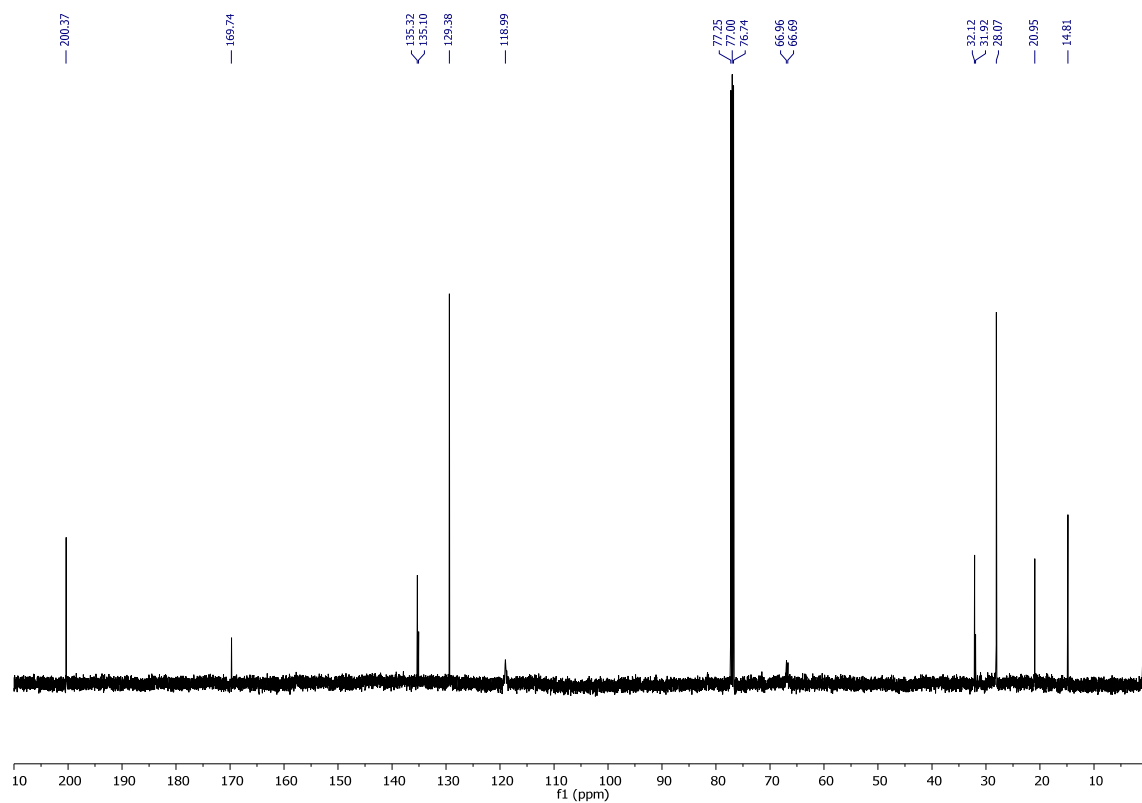

**Figure S18.**  $^{13}\text{C}$  NMR spectrum of **3g** ( $\text{CDCl}_3$ , 126 MHz).

***tert*-Butyl (S)-(4-(3,5-dioxoheptan-4-yl)-3-methyl-5-oxo-1-phenyl-4,5-dihydro-1H-pyrazol-4-yl)carbamate (3h).**

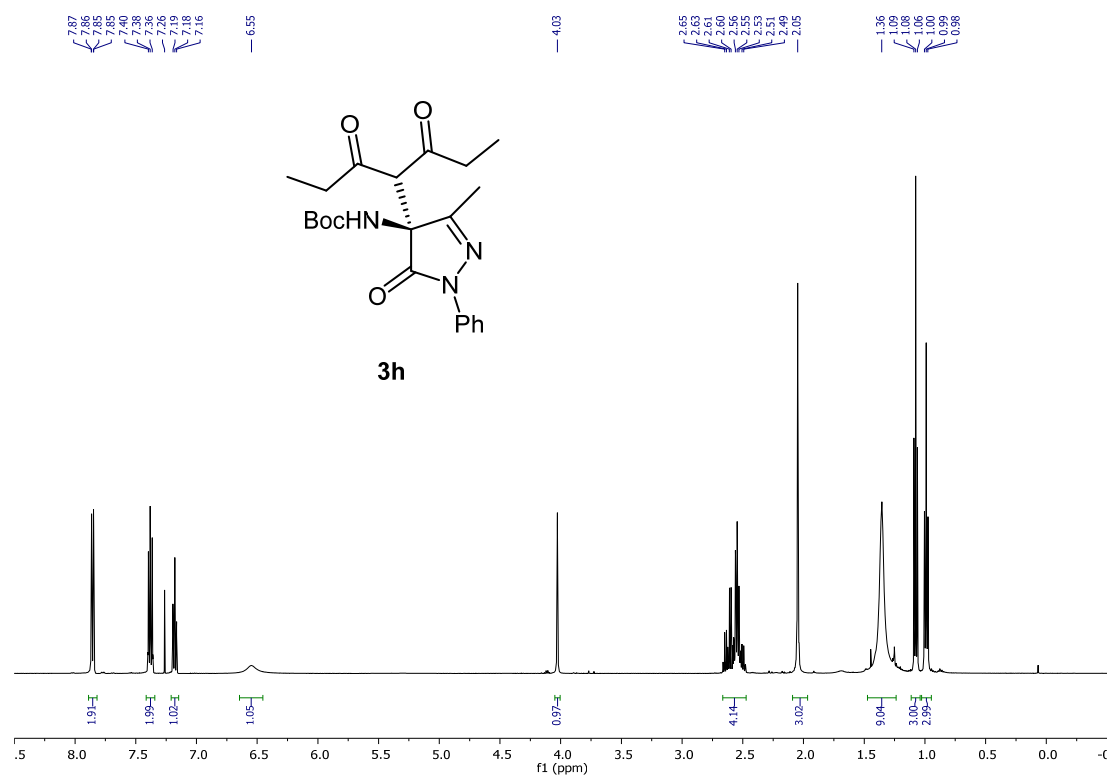

**Figure S19.** <sup>1</sup>H NMR spectrum of **3h** (CDCl<sub>3</sub>, 500 MHz).

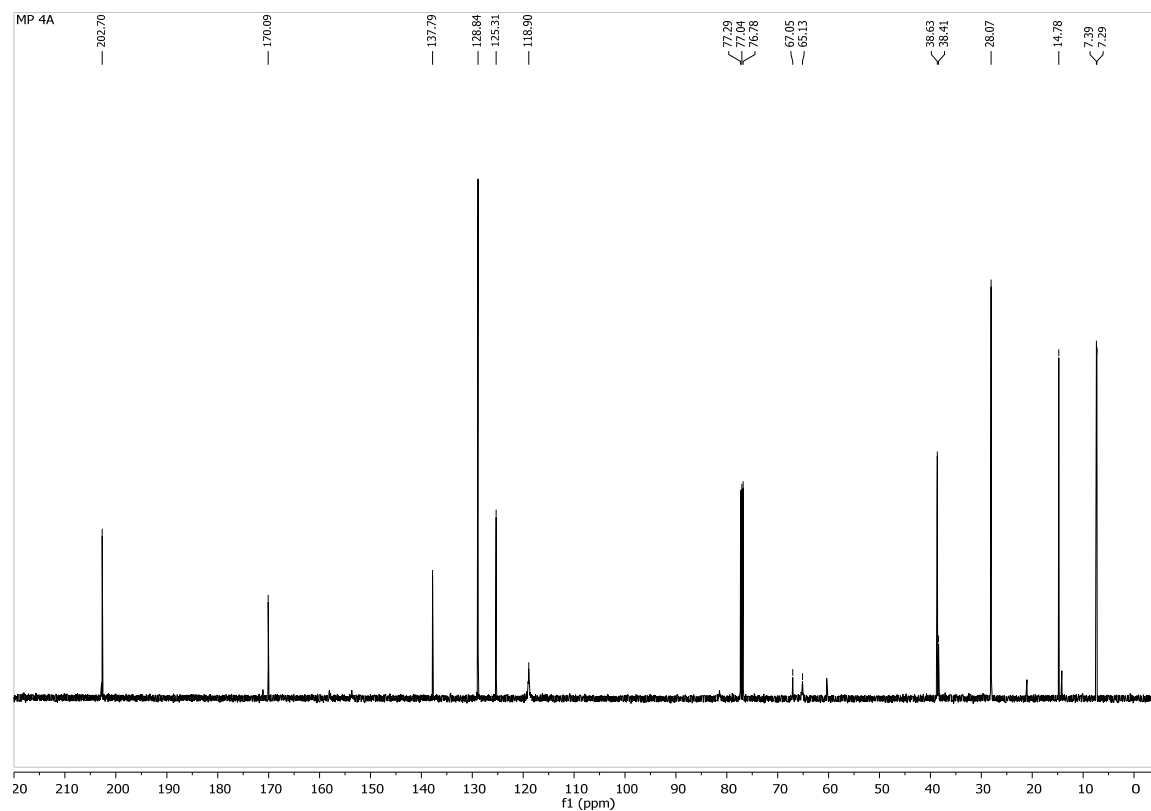

**Figure S20.** <sup>13</sup>C NMR spectrum of **3h** (CDCl<sub>3</sub>, 126 MHz).

***tert*-Butyl (S)-(4-(1,3-dioxo-1,3-diphenylpropan-2-yl)-3-methyl-5-oxo-1-phenyl-4,5-dihydro-1*H*-pyrazol-4-yl)carbamate (**3i**).**

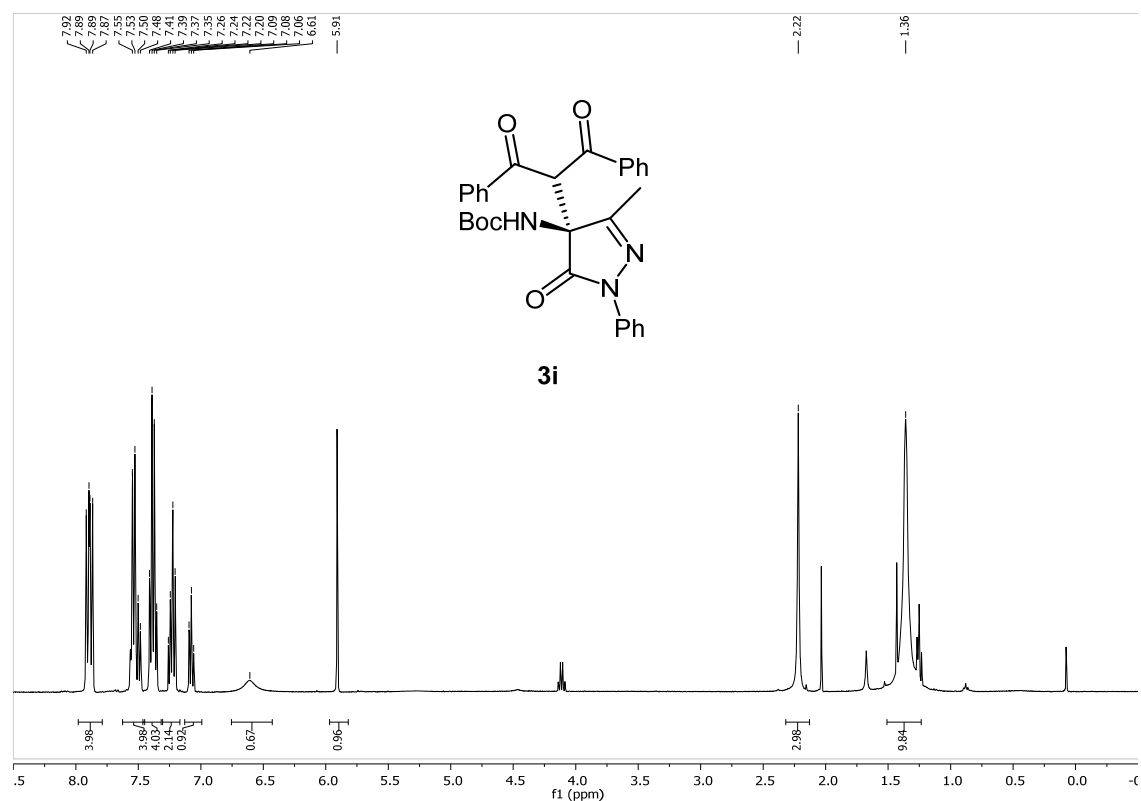

**Figure S21.**  $^1\text{H}$  NMR spectrum of **3i** ( $\text{CDCl}_3$ , 500 MHz).

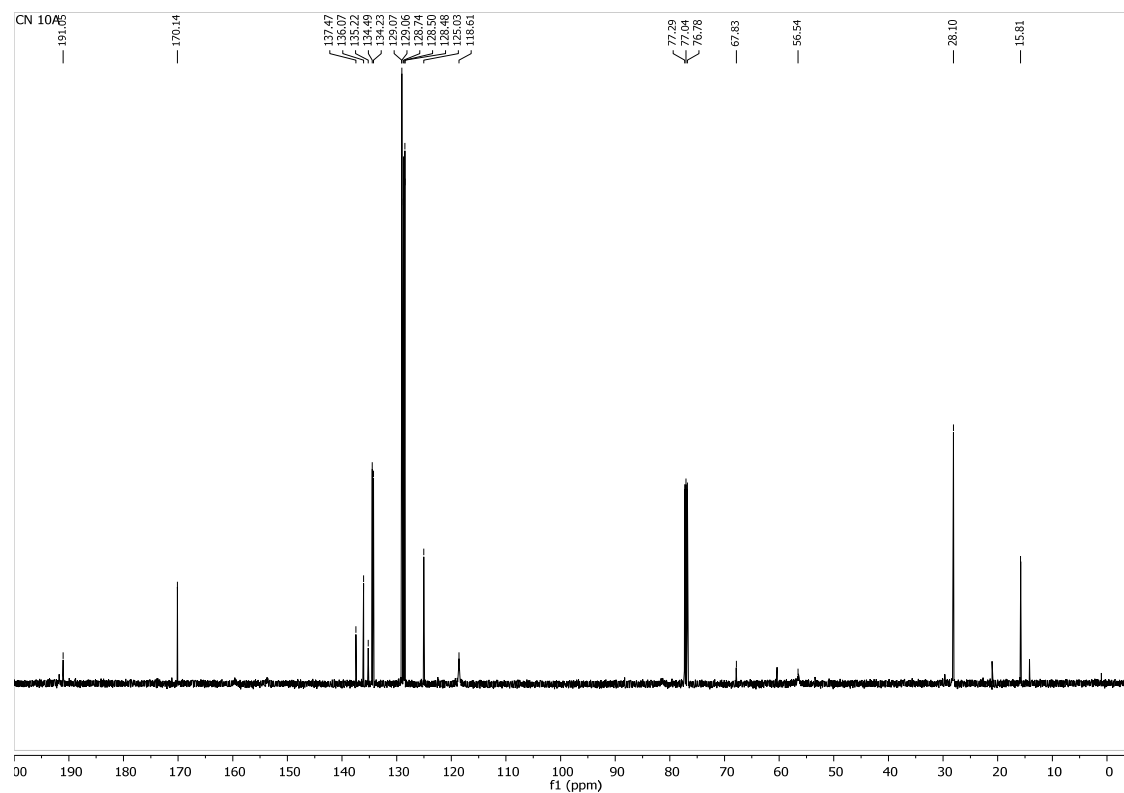

**Figure S22.**  $^{13}\text{C}$  NMR spectrum of **3i** ( $\text{CDCl}_3$ , 126 MHz).

***tert*-Butyl (S)-(4-(3,5-dioxoheptan-4-yl)-5-oxo-1,3-diphenyl-4,5-dihydro-1*H*-pyrazol-4-yl)carbamate (**3j**).**

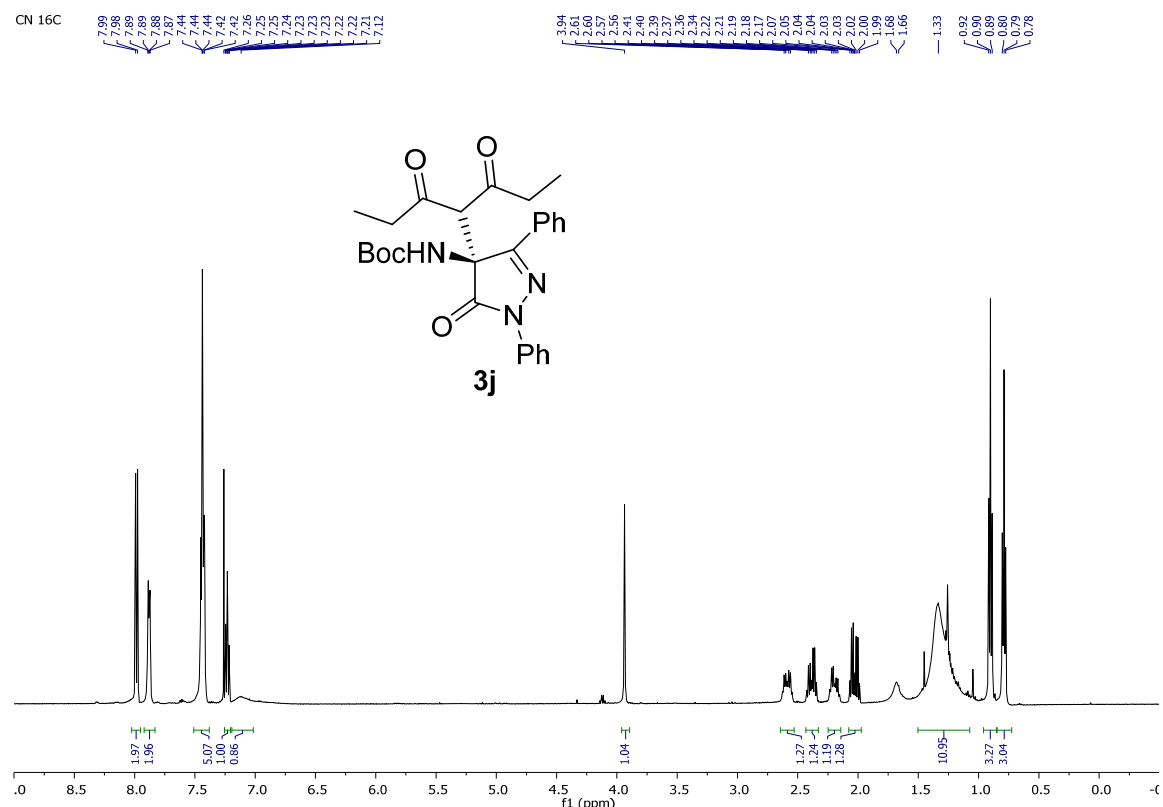

**Figure S23.** <sup>1</sup>H NMR spectrum of **3j** (CDCl<sub>3</sub>, 500 MHz).

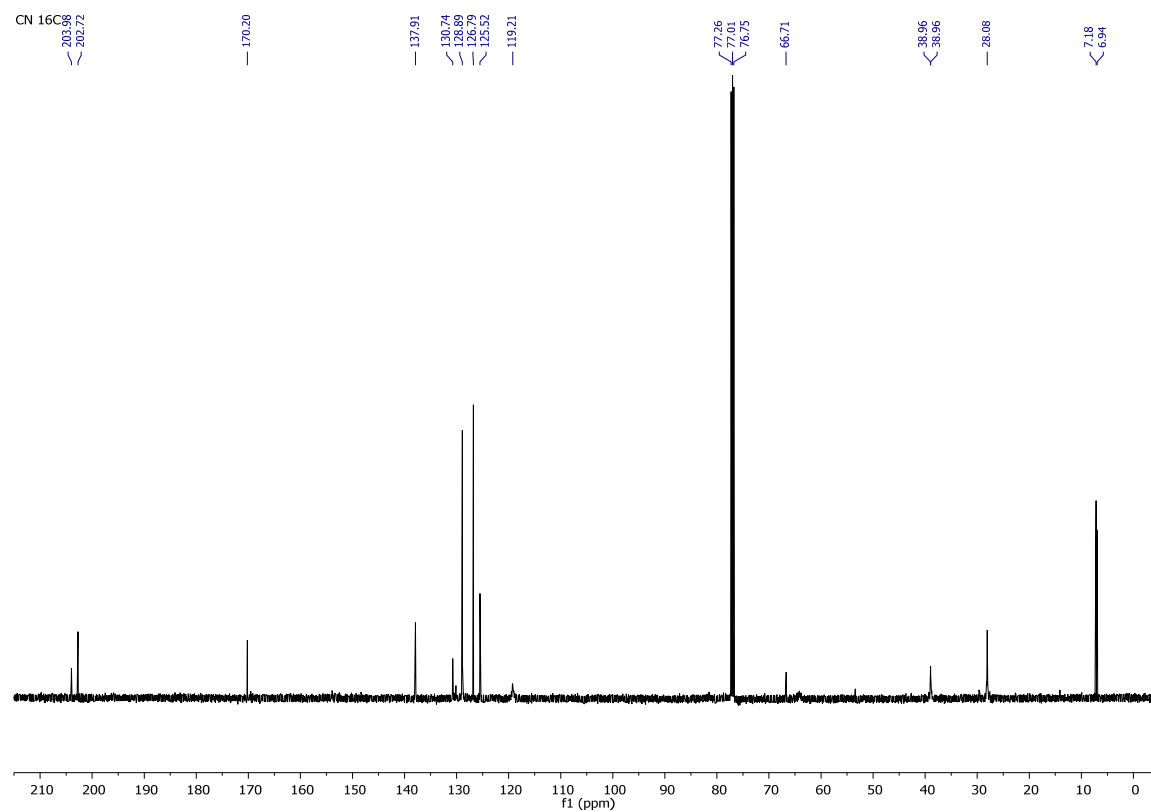

**Figure S24.** <sup>13</sup>C NMR spectrum of **3j** (CDCl<sub>3</sub>, 126 MHz).



***tert*-Butyl (S)-(4-(1,3-dioxo-1,3-diphenylpropan-2-yl)-5-oxo-1,3-diphenyl-4,5-dihydro-1*H*-pyrazol-4-yl)carbamate (3k).**

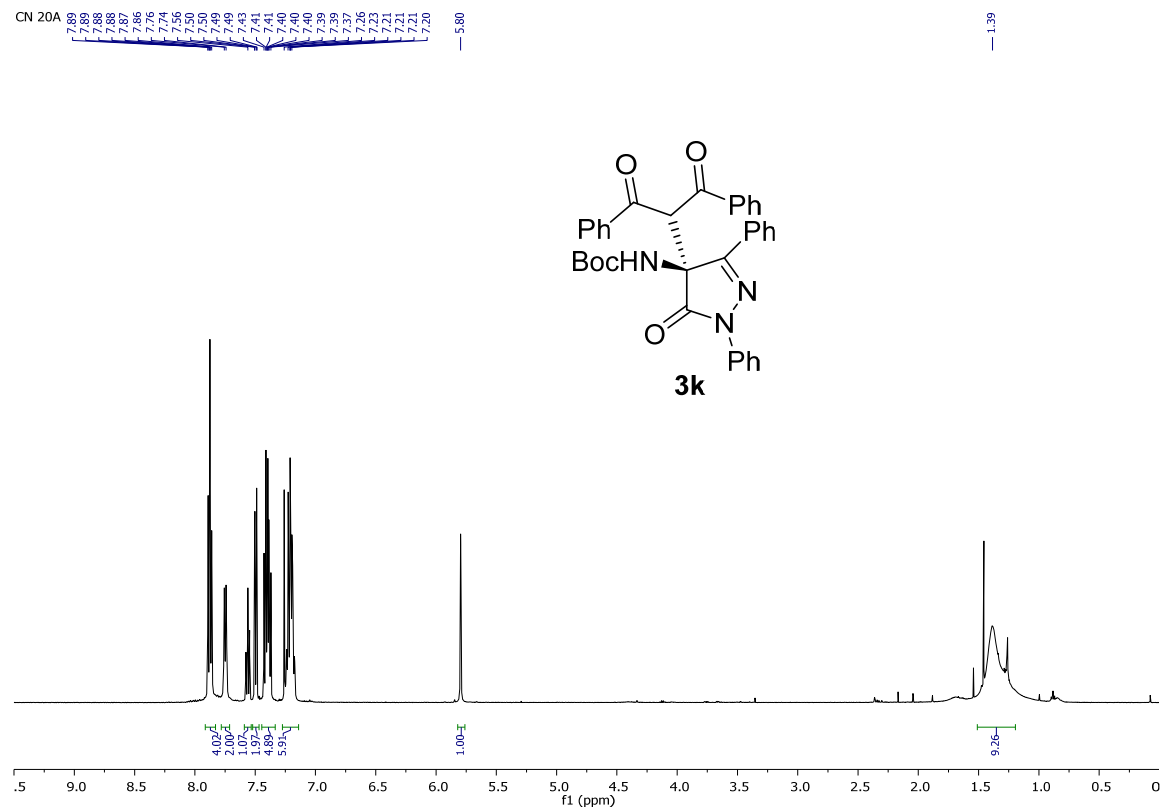

**Figure S25.** <sup>1</sup>H NMR spectrum of **3k** (CDCl<sub>3</sub>, 500 MHz).

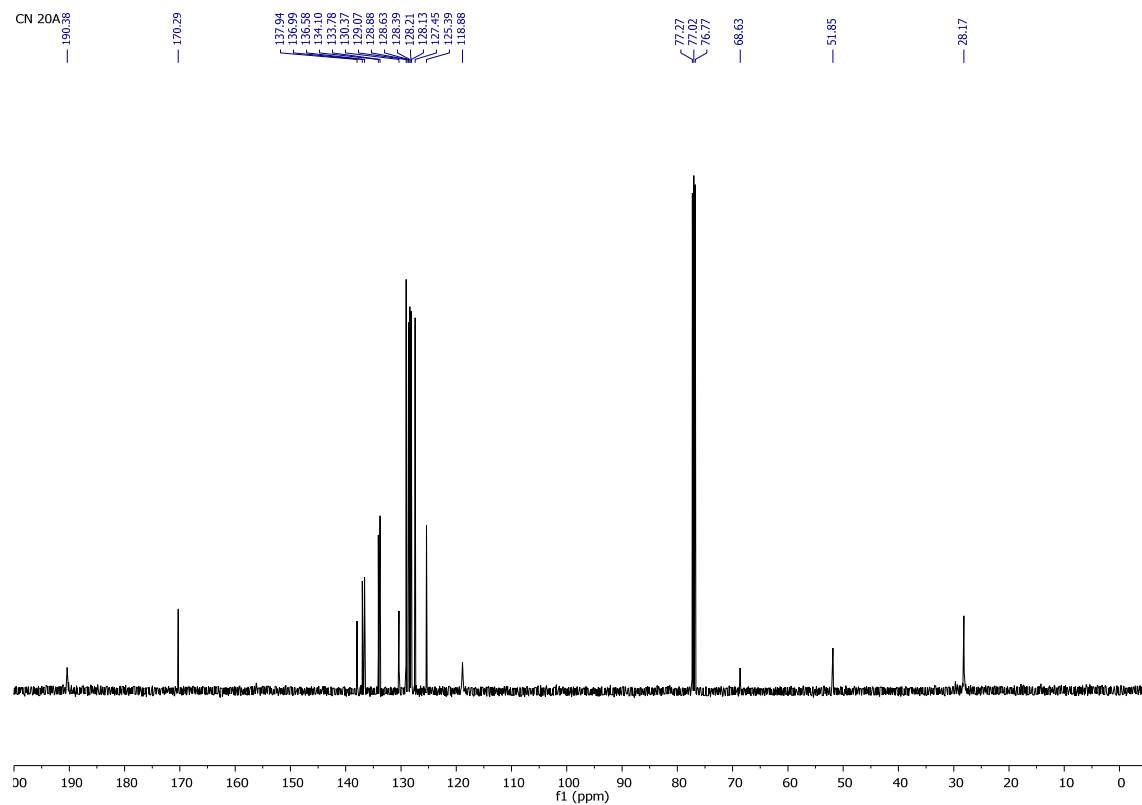

**Figure S26.** <sup>13</sup>C NMR spectrum of **3k** (CDCl<sub>3</sub>, 126 MHz).

***tert*-Butyl (S)-(4-(2,4-dioxopentan-3-yl)-1-methyl-5-oxo-3-phenyl-4,5-dihydro-1*H*-pyrazol-4-yl)carbamate (**3l**).**

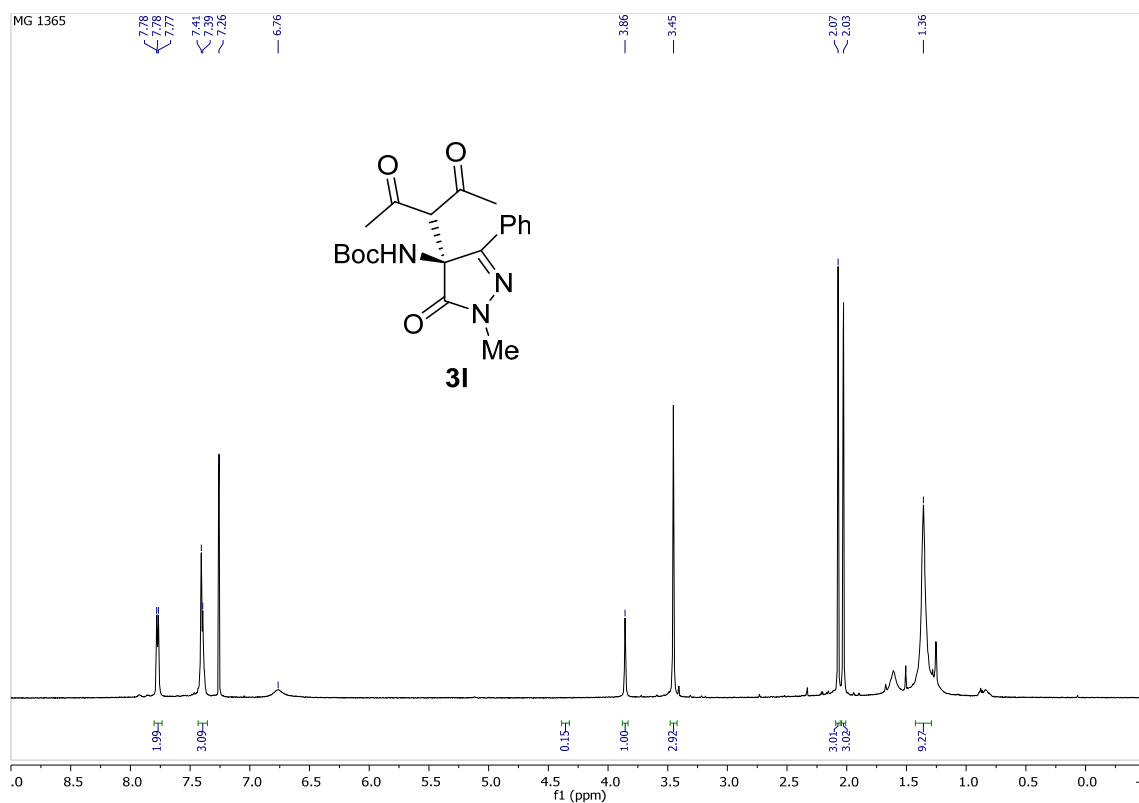

**Figure S27.** <sup>1</sup>H NMR spectrum of **3l** (CDCl<sub>3</sub>, 500 MHz).

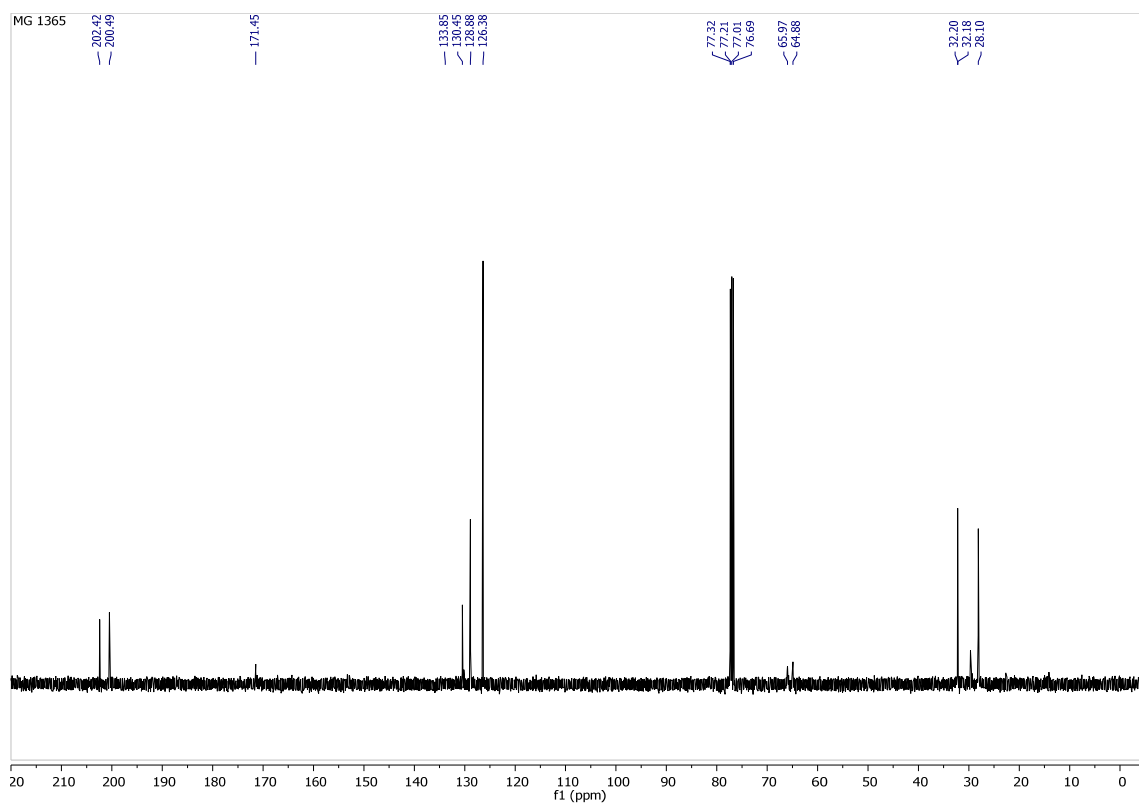

**Figure S28.** <sup>13</sup>C NMR spectrum of **3l** (CDCl<sub>3</sub>, 126 MHz).

***tert*-Butyl (S)-(3,3',5-trimethyl-5'-oxo-1'-phenyl-1',5'-dihydro-1*H*,4'*H*-[4,4'-bipyrazol]-4'-yl)carbamate (**4a**).**

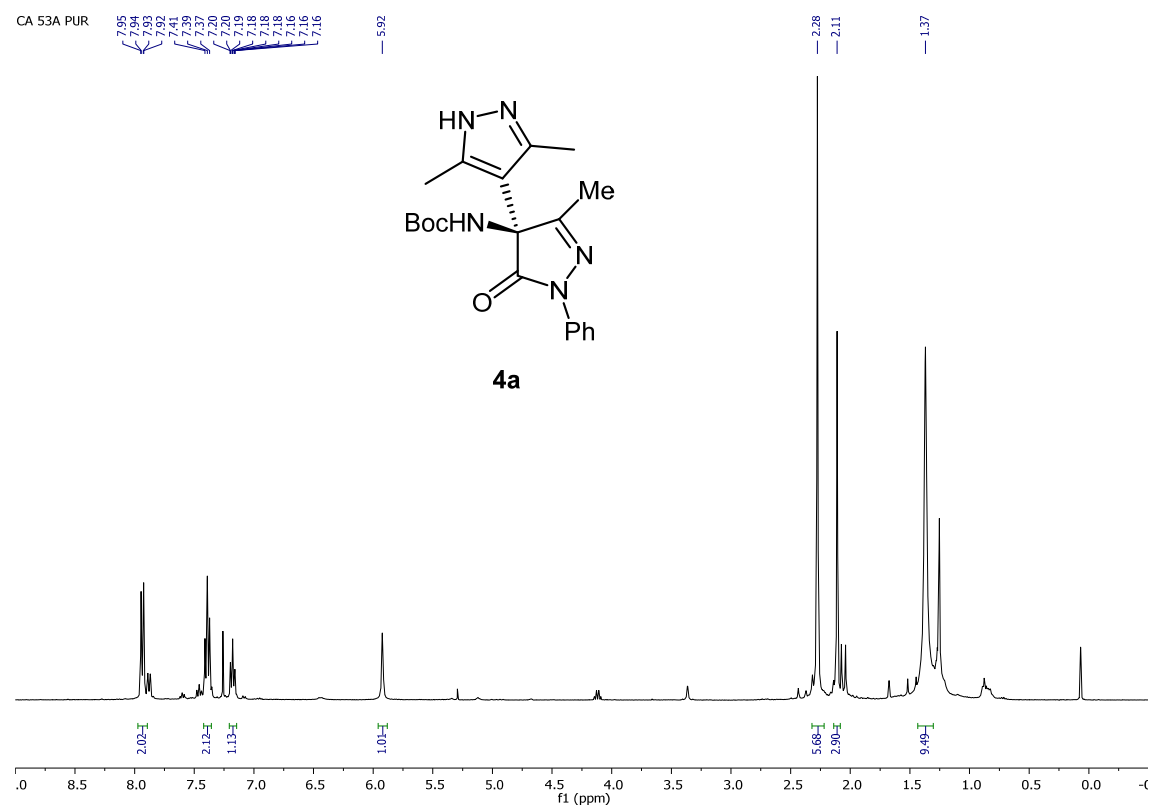

**Figure S29.**  $^1\text{H}$  NMR spectrum of **4a** ( $\text{CDCl}_3$ , 400 MHz).

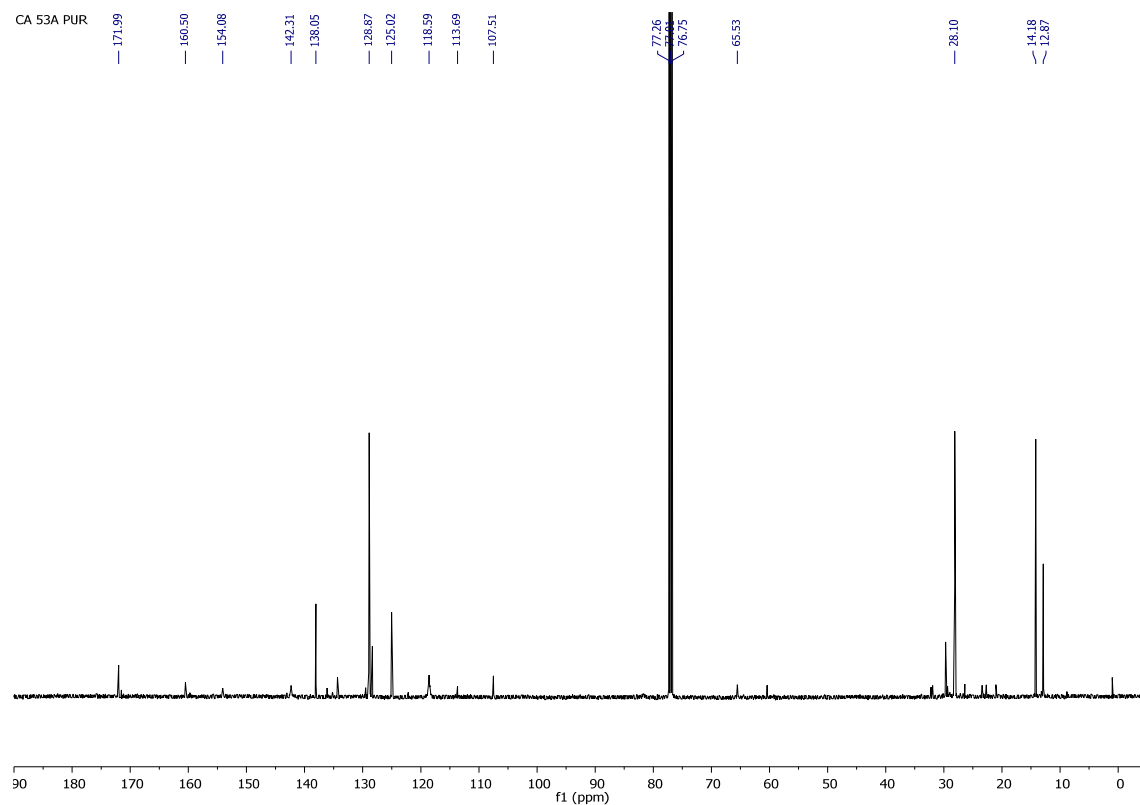

**Figure S30.**  $^{13}\text{C}$  NMR spectrum of **4a** ( $\text{CDCl}_3$ , 126 MHz).

***tert*-Butyl (S)- ( 3'-ethyl-3,5-dimethyl-5'-oxo-1'-phenyl-1',5'-dihydro-1*H*,4'*H*-[4,4'-bipyrazol]-4'-yl)carbamate (4b).**

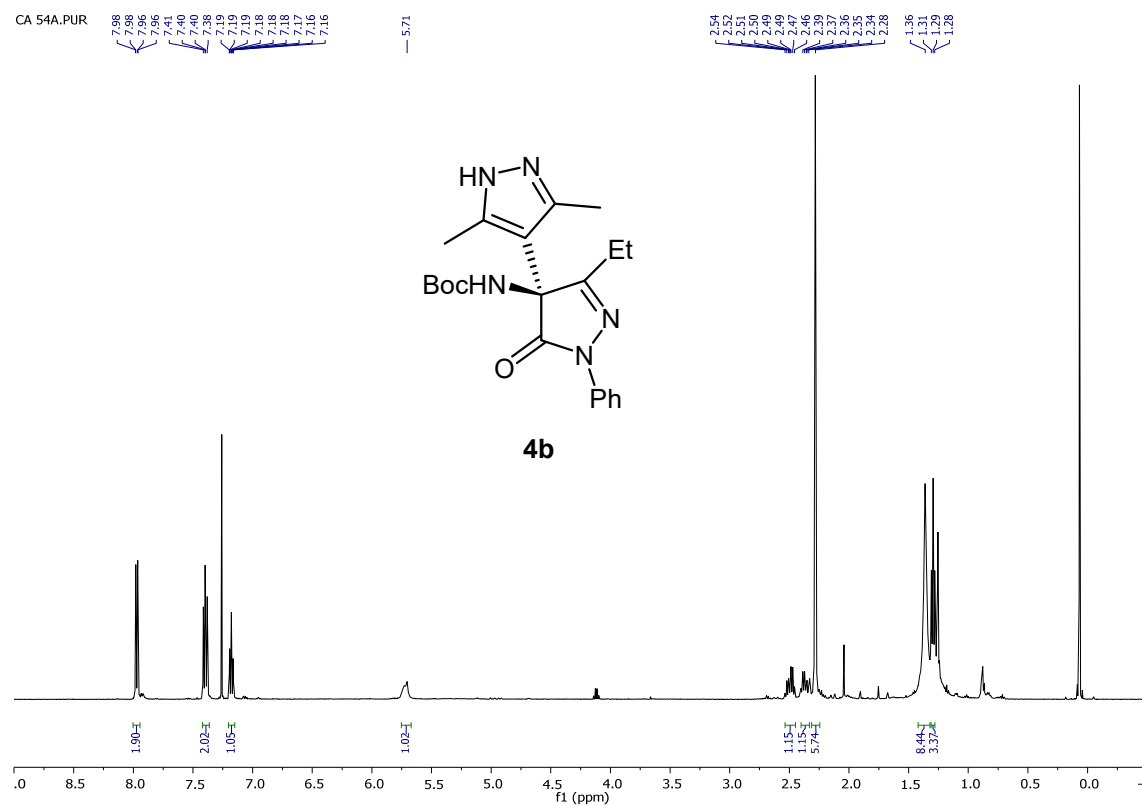

**Figure S31.**  $^1\text{H}$  NMR spectrum of **4b** ( $\text{CDCl}_3$ , 500 MHz).

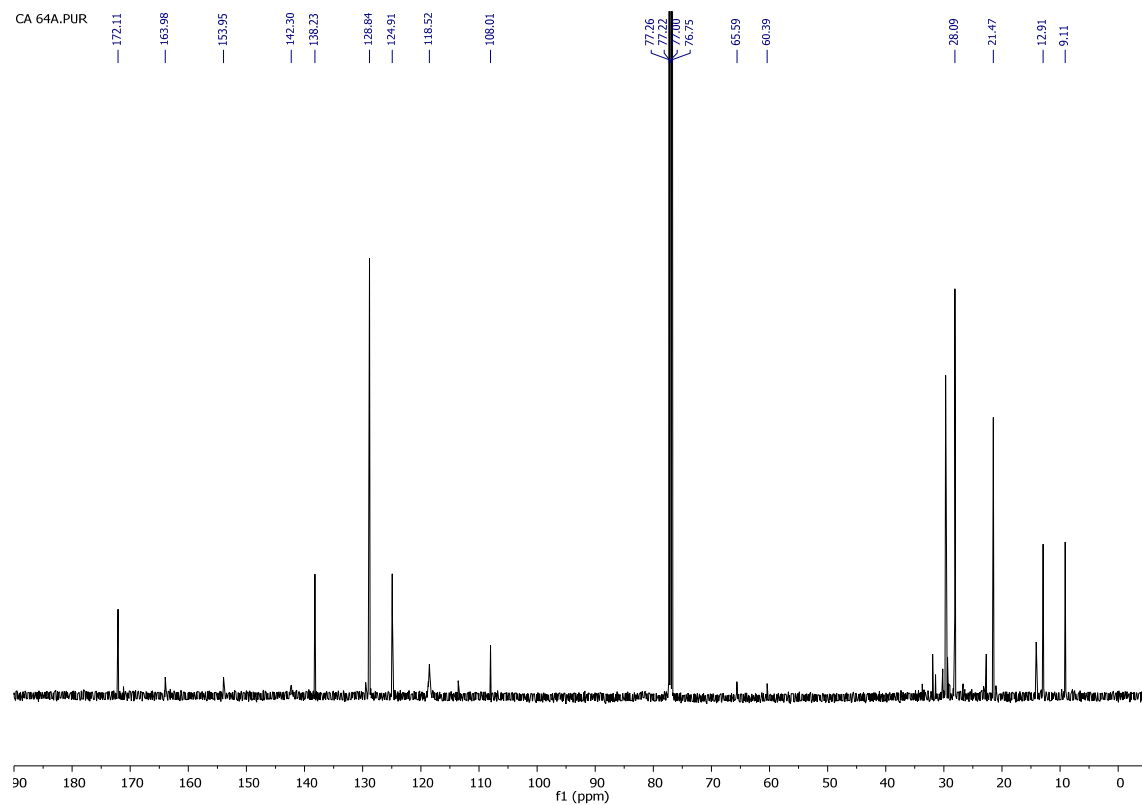

**Figure S32.**  $^{13}\text{C}$  NMR spectrum of **4b** ( $\text{CDCl}_3$ , 126 MHz).

***tert*-Butyl (S)- ( 3'-isopropyl-3,5-dimethyl-5'-oxo-1'-phenyl-1',5'-dihydro-1*H*,4'*H*-[4,4'-bipyrazol]-4'-yl)carbamate (**4c**).**

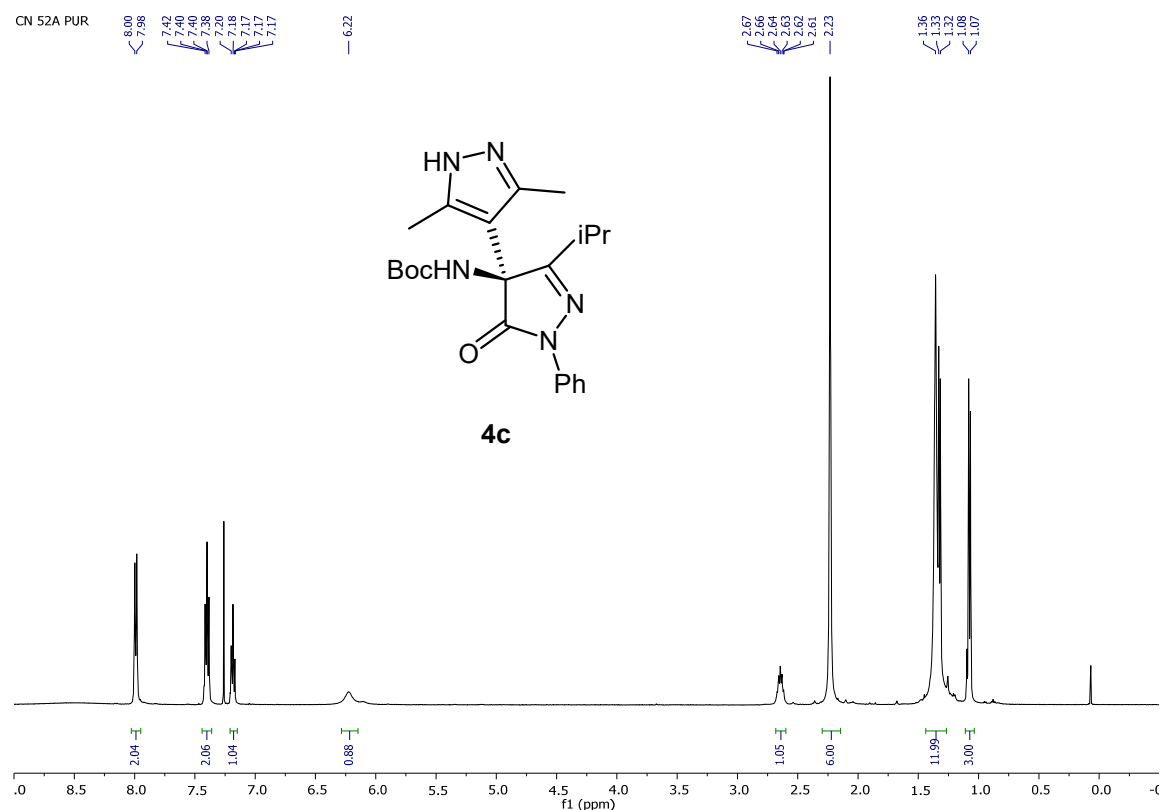

**Figure S33.**  $^1\text{H}$  NMR spectrum of **4c** ( $\text{CDCl}_3$ , 500 MHz).

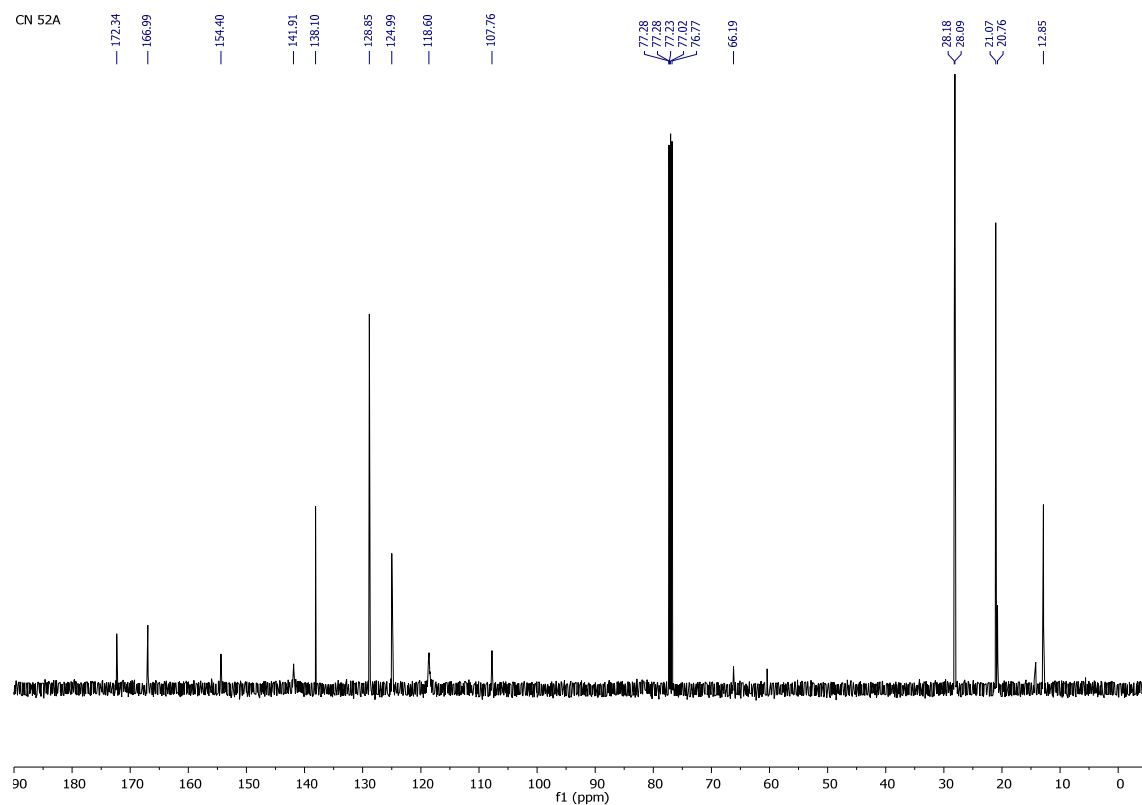

**Figure S34.**  $^{13}\text{C}$  NMR spectrum of **4c** ( $\text{CDCl}_3$ , 126 MHz).

***tert*-Butyl (S)-(3,5-dimethyl-5'-oxo-1',3'-diphenyl-1',5'-dihydro-1*H*,4'*H*-[4,4'-bipyrazol]-4'-yl)carbamate (4e).**

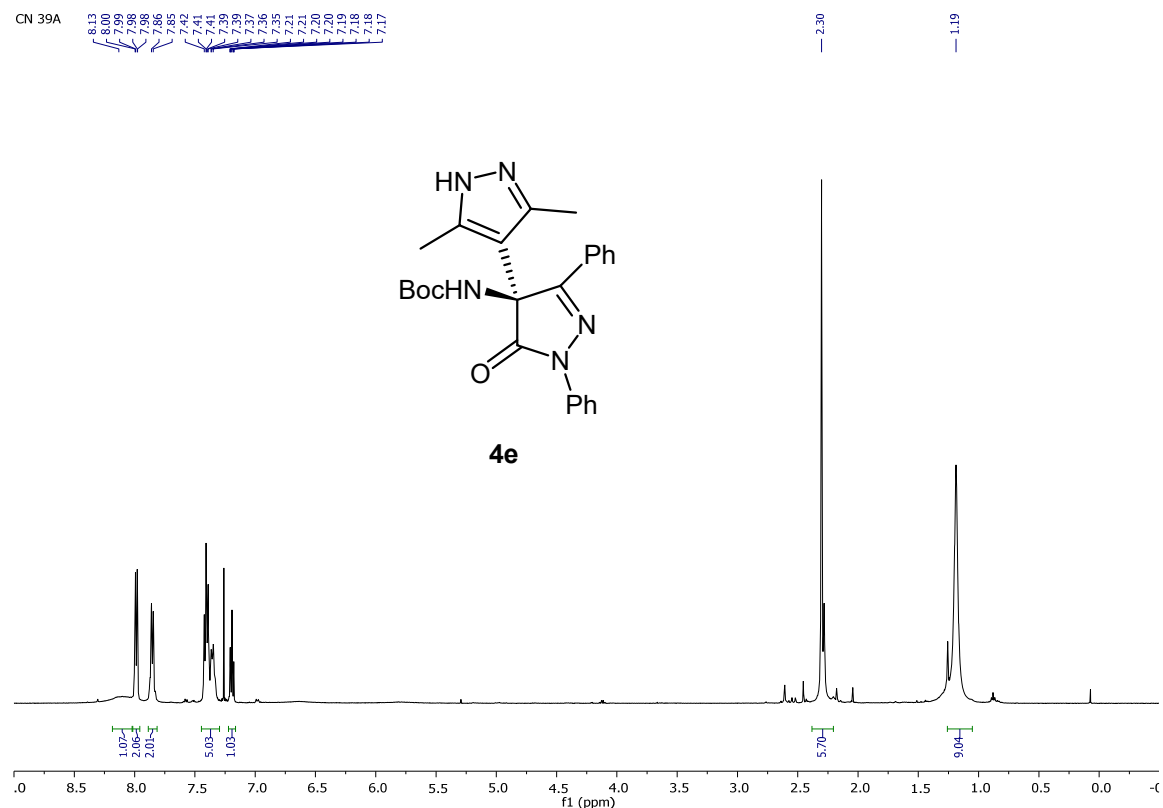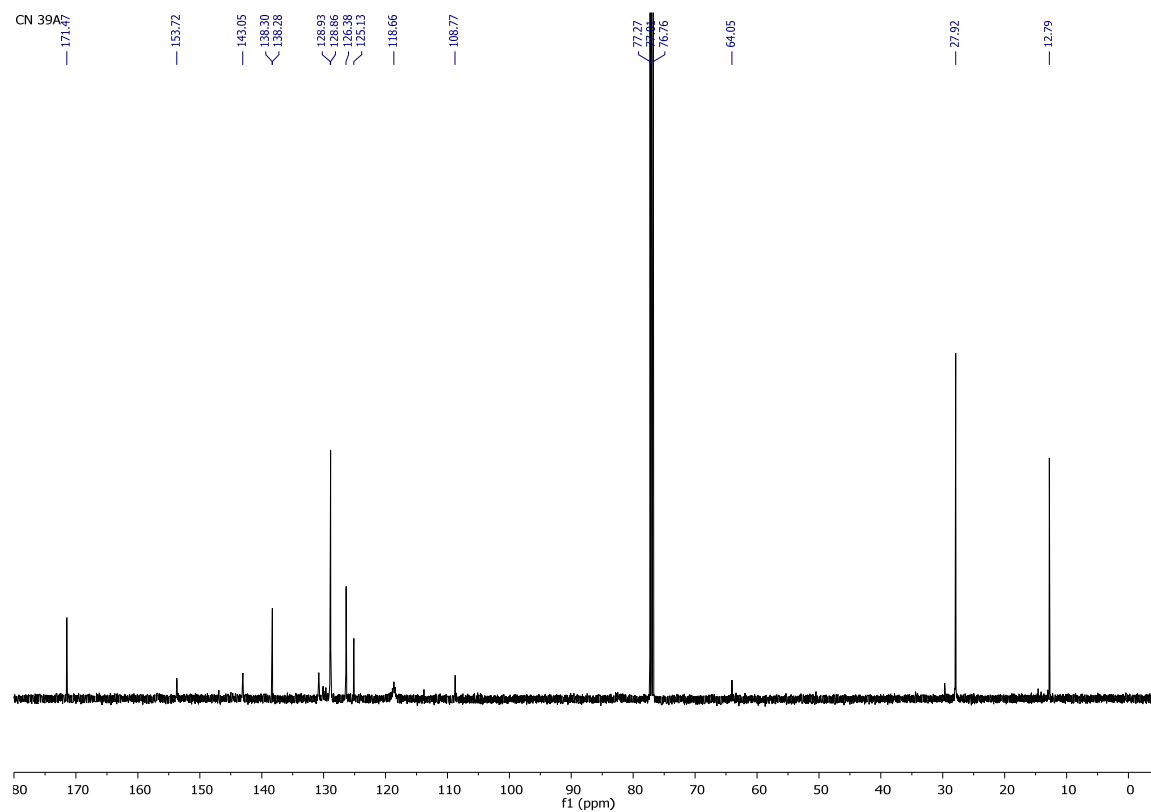

***tert*-Butyl (S)-(1'-(4-chlorophenyl)-3,3',5-trimethyl-5'-oxo-1',5'-dihydro-1*H*,4'*H*-[4,4'-bipyrazol]-4'-yl)carbamate (4f).**

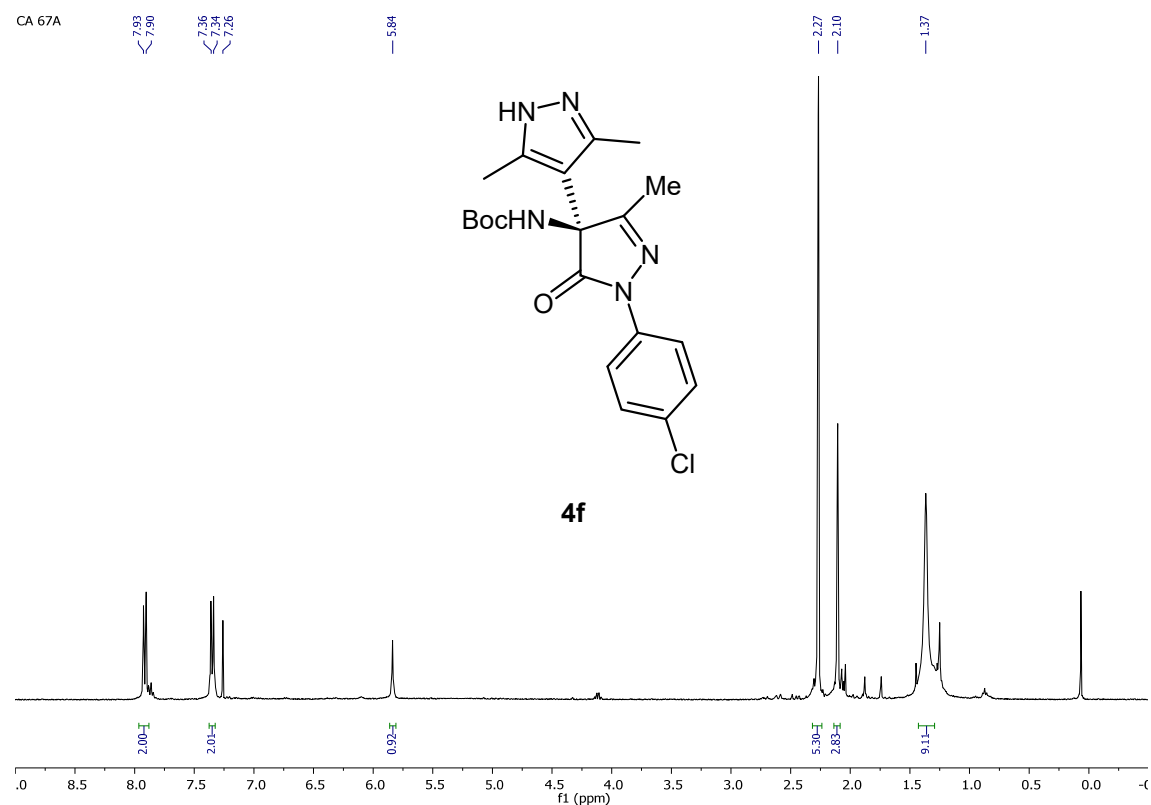

**Figure S37.**  $^1\text{H}$  NMR spectrum of **4f** ( $\text{CDCl}_3$ , 500 MHz).

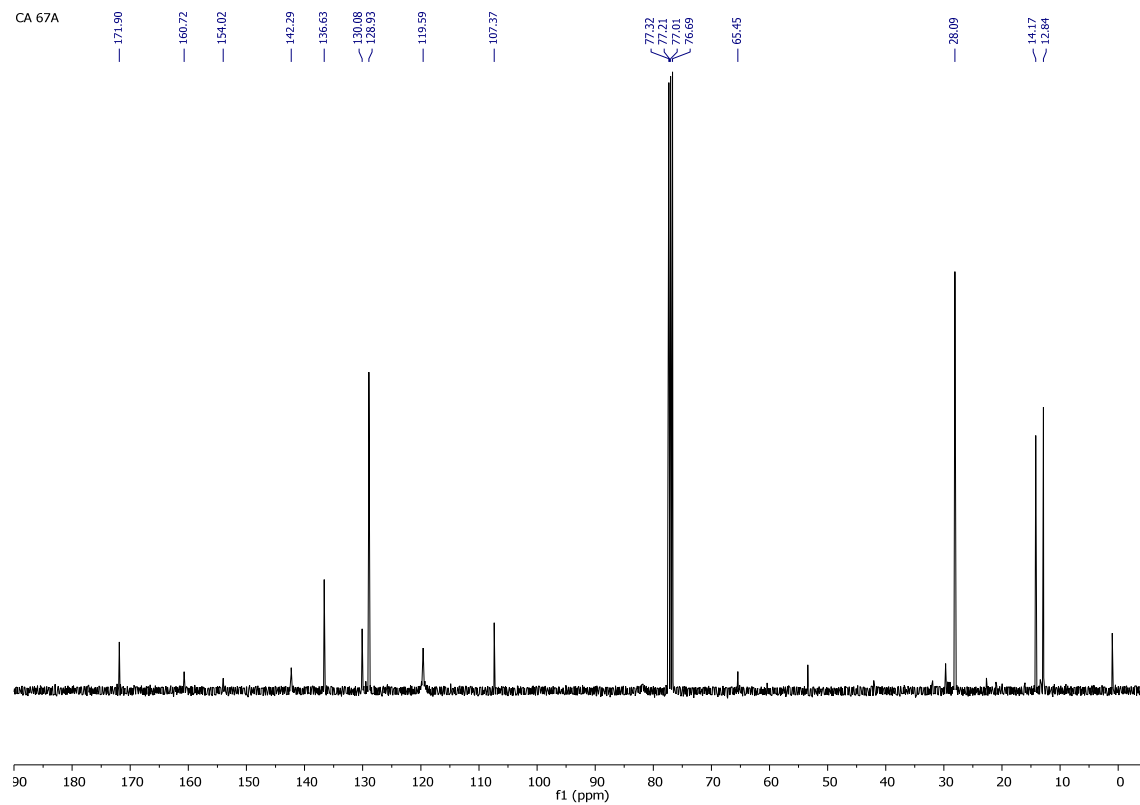

**Figure S38.**  $^{13}\text{C}$  NMR spectrum of **4f** ( $\text{CDCl}_3$ , 126 MHz).

***tert*-Butyl (S)-(3,3',5-trimethyl-5'-oxo-1'-(*p*-tolyl)-1',5'-dihydro-1*H*,4'*H*-[4,4'-bipyrazol]-4'-yl)carbamate (4g).**

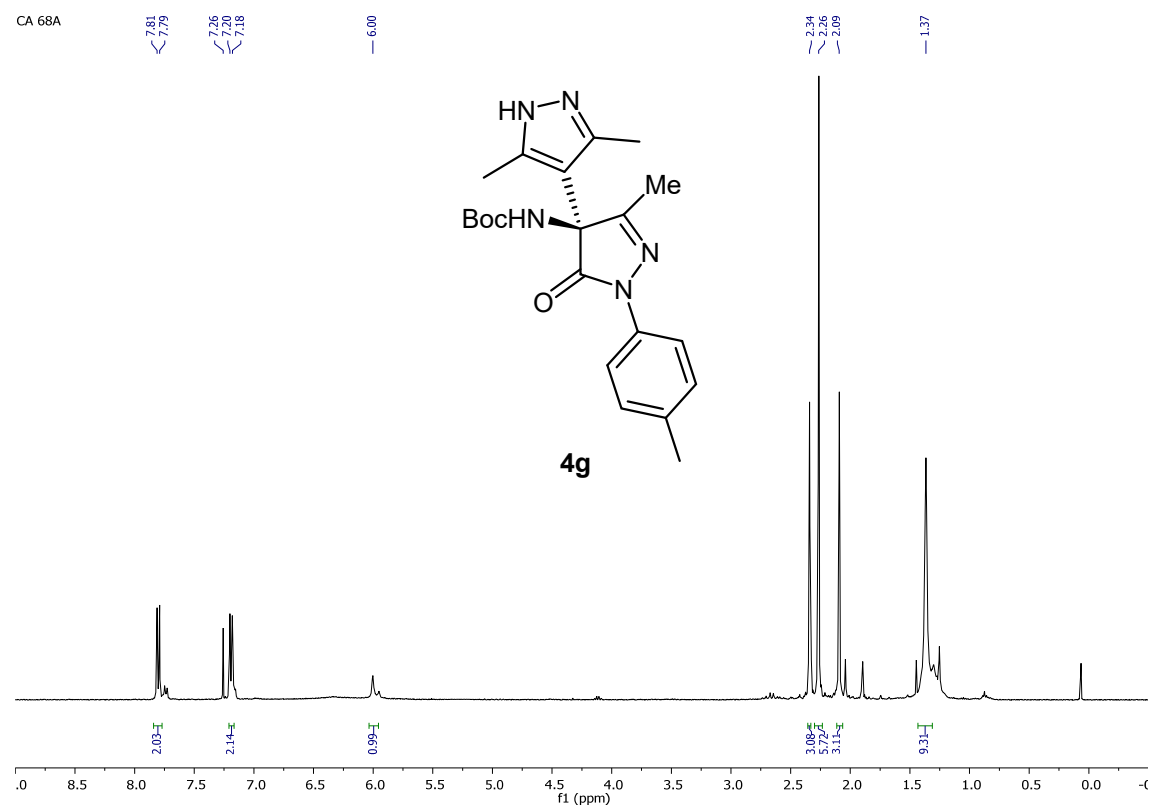

**Figure S39.**  $^1\text{H}$  NMR spectrum of **4g** ( $\text{CDCl}_3$ , 500 MHz).

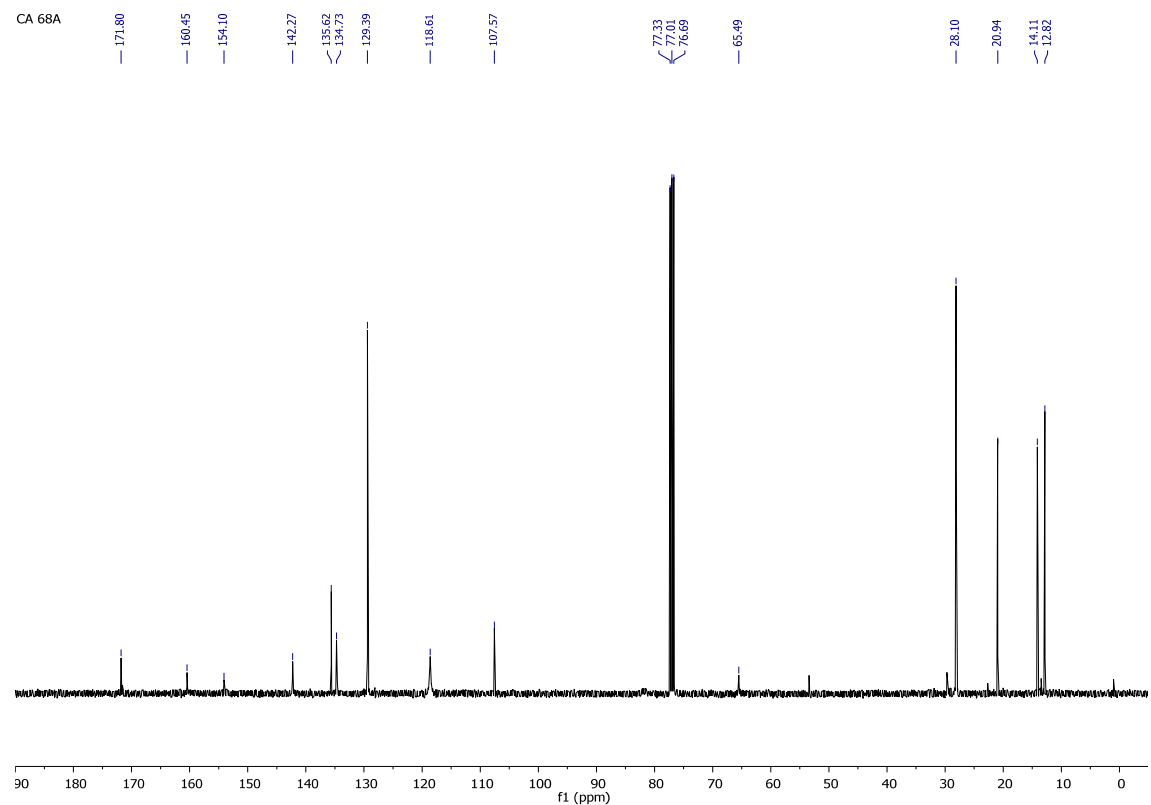

**Figure S40.**  $^{13}\text{C}$  NMR spectrum of **4g** ( $\text{CDCl}_3$ , 126 MHz).



***tert*-Butyl (S)-(3,5-diethyl-5'-oxo-1',3'-diphenyl-1',5'-dihydro-1*H*,4'*H*-[4,4'-bipyrazol]-4'-yl)carbamate (**4j**).**

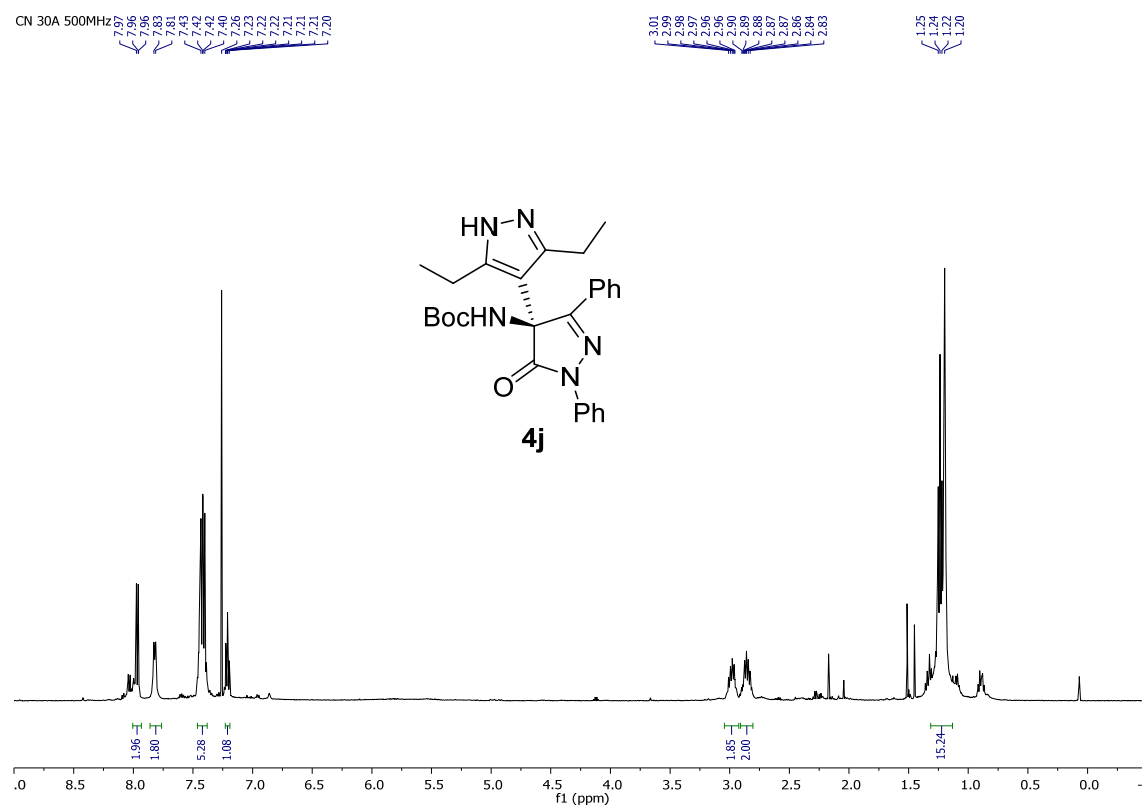

**Figure S41.** <sup>1</sup>H NMR spectrum of **4j** (CDCl<sub>3</sub>, 500 MHz).

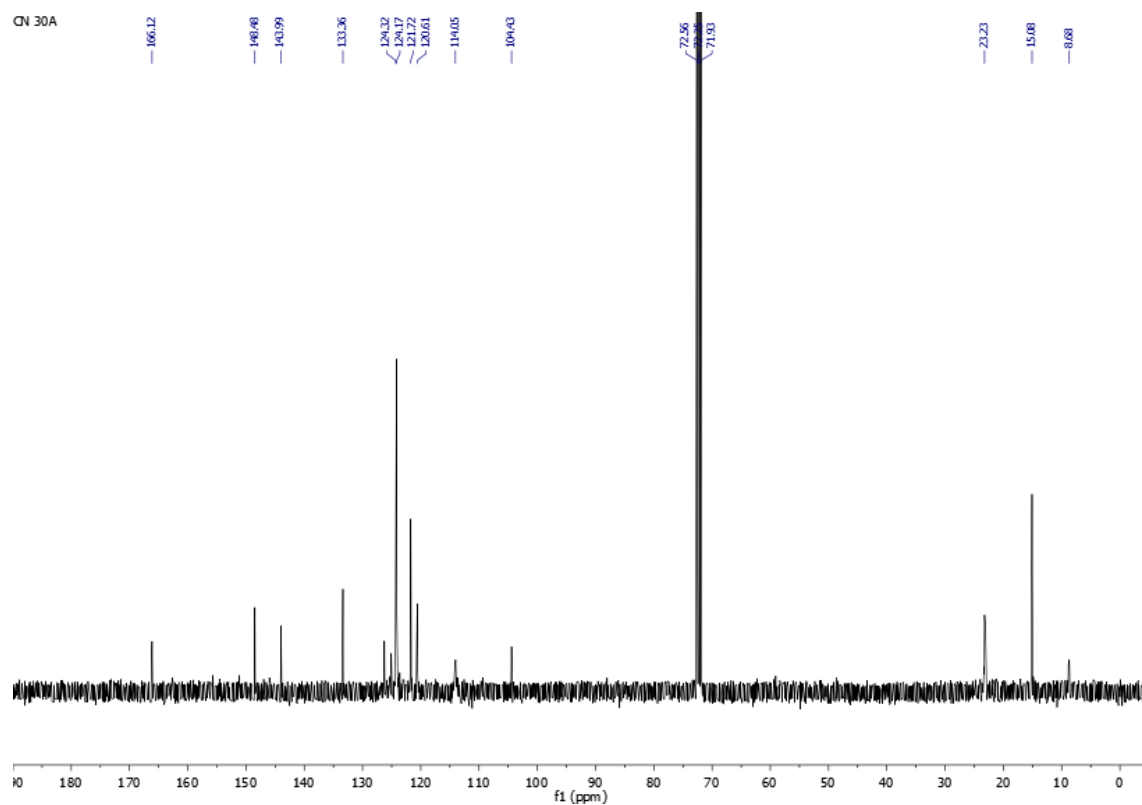

**Figure S42.** <sup>13</sup>C NMR spectrum of **4j** (CDCl<sub>3</sub>, 126 MHz).

***tert*-Butyl (S)-(3-methyl-5-oxo-4-(2-oxo-2-phenylethyl)-1-phenyl-4,5-dihydro-1*H*-pyrazol-4-yl)carbamate (**5i**).**

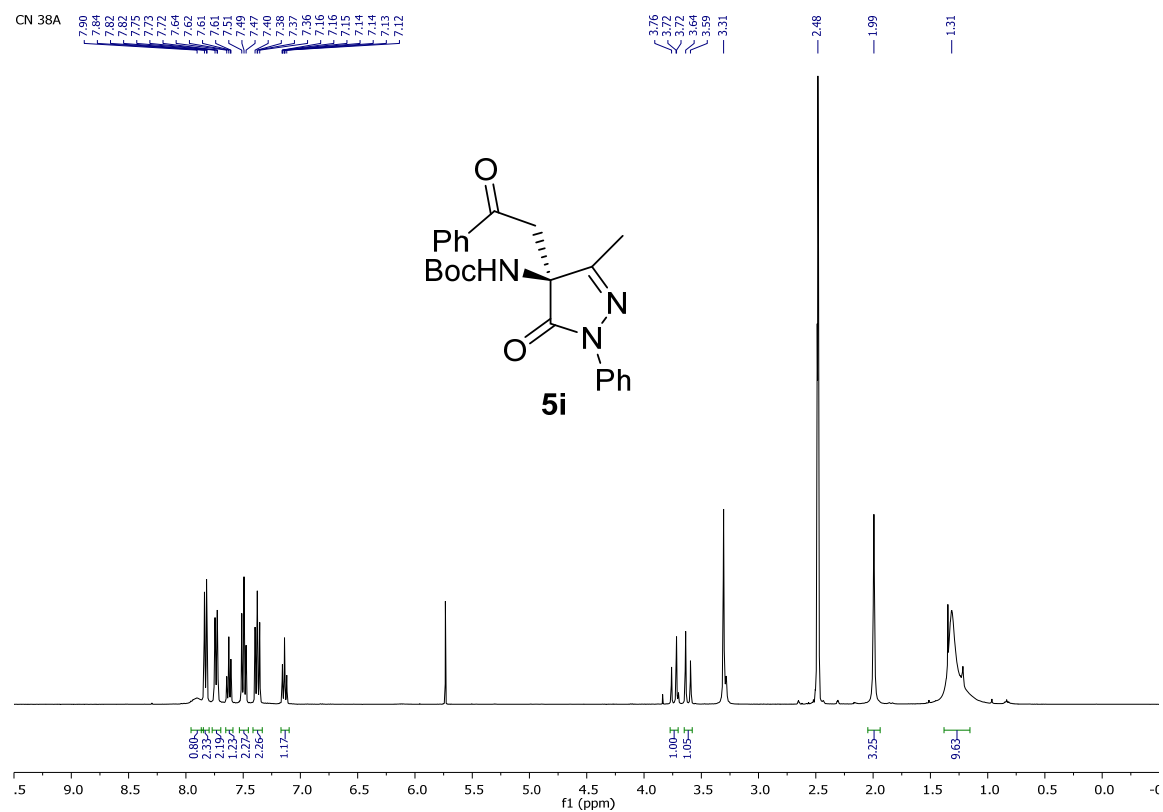

**Figure S43.** <sup>1</sup>H NMR spectrum of **5i** (DMSO-d<sub>6</sub>, 400 MHz).

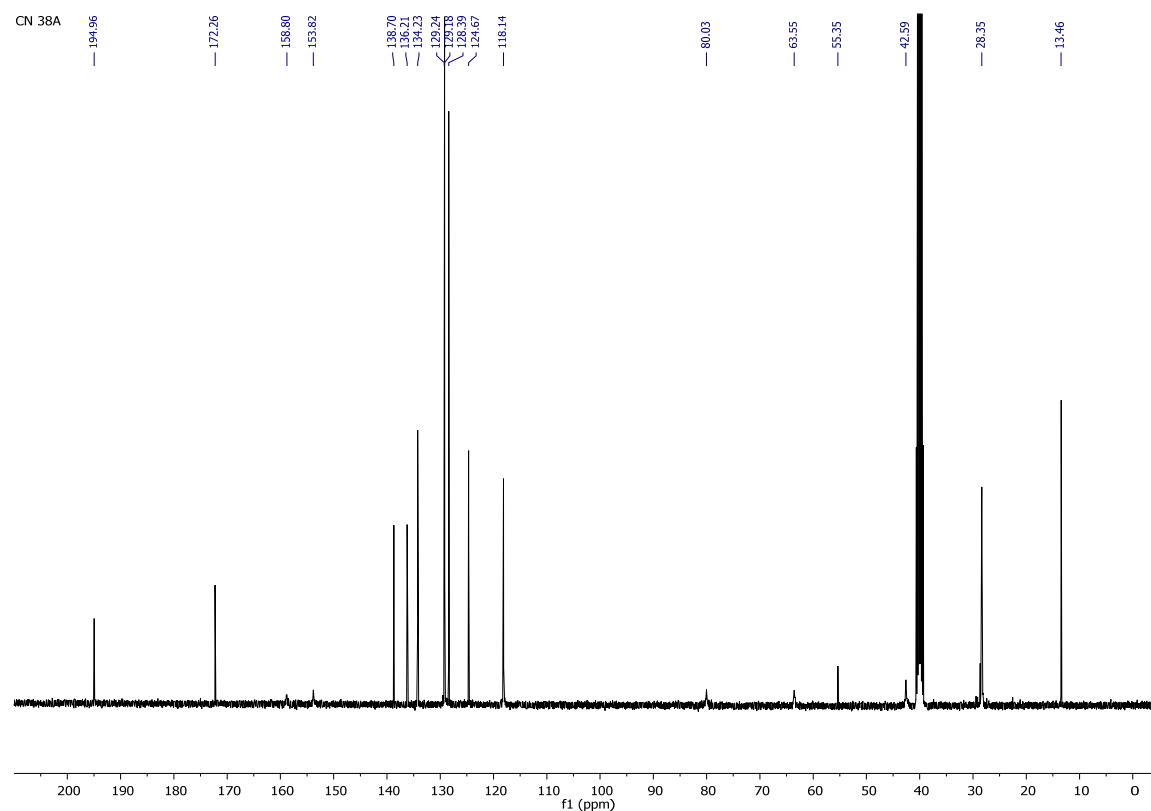

**Figure S44.** <sup>13</sup>C NMR spectrum of **5i** (DMSO-d<sub>6</sub>, 100 MHz).

***tert*-Butyl (S)-(1-(4-chlorophenyl)-3,3',5-trimethyl-5'-oxo-1'-phenyl-1',5'-dihydro-1*H*,4'*H*-[4,4'-bipyrazol]-4'-yl)carbamate (6a).**

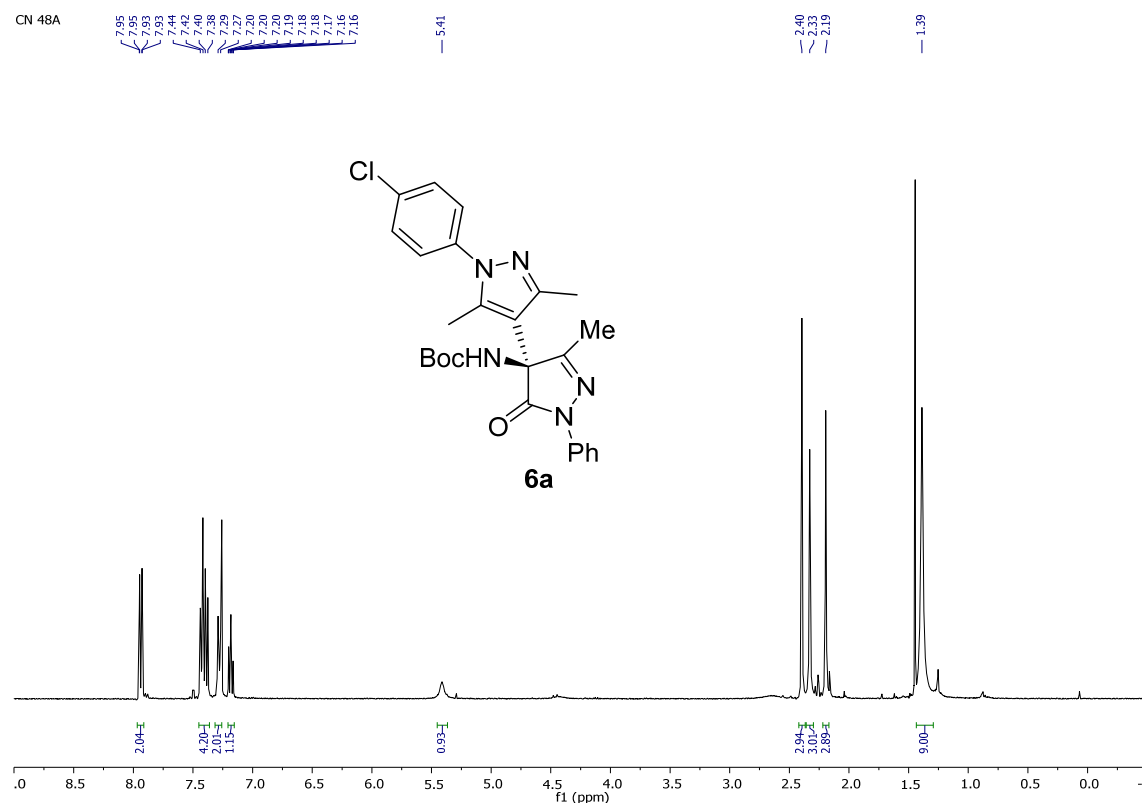

**Figure S45.** <sup>1</sup>H NMR spectrum of **6a** (CDCl<sub>3</sub>, 500 MHz).

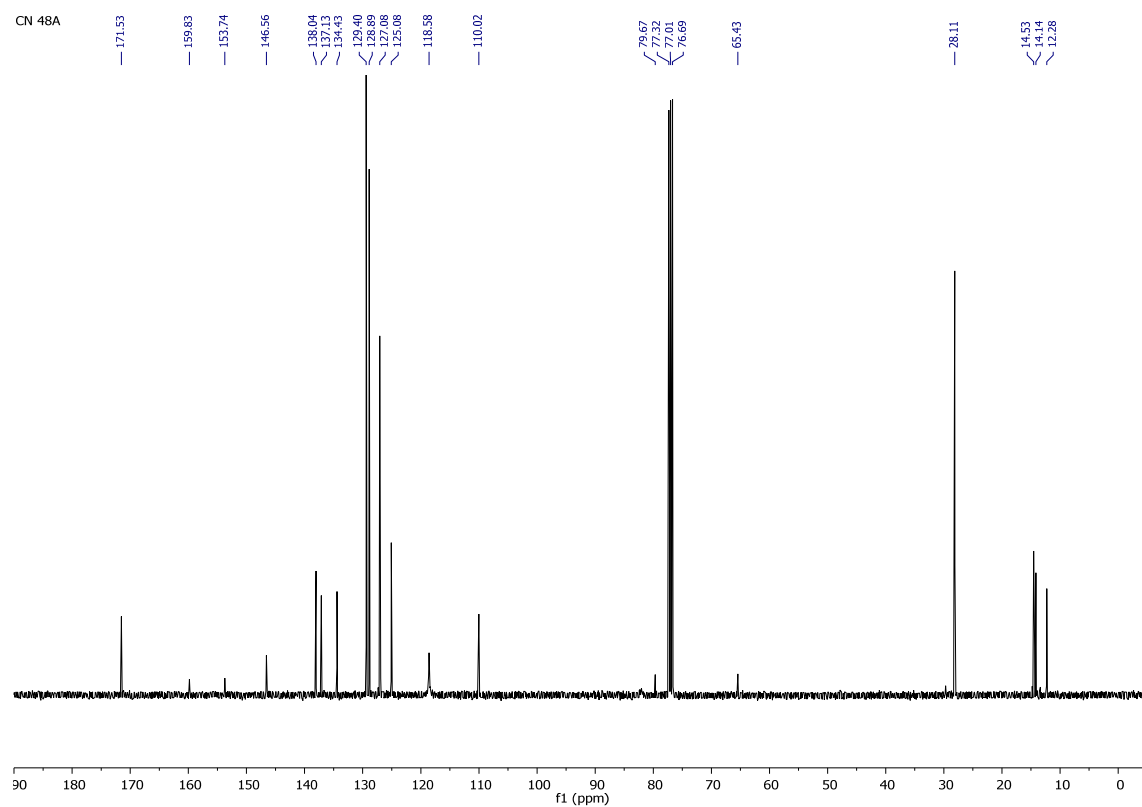

**Figure S46.** <sup>13</sup>C NMR spectrum of **6a** (CDCl<sub>3</sub>, 126 MHz).

***tert*-Butyl (S)-(1-(4-chlorophenyl)-3,5-dimethyl-5'-oxo-1',3'-diphenyl-1',5'-dihydro-1*H*,4'*H*-[4,4'-bipyrazol]-4'-yl)carbamate (6e).**

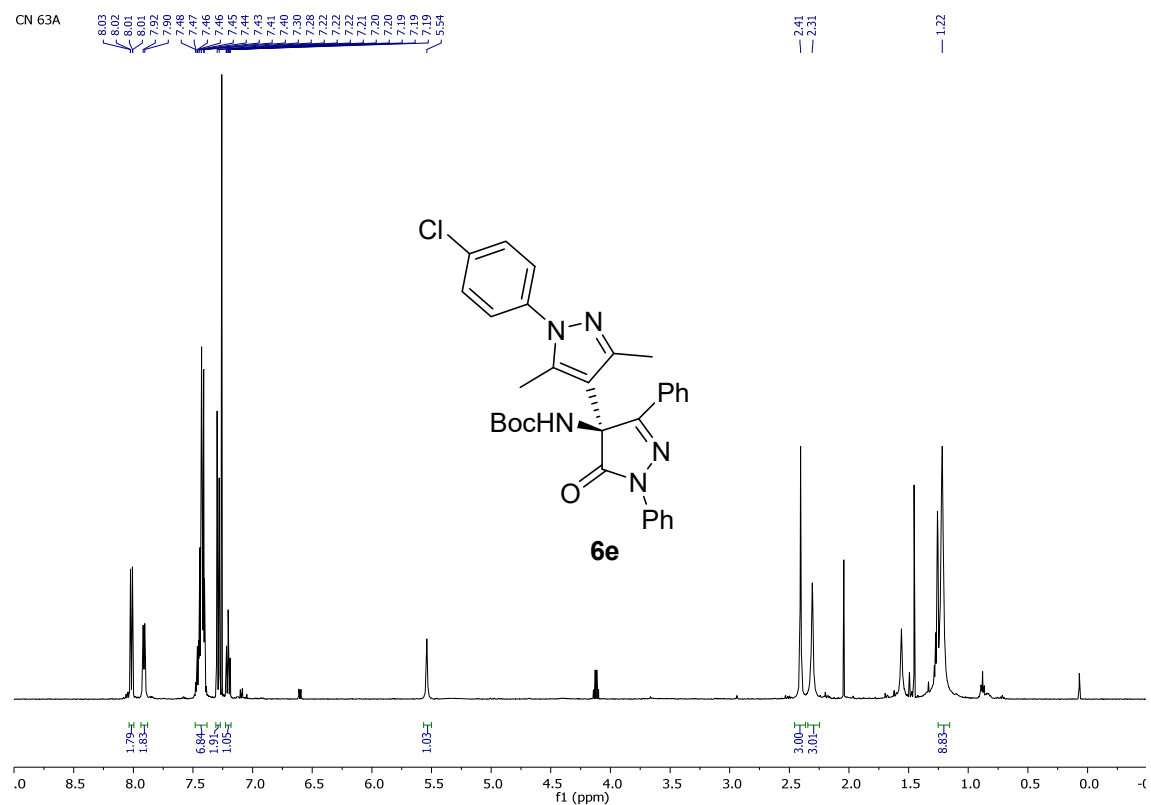

**Figure S47.**  $^1\text{H}$  NMR spectrum of **6e** ( $\text{CDCl}_3$ , 500 MHz).

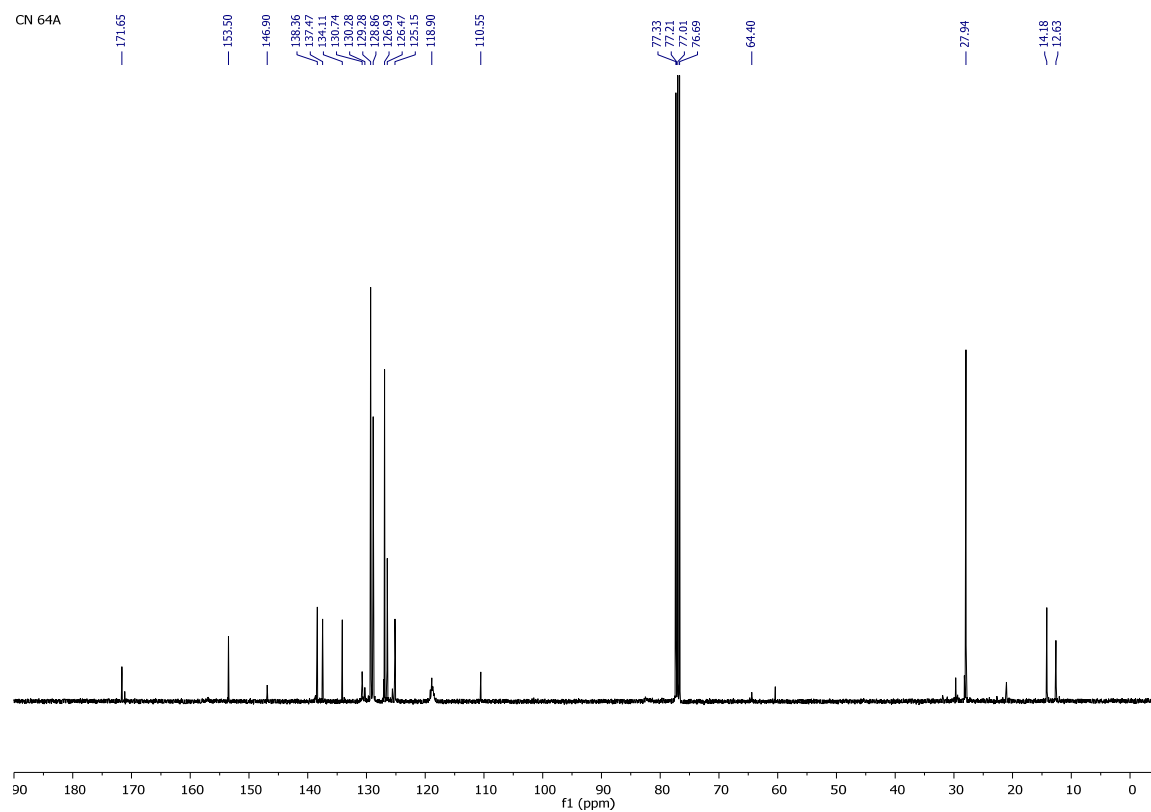

**Figure S48.**  $^{13}\text{C}$  NMR spectrum of **6e** ( $\text{CDCl}_3$ , 126 MHz).

***tert*-Butyl (S)-(4-(3,5-dimethylisoxazol-4-yl)-3-methyl-5-oxo-1-phenyl-4,5-dihydro-1H-pyrazol-4-yl)carbamate (7a).**

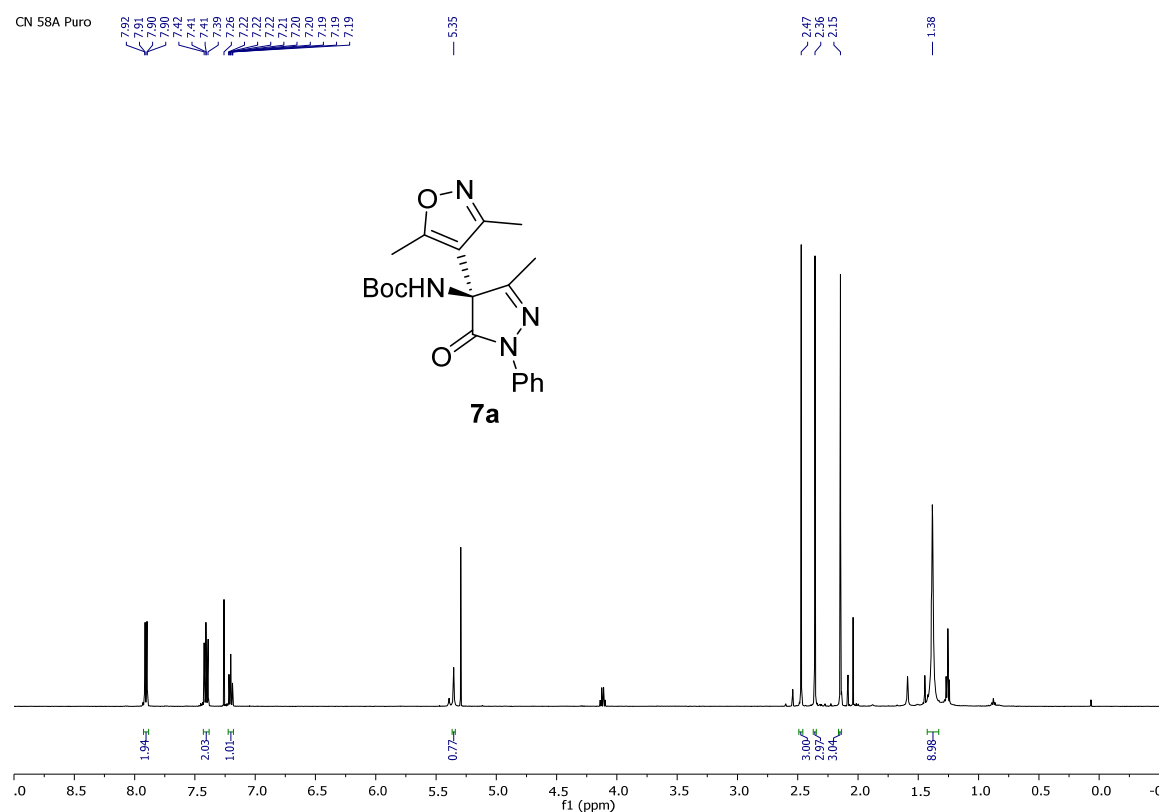

**Figure S49.** <sup>1</sup>H NMR spectrum of **7a** (CDCl<sub>3</sub>, 500 MHz).

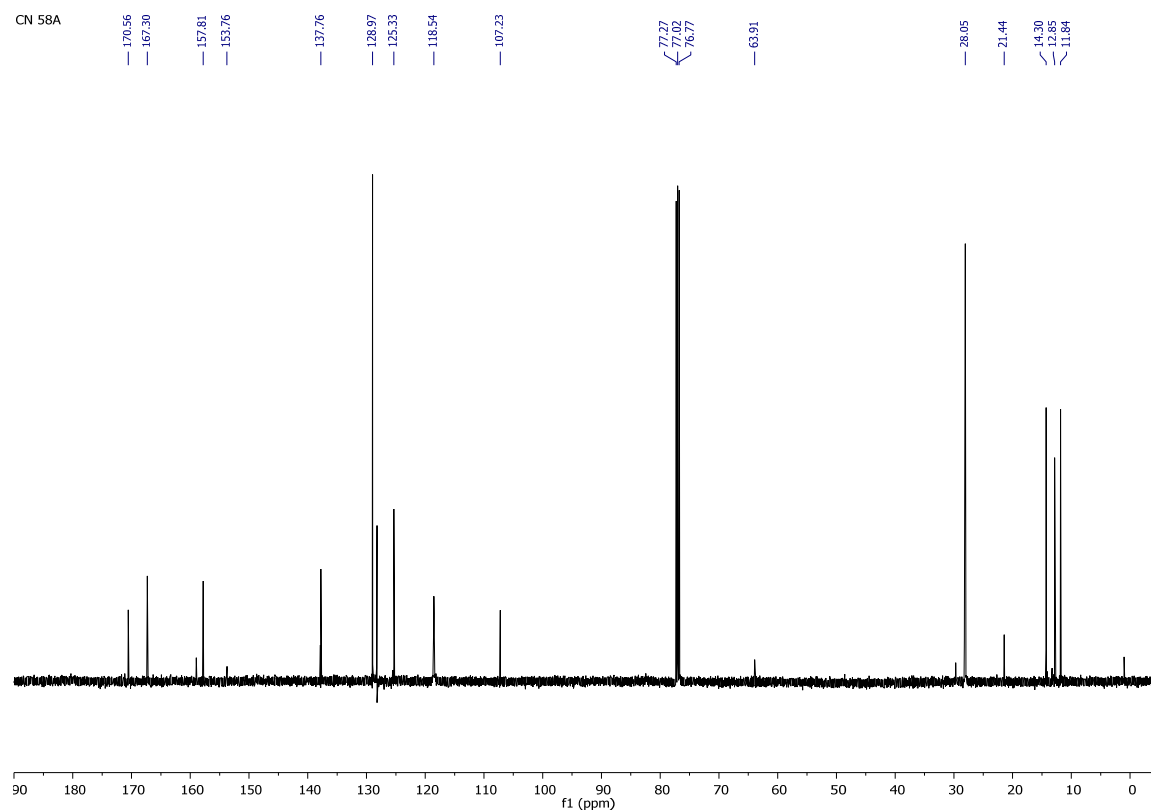

**Figure S50.** <sup>13</sup>C NMR spectrum of **7a** (CDCl<sub>3</sub>, 126 MHz).

***tert*-Butyl (S)-(4-(3,5-dimethylisoxazol-4-yl)-5-oxo-1,3-diphenyl-4,5-dihydro-1*H*-pyrazol-4-yl)carbamate (**7e**).**

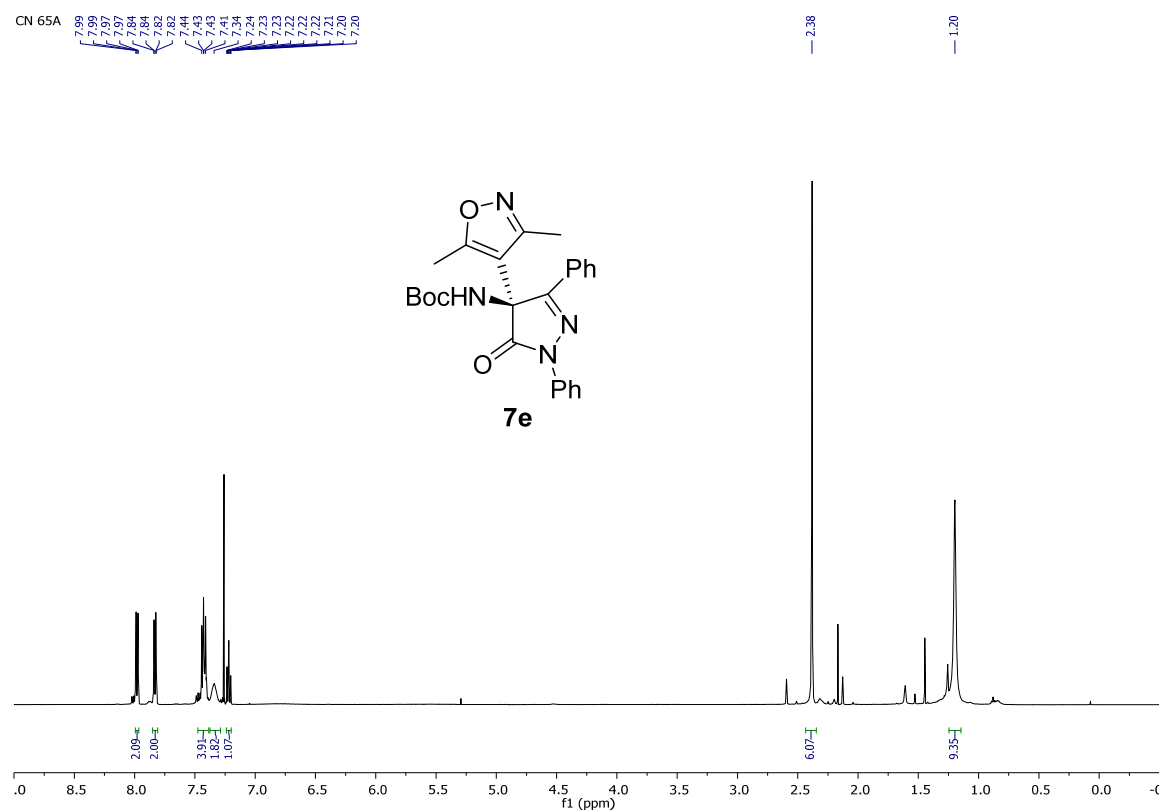

**Figure S51.**  $^1\text{H}$  NMR spectrum of **7e** ( $\text{CDCl}_3$ , 500 MHz).

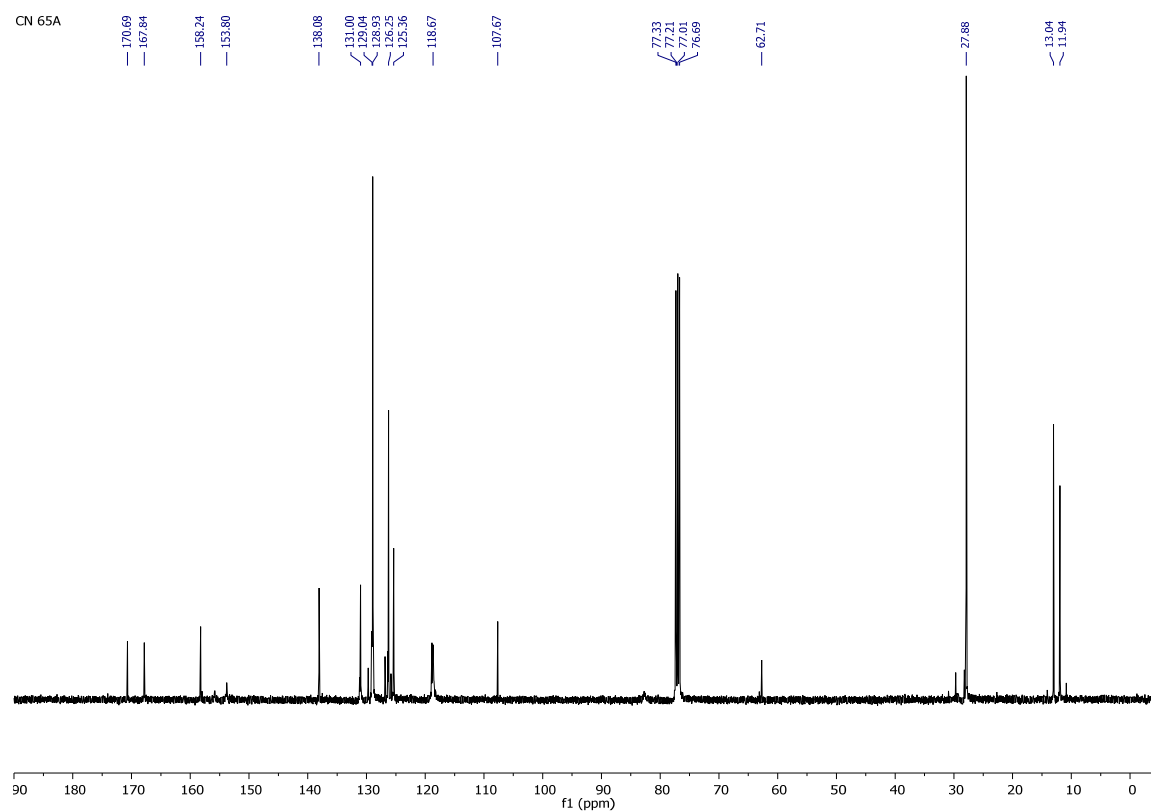

**Figure S52.**  $^{13}\text{C}$  NMR spectrum of **7e** ( $\text{CDCl}_3$ , 100 MHz).

### 3. HPLC Profiles of the isolated compounds.

*tert*-Butyl (S)-(4-(2,4-dioxopentan-3-yl)-3-methyl-5-oxo-1-phenyl-4,5-dihydro-1*H*-pyrazol-4-yl)carbamate (**3a**).

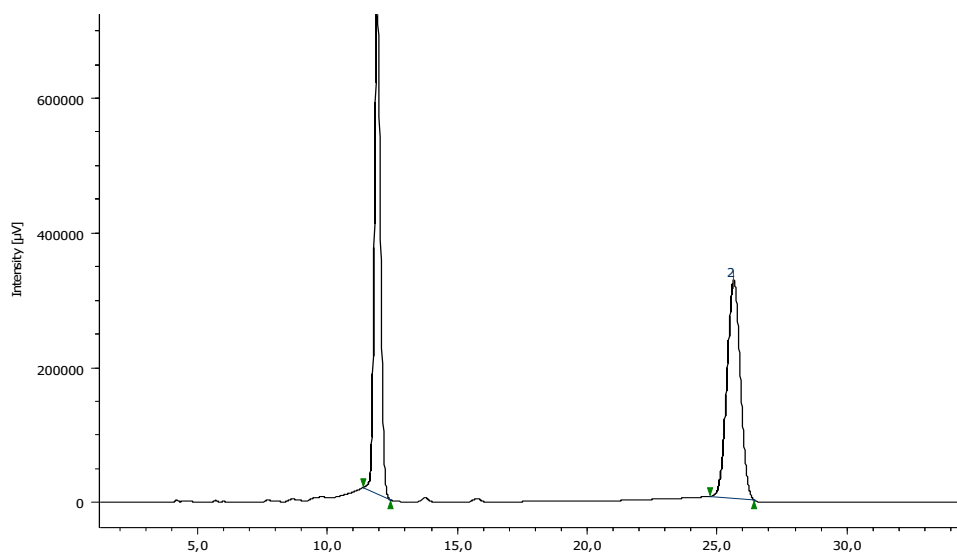

| Peak Number | t <sub>R</sub> (min) | Area     | Height | Area (%) | Symmetry Factor |
|-------------|----------------------|----------|--------|----------|-----------------|
| 1           | 11.900               | 11954241 | 722346 | 50.613   | 1.104           |
| 2           | 25.608               | 11664640 | 323407 | 49.387   | 1.005           |

**Figure S53.** HPLC profile for **3a** (racemic).

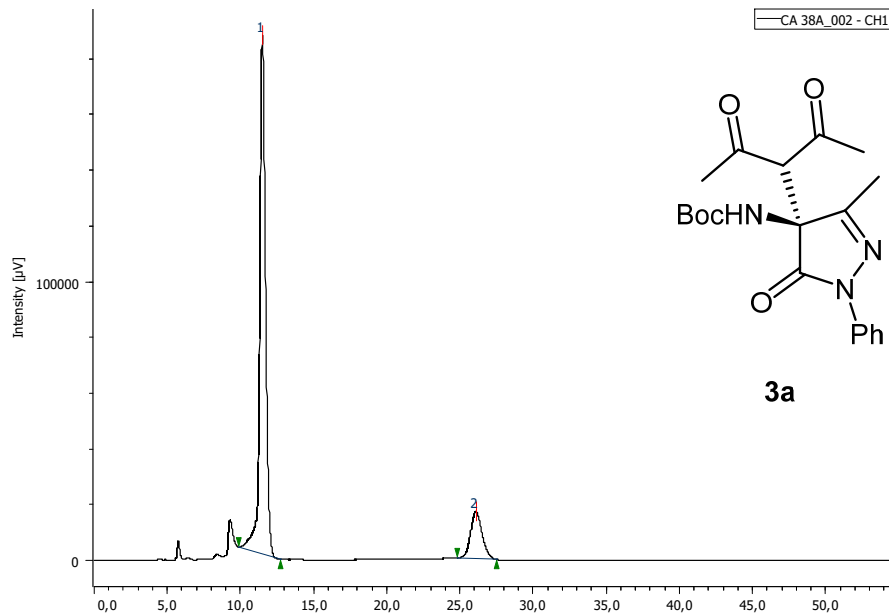

| Peak Number | t <sub>R</sub> (min) | Area    | Height | Area (%) | Symmetry Factor |
|-------------|----------------------|---------|--------|----------|-----------------|
| 1           | 11.492               | 5090147 | 185674 | 84.771   | 1.000           |
| 2           | 26.058               | 914451  | 16821  | 15.229   | 1.136           |

**Figure S54.** HPLC Profile for **3a** compound. Scheme 2, er 85:15.

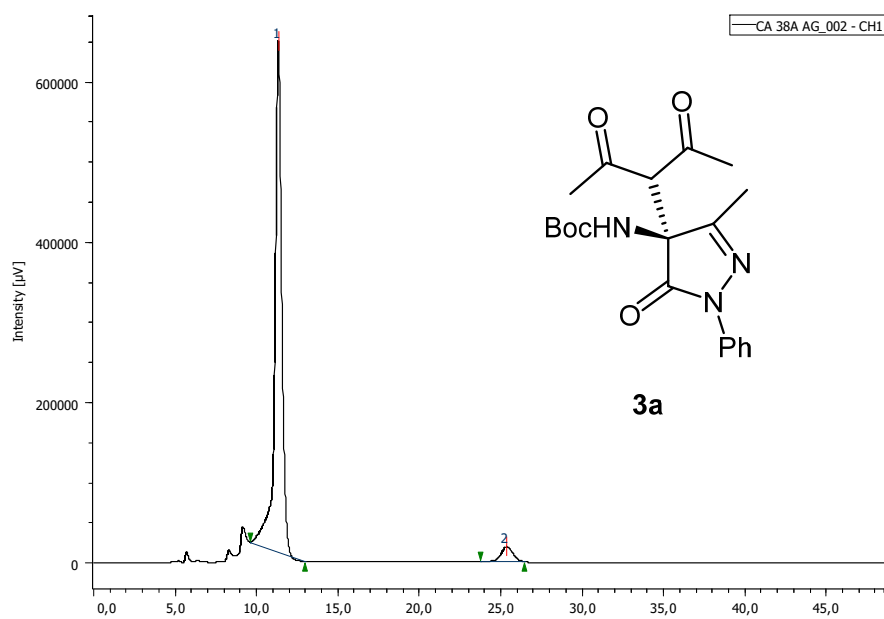

| Peak Number | t <sub>R</sub> (min) | Area     | Height | Area (%)      | Symmetry Factor |
|-------------|----------------------|----------|--------|---------------|-----------------|
| 1           | <b>11.325</b>        | 18650197 | 636380 | <b>95.160</b> | 0.817           |
| 2           | <b>25.342</b>        | 948603   | 18462  | <b>4.840</b>  | 1.000           |

**Figure S55.** HPLC Profile for **3a** from liquor mothers, er 95:5.



***tert*-Butyl (S)-(4-(2,4-dioxopentan-3-yl)-3-ethyl-5-oxo-1-phenyl-4,5-dihydro-1*H*-pyrazol-4-yl)carbamate (3b).**

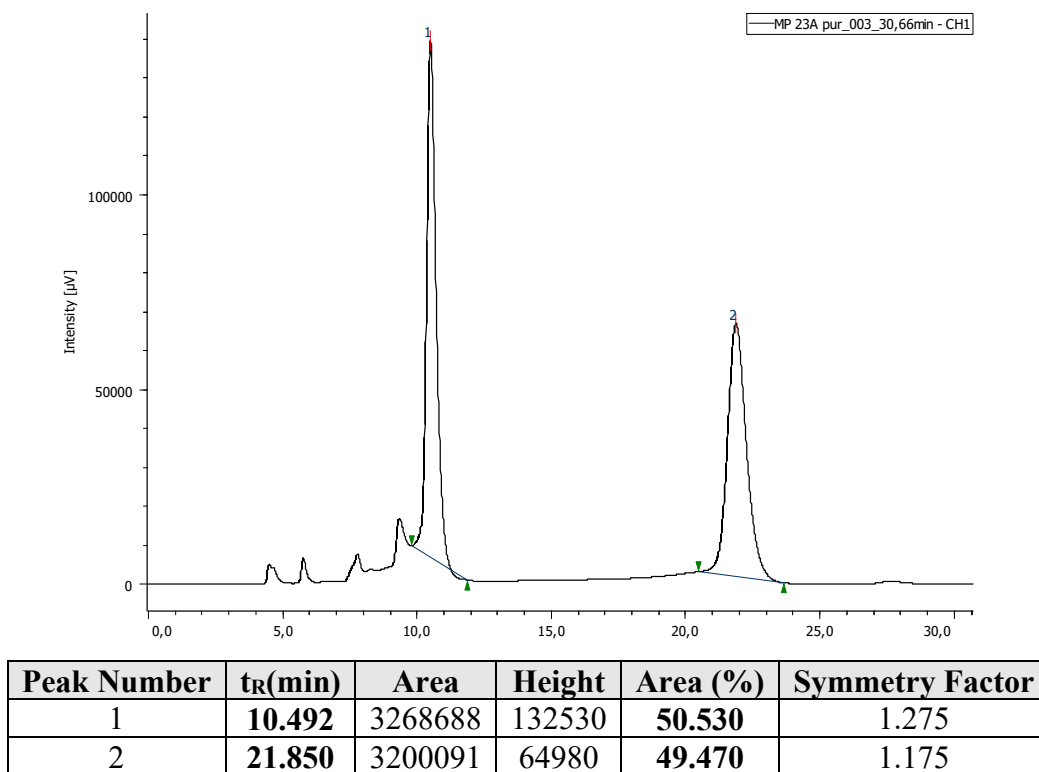

**Figure S56.** HPLC profile for **3b** (racemic).

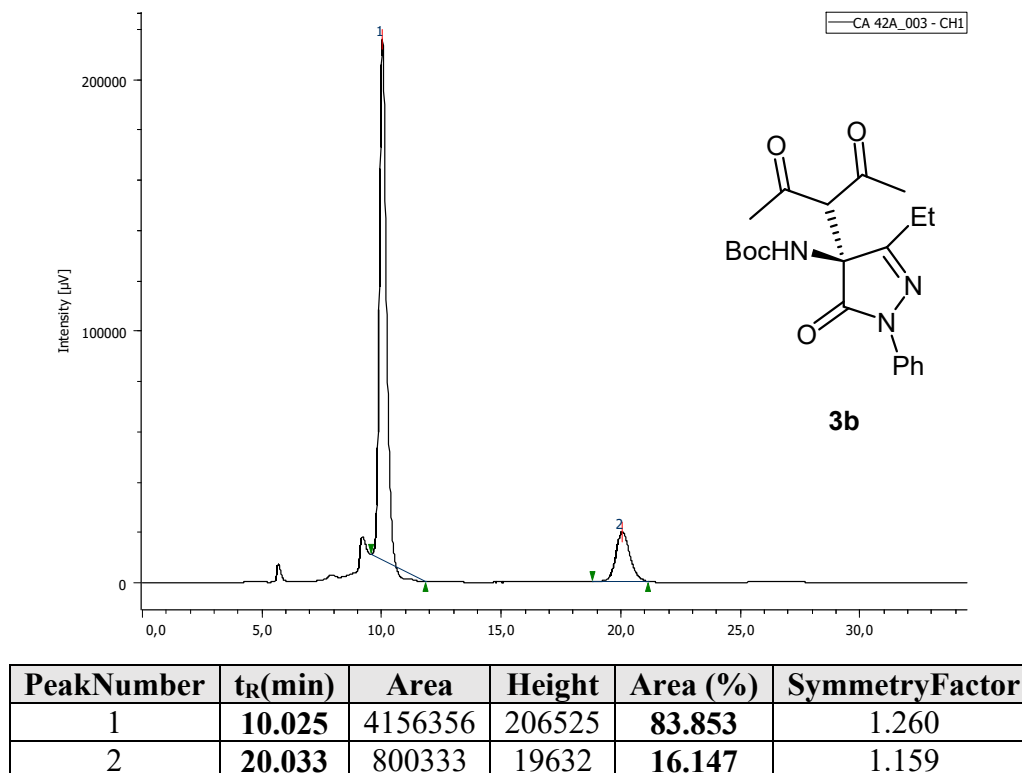

**Figure S57.** HPLC Profile for **3b** compound. Scheme 2, er 84:16.

***tert*-Butyl (S)-(4-(2,4-dioxopentan-3-yl)-3-isopropyl-5-oxo-1-phenyl-4,5-dihydro-1*H*-pyrazol-4-yl)carbamate (3c).**

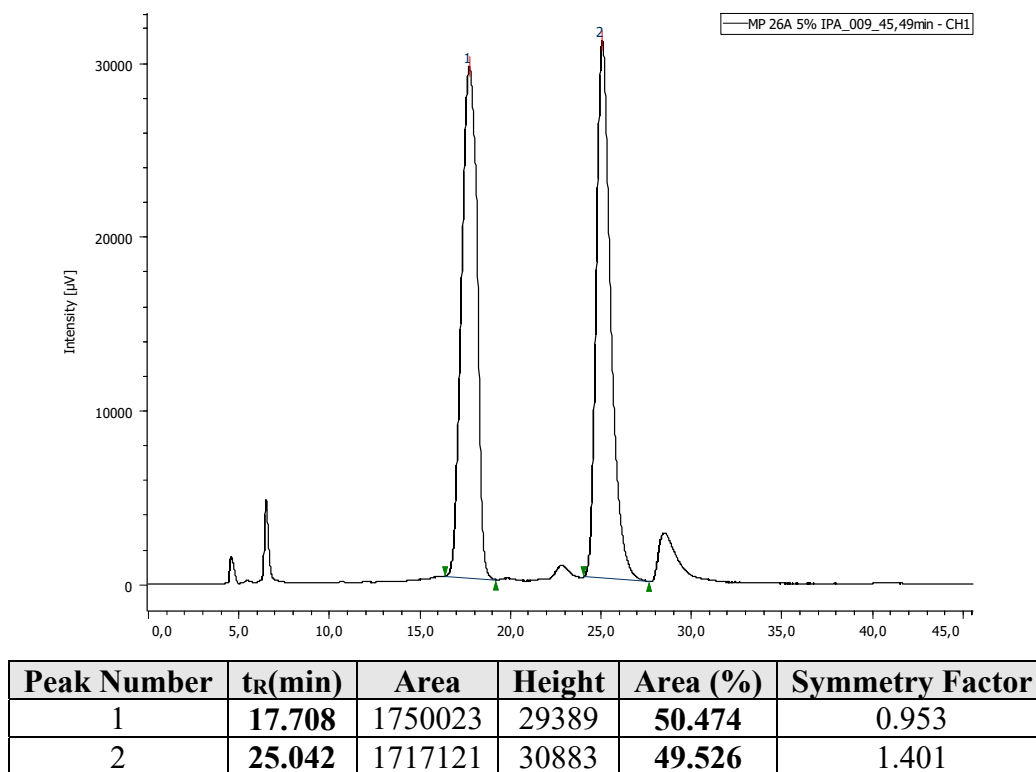

**Figure S58.** HPLC profile for **3c** (racemic).

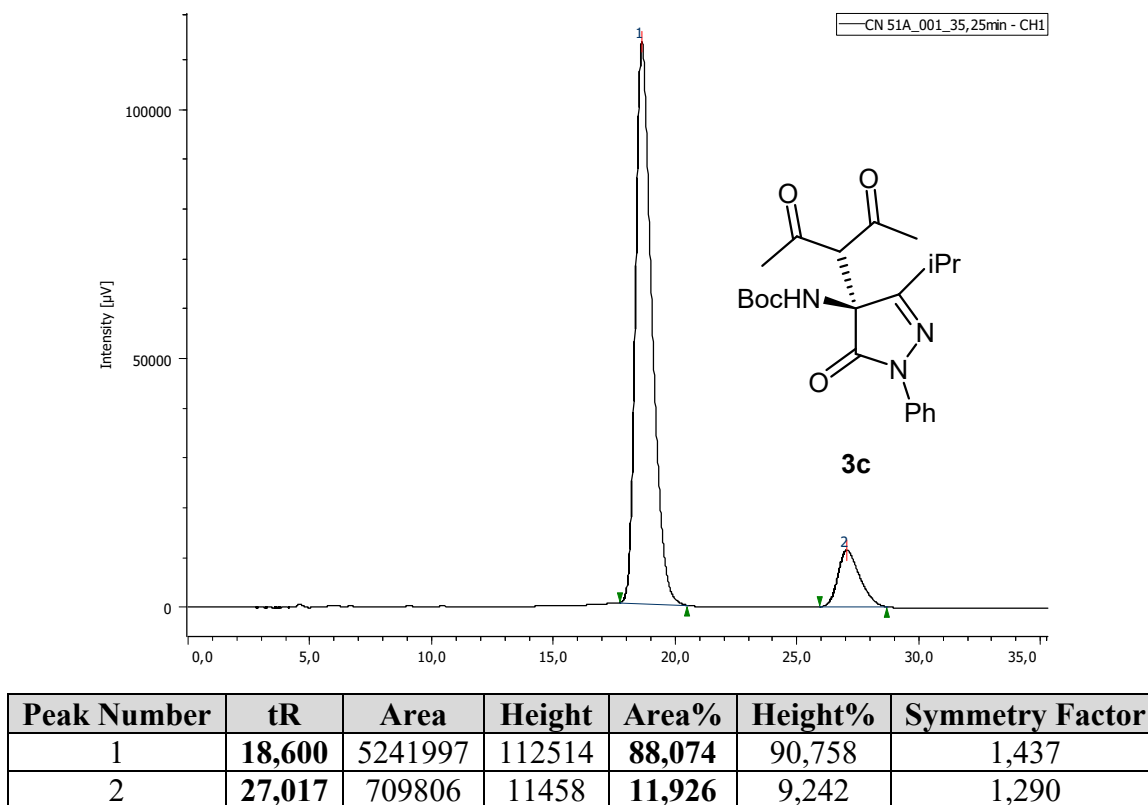

**Figure S59.** HPLC Profile for **3c** compound. Scheme 2, er 88:12.

***tert*-Butyl (S)-(4-(2,4-dioxopentan-3-yl)-5-oxo-1,3-diphenyl-4,5-dihydro-1*H*-pyrazol-4-yl)carbamate (3e).**

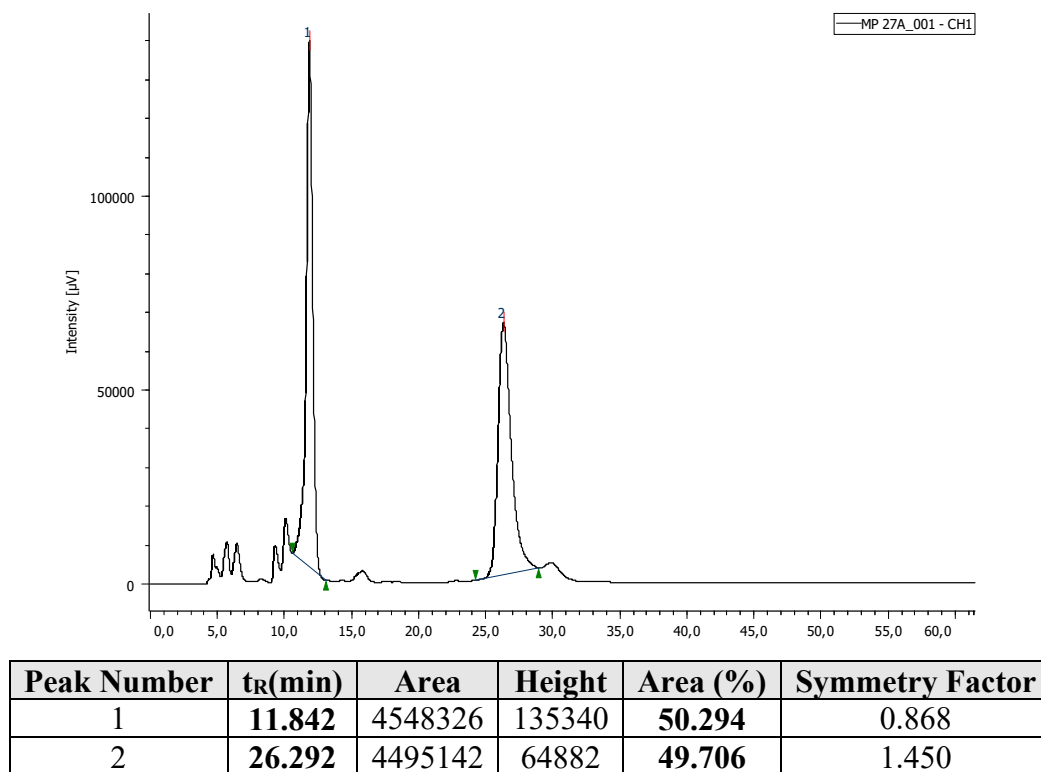

**Figure S60.** HPLC profile for **3e** (racemic).

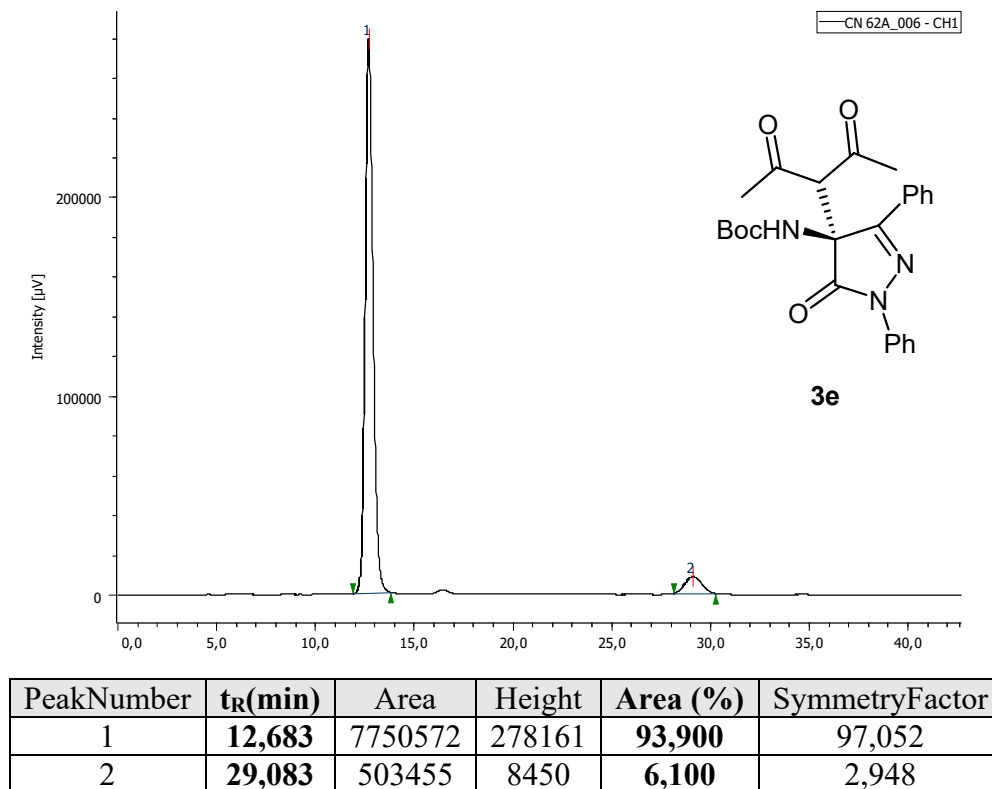

**Figure S61.** HPLC Profile for **3e** compound. Scheme 2, er 94:6.

***tert*-Butyl (S)-(1-(4-Chlorophenyl)-4-(2,4-dioxopentan-3-yl)-3-methyl-5-oxo-4,5-dihydro-1*H*-pyrazol-4-yl)carbamate (3f).**

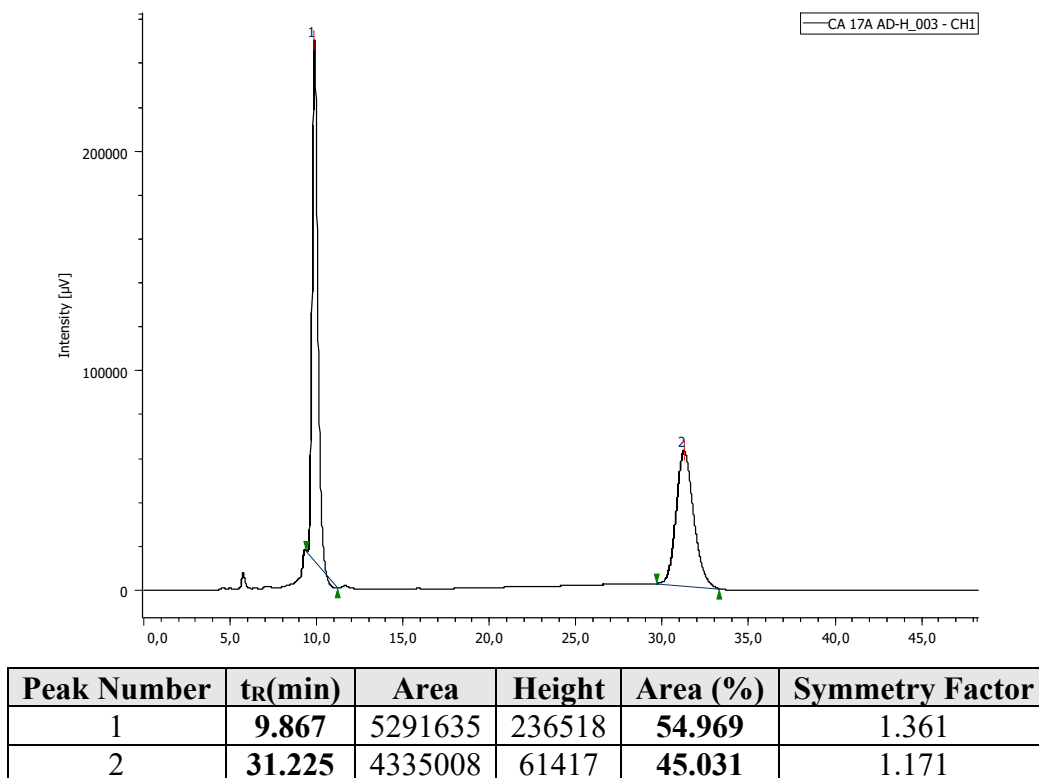

**Figure S62.** HPLC profile for **3f** (racemic).

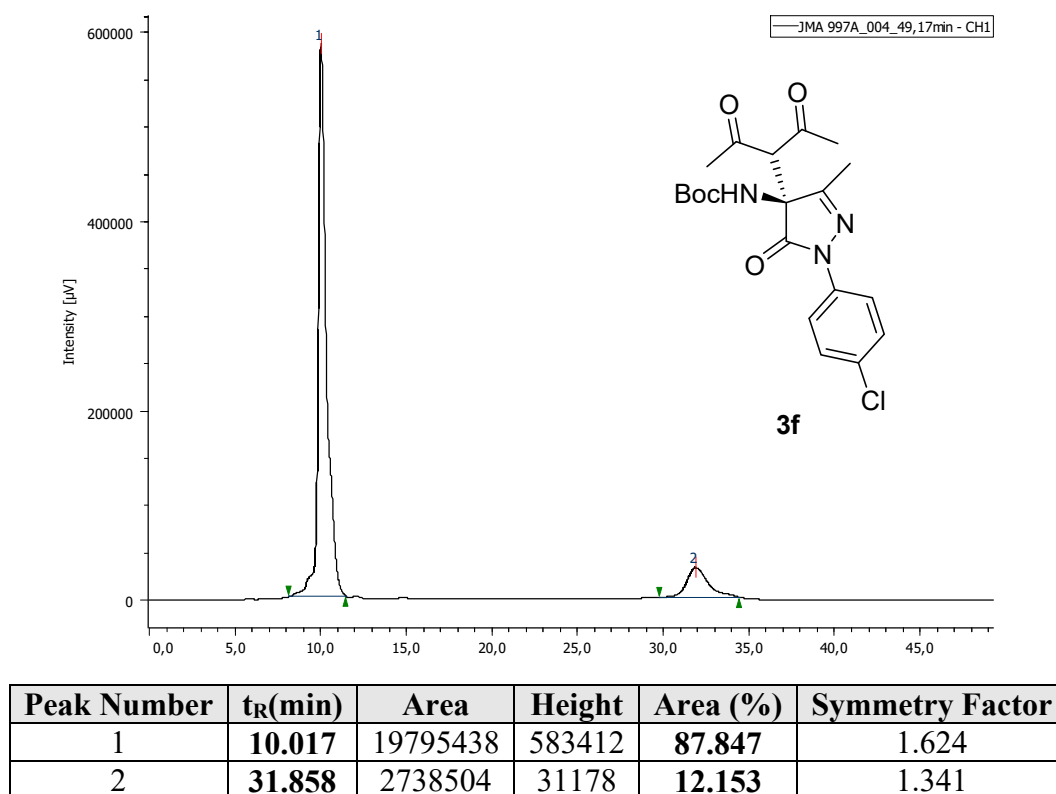

**Figure S63.** HPLC Profile for **3f** compound. Scheme 2, er 88:12.

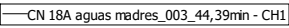

**3f**

***tert*-Butyl (S)-(4-(2,4-dioxopentan-3-yl)-3-methyl-5-oxo-1-(*p*-tolyl)-4,5-dihydro-1*H*-pyrazol-4-yl)carbamate (3g).**

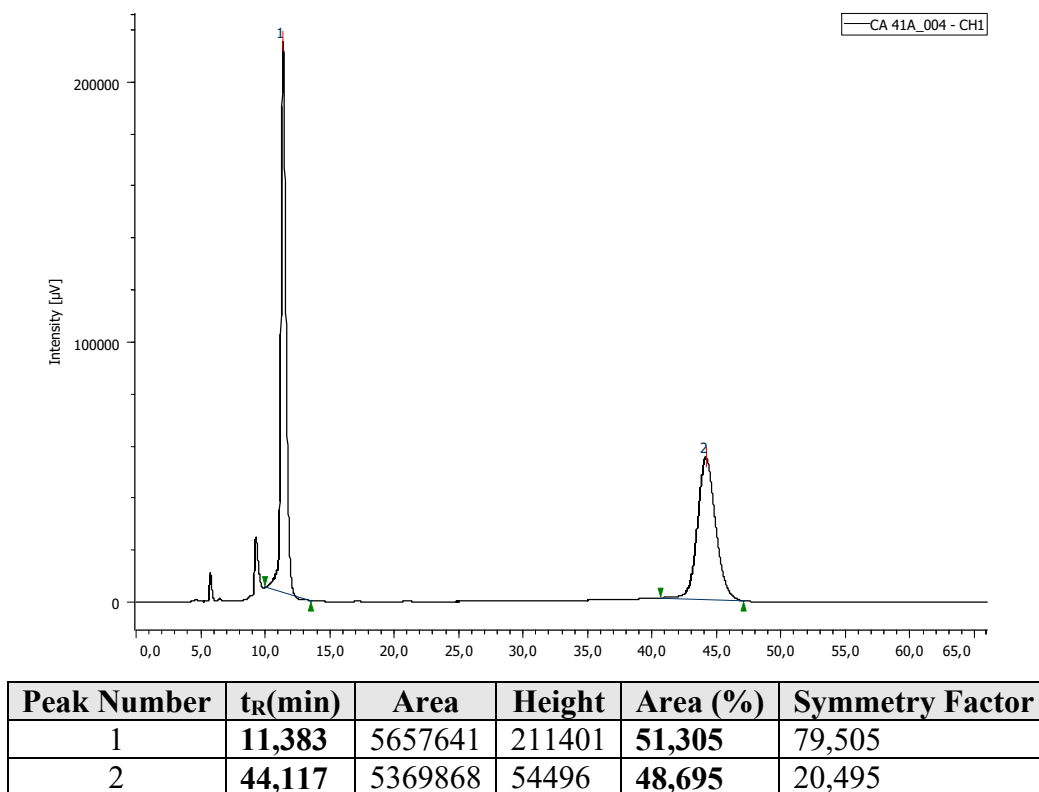

**Figure S65.** HPLC profile for **3g** (racemic).

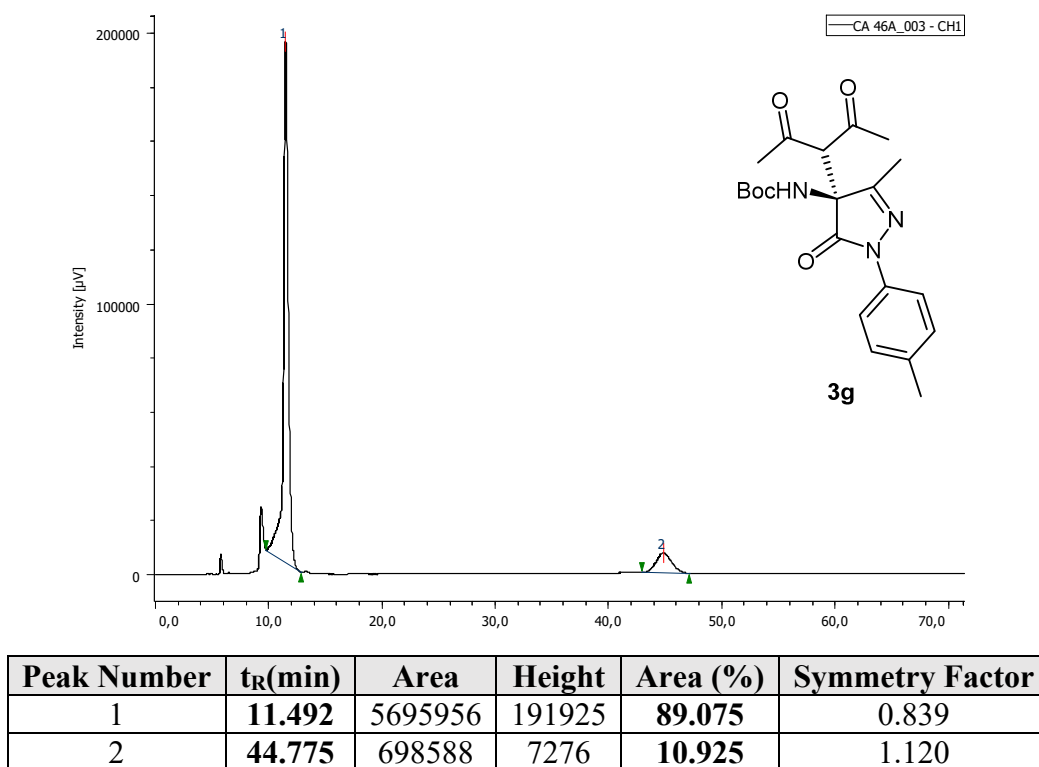

**Figure S66.** HPLC Profile for **3g** compound. Scheme 2, er 89:11.

***tert*-Butyl (S)-(4-(3,5-dioxoheptan-4-yl)-3-methyl-5-oxo-1-phenyl-4,5-dihydro-1*H*-pyrazol-4-yl)carbamate (**3h**).**

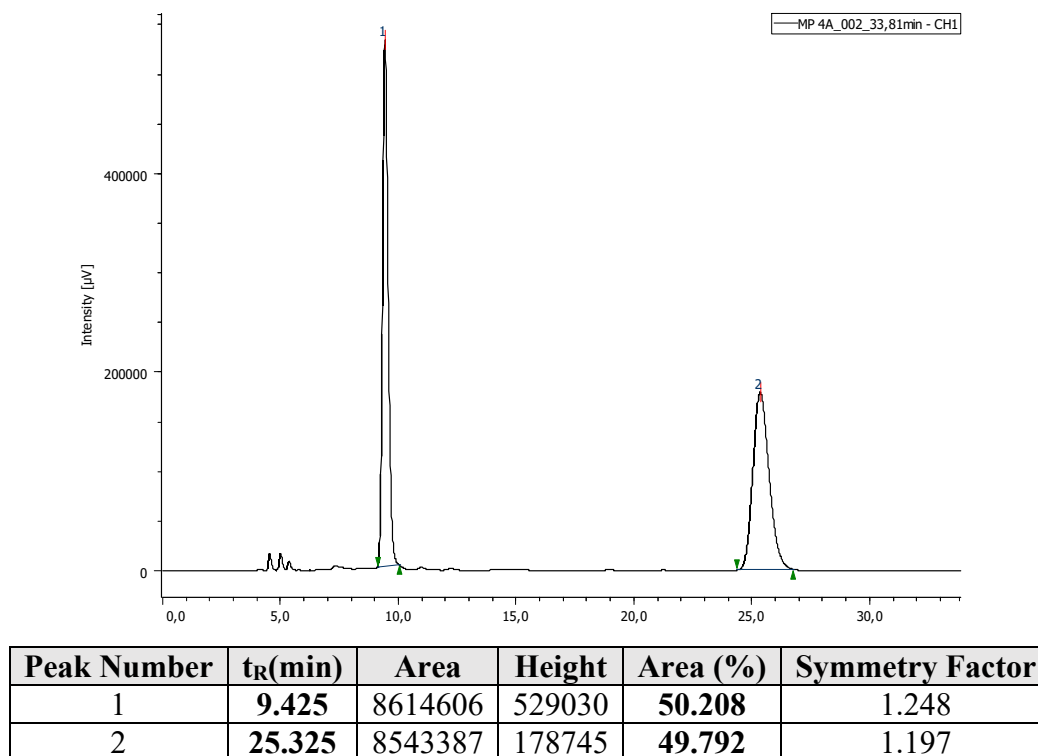

**Figure S67.** HPLC profile for **3h** (racemic).

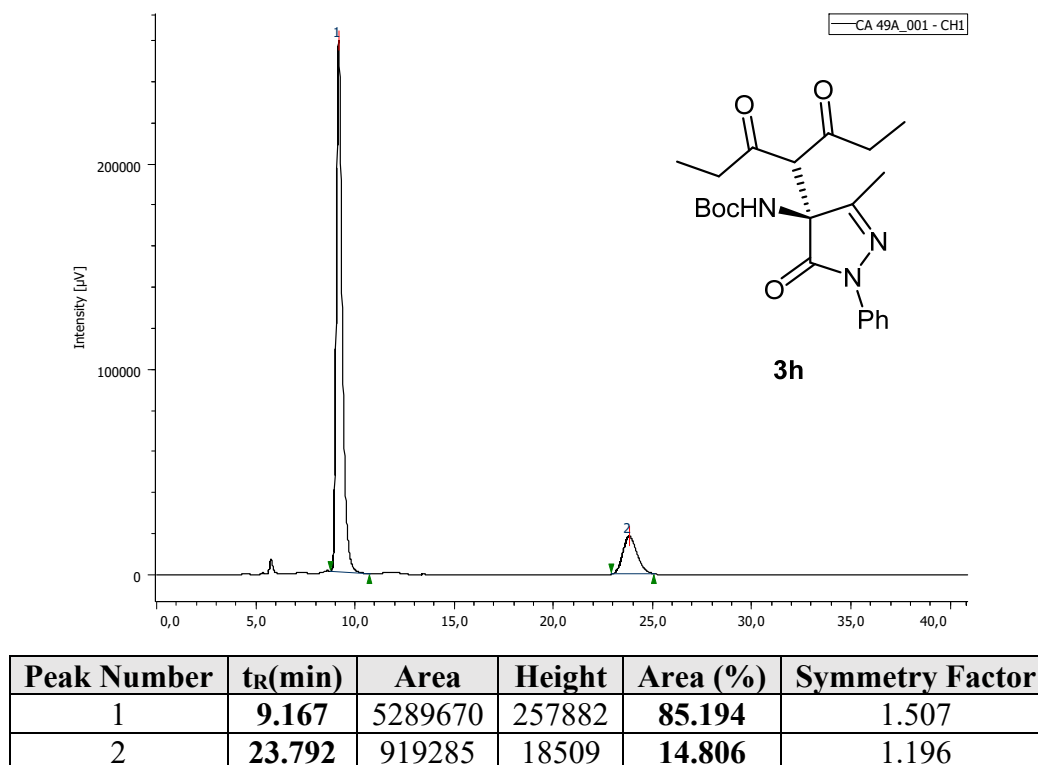

**Figure S68.** HPLC Profile for **3h** compound. Scheme 2, er 85:15.

***tert*-Butyl (S)-(4-(1,3-dioxo-1,3-diphenylpropan-2-yl)-3-methyl-5-oxo-1-phenyl-4,5-dihydro-1*H*-pyrazol-4-yl)carbamate (**3i**).**

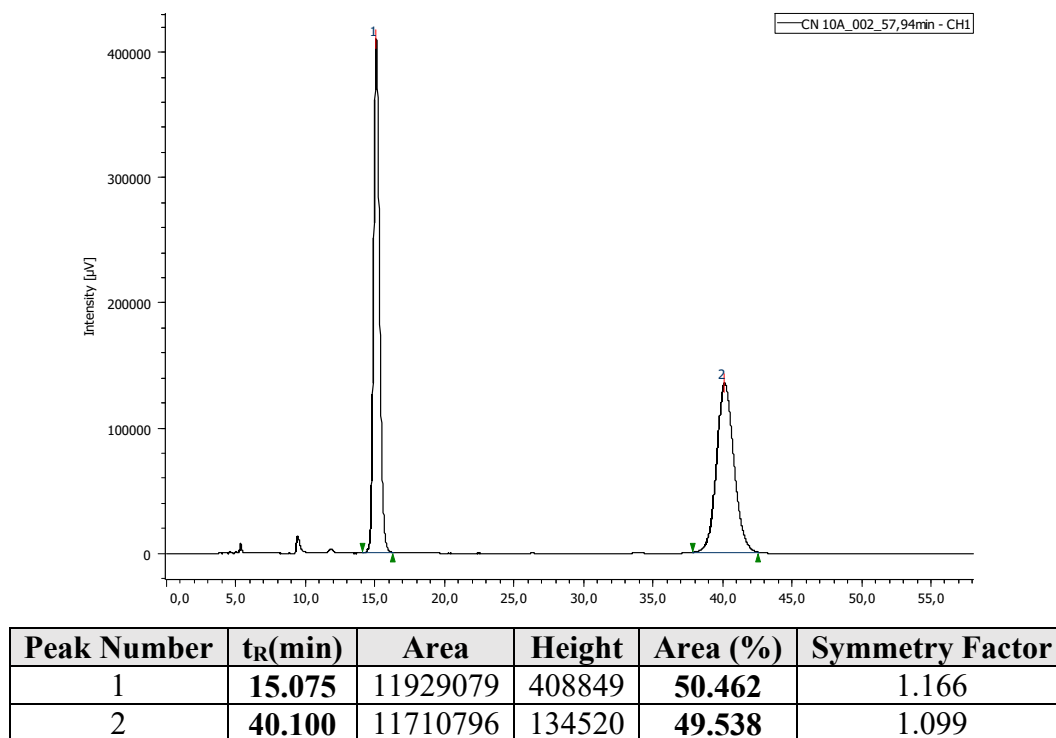

**Figure S69.** HPLC profile for **3i** (racemic).

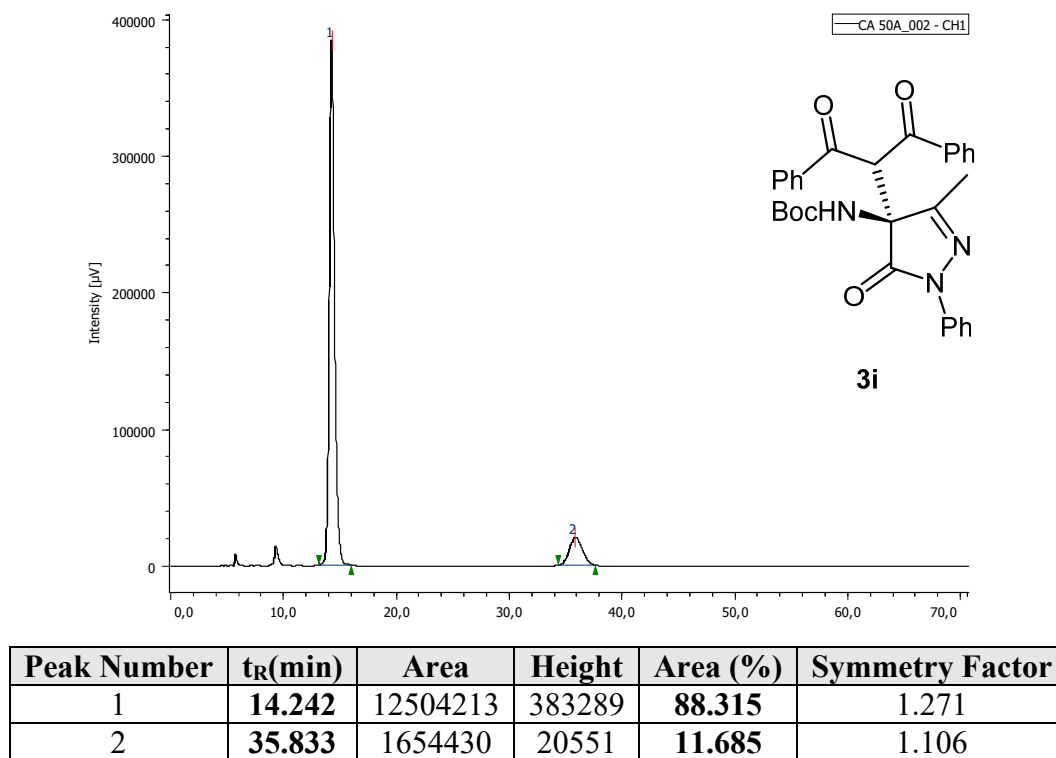

**Figure S70.** HPLC Profile for **3i** compound. Scheme 2, er 88:12.



***tert*-Butyl (S)-(4-(3,5-dioxoheptan-4-yl)-5-oxo-1,3-diphenyl-4,5-dihydro-1*H*-pyrazol-4-yl)carbamate (**3j**).**

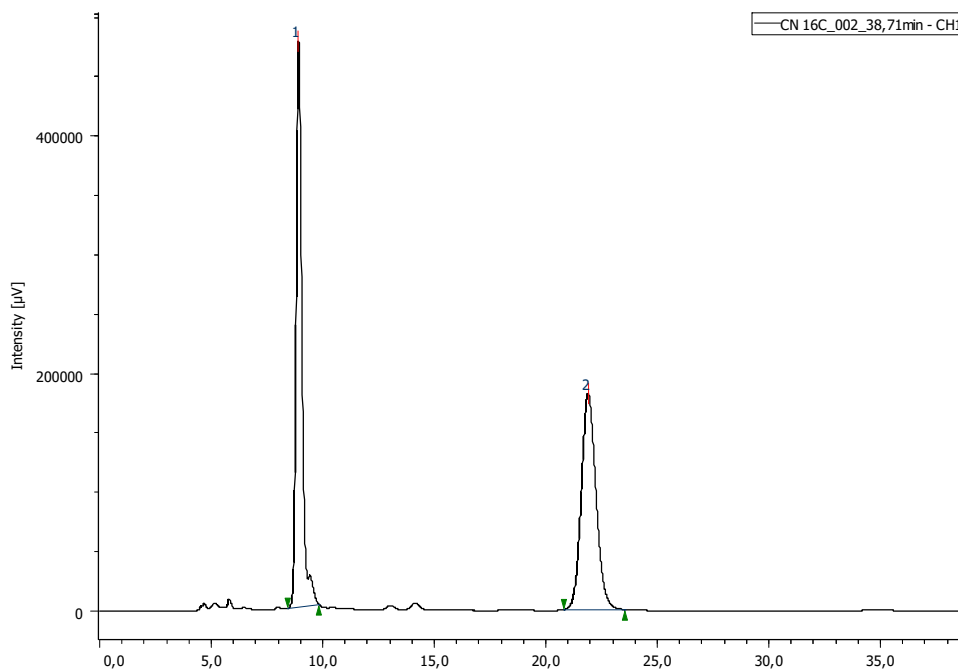

| Peak Number | tR     | Area    | Height | Area%  | Height% | Symmetry Factor |
|-------------|--------|---------|--------|--------|---------|-----------------|
| 1           | 8,908  | 8625302 | 476025 | 50,756 | 72,324  | 1,599           |
| 2           | 21,867 | 8368363 | 182162 | 49,244 | 27,676  | 1,118           |

**Figure S71.** HPLC profile for **3j** (racemic).

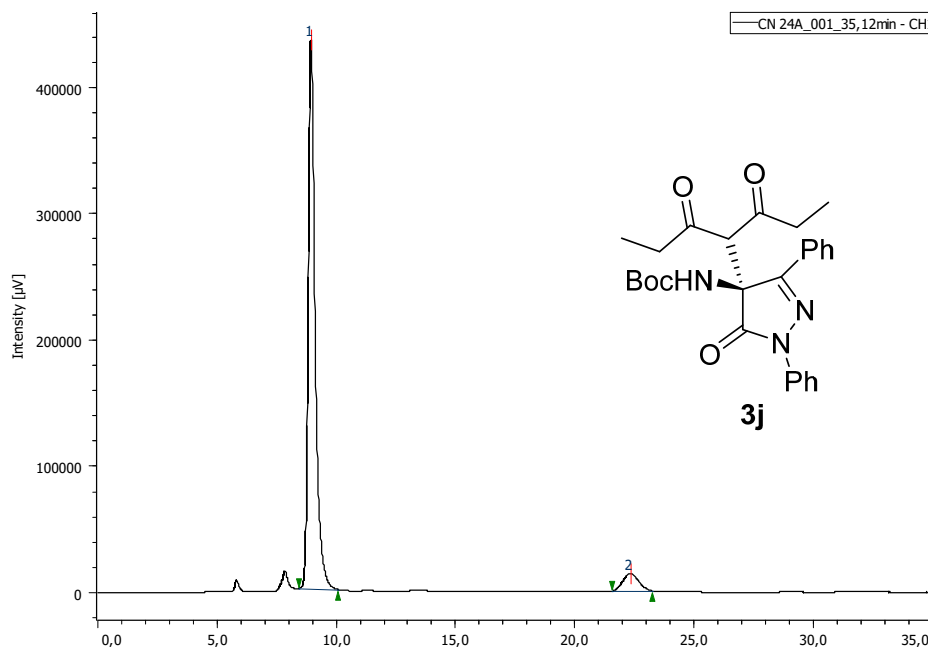

| Peak Number | tR     | Area    | Height | Area%  | Height% | Symmetry Factor |
|-------------|--------|---------|--------|--------|---------|-----------------|
| 1           | 8,933  | 8714793 | 433523 | 93,270 | 96,913  | 1,473           |
| 2           | 22,308 | 628810  | 13809  | 6,730  | 3,087   | 1,093           |

**Figure S72.** HPLC Profile for **3j** compound. Scheme 2, er 93:7.

***tert*-Butyl (S)-(4-(1,3-dioxo-1,3-diphenylpropan-2-yl)-5-oxo-1,3-diphenyl-4,5-dihydro-1*H*-pyrazol-4-yl)carbamate (3k).**

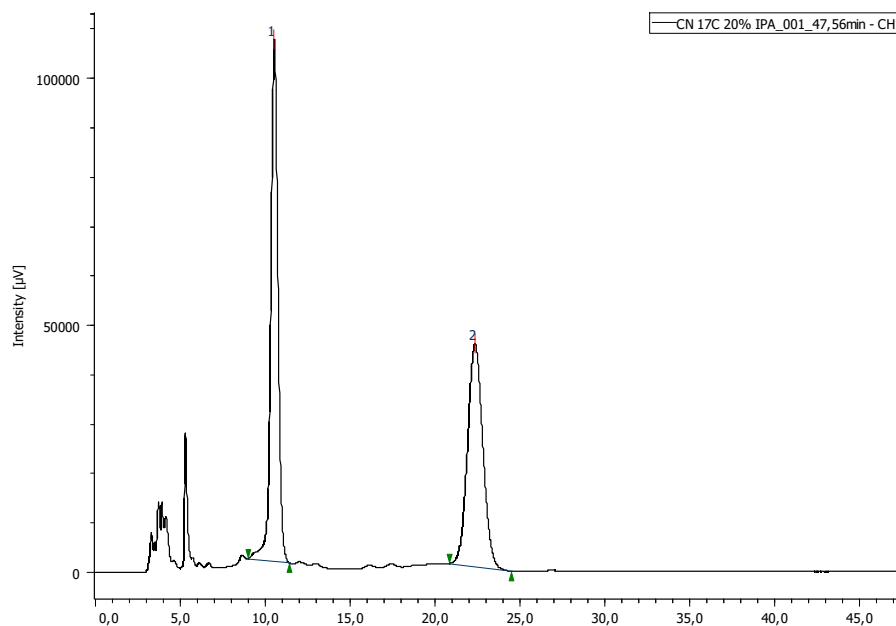

| Peak Number | tR     | Area    | Height | Area%  | Height% | Symmetry Factor |
|-------------|--------|---------|--------|--------|---------|-----------------|
| 1           | 10,517 | 3074291 | 105439 | 52,217 | 70,114  | 1,020           |
| 2           | 22,317 | 2813199 | 44943  | 47,783 | 29,886  | 1,060           |

**Figure S73.** HPLC profile for **3k** (racemic).

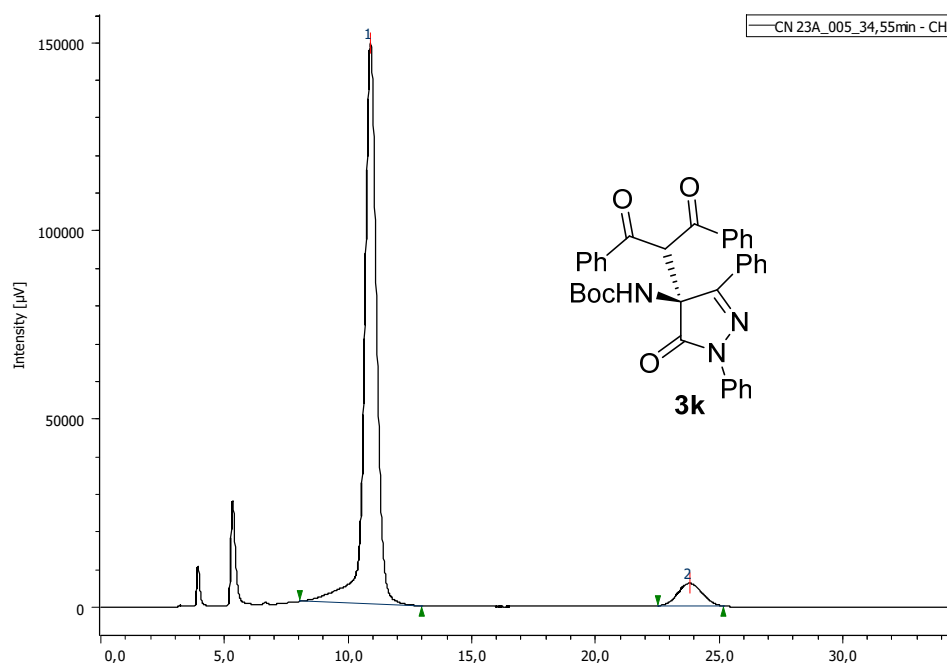

| Peak Number | tR     | Area    | Height | Area%  | Height% | Symmetry Factor |
|-------------|--------|---------|--------|--------|---------|-----------------|
| 1           | 10,892 | 5164528 | 148763 | 92,597 | 96,113  | 1,004           |
| 2           | 23,792 | 412913  | 6017   | 7,403  | 3,887   | 1,032           |

**Figure S74.** HPLC Profile for **3k** compound. Scheme 2, er 93:7.

***tert*-Butyl (S)-(4-(2,4-dioxopentan-3-yl)-1-methyl-5-oxo-3-phenyl-4,5-dihydro-1*H*-pyrazol-4-yl)carbamate (3l).**

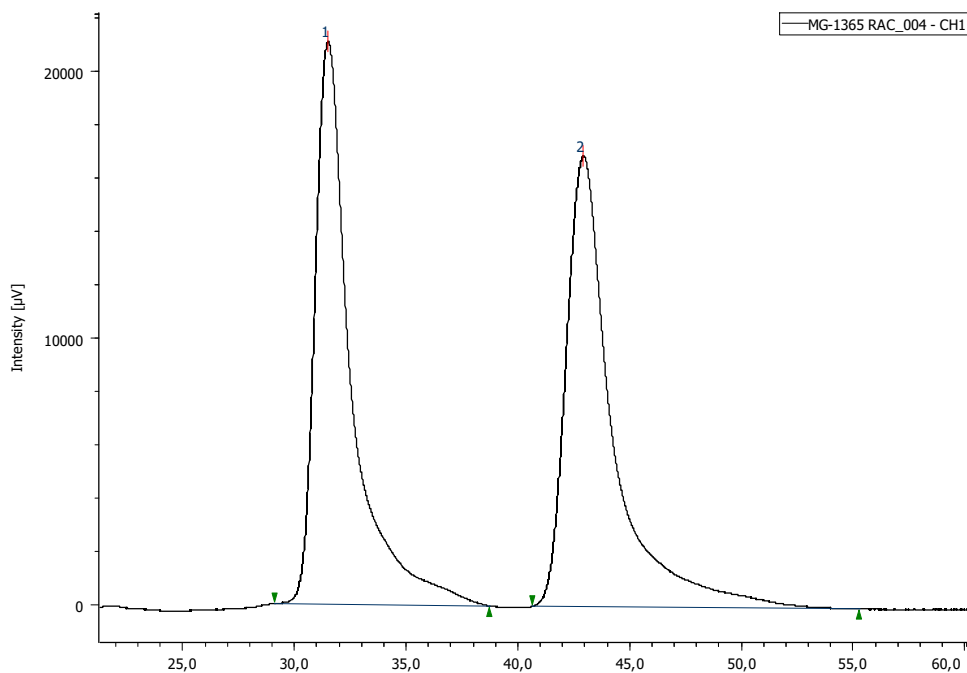

| Peak Number | t <sub>R</sub> (min) | Area    | Height | Area (%) | Symmetry Factor |
|-------------|----------------------|---------|--------|----------|-----------------|
| 1           | 31,500               | 2377916 | 21054  | 49,268   | 2,110           |
| 2           | 42,900               | 2448559 | 16867  | 50,732   | 2,115           |

**Figure S75.** HPLC profile for **3l** (racemic).

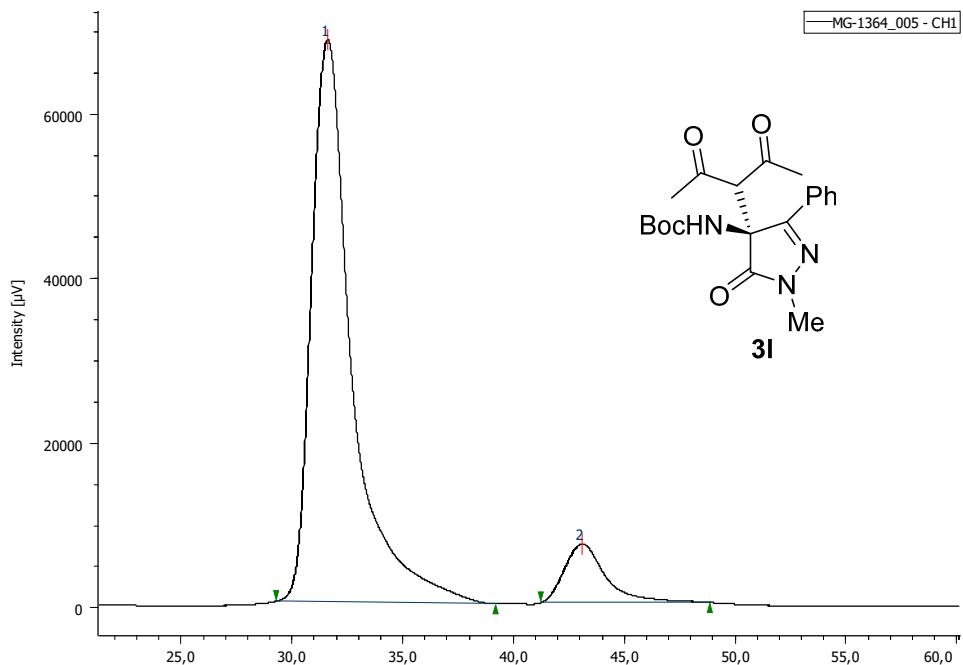

| Peak Number | t <sub>R</sub> (min) | Area    | Height | Area (%) | Symmetry Factor |
|-------------|----------------------|---------|--------|----------|-----------------|
| 1           | 31,608               | 8642626 | 68202  | 90,288   | 1,851           |
| 2           | 43,067               | 929657  | 7151   | 9,712    | 1,601           |

**Figure S76.** HPLC Profile for **3l** compound. Scheme 2, er 90:10.

***tert*-Butyl (S)-(3,3',5-trimethyl-5'-oxo-1'-phenyl-1',5'-dihydro-1*H*,4'*H*-[4,4'-bipyrazol]-4'-yl)carbamate (4a).**

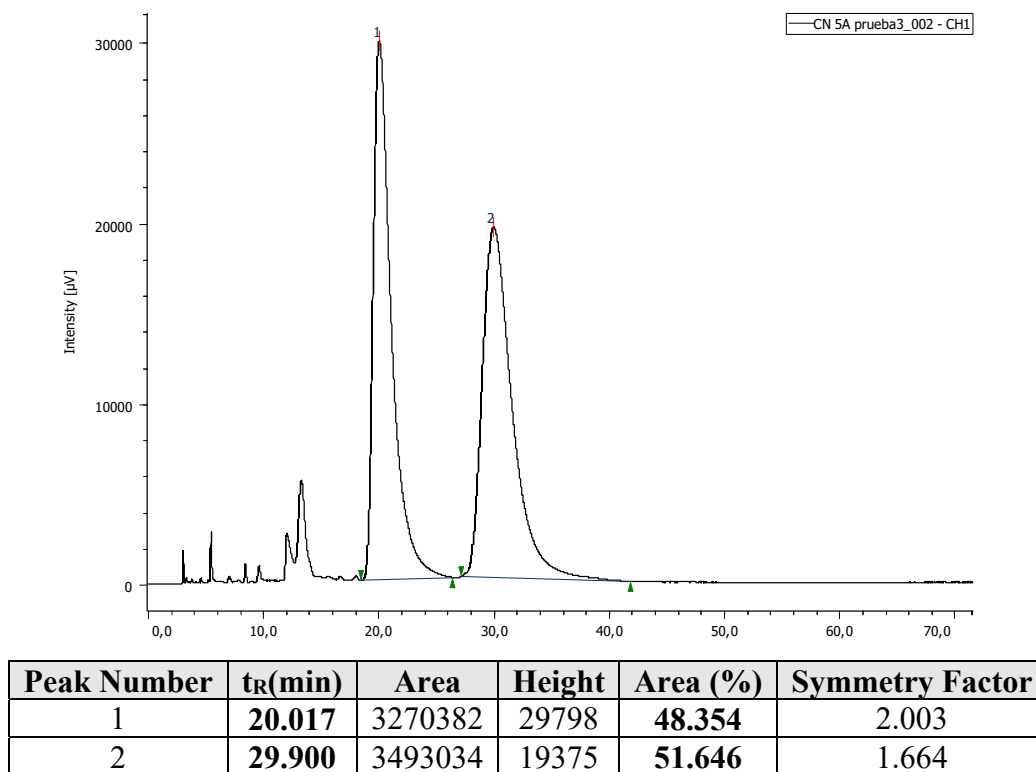

**Figure S77.** HPLC profile for **4a** (racemic).

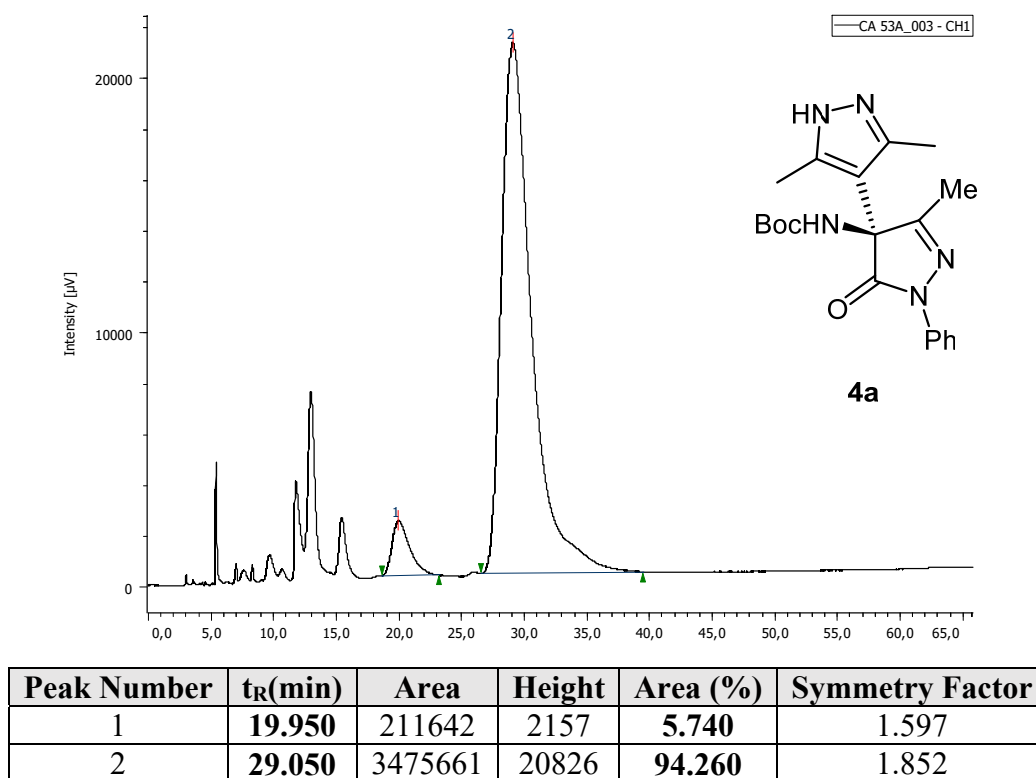

**Figure S78.** HPLC Profile for **4a** compound. Scheme 3, er 94:6.

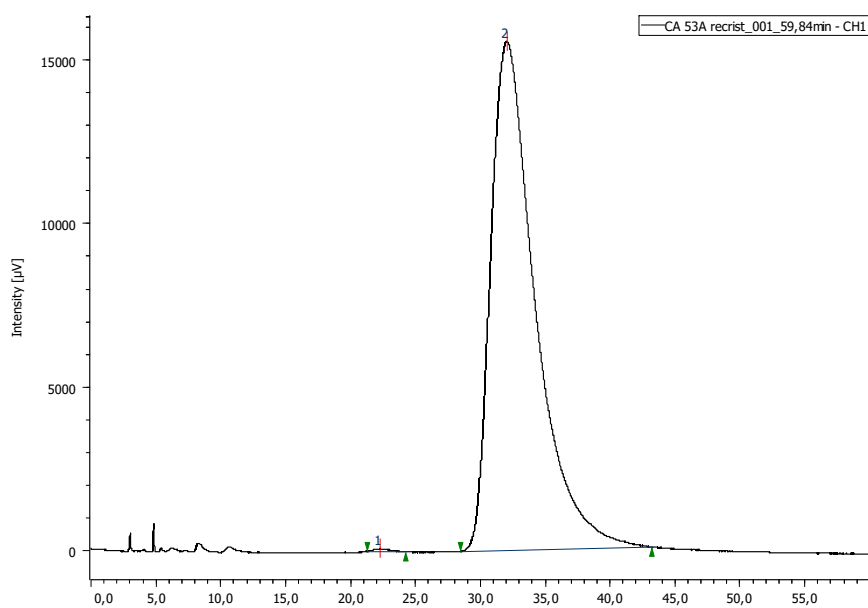

| PeakNumber | t <sub>R</sub> (min) | Area    | Height (µV) | Area (%) | SymmetryFactor |
|------------|----------------------|---------|-------------|----------|----------------|
| 1          | 22,233               | 6459    | 81          | 0,175    | 0,521          |
| 2          | 32,008               | 3693654 | 15551       | 99,825   | 99,479         |

**Figure S79.** HPLC Profile for **4a** after recrystallization. er  $\geq$  99:1.

***tert*-Butyl (S)-(3'-ethyl-3,5-dimethyl-5'-oxo-1'-phenyl-1',5'-dihydro-1*H*,4'*H*-[4,4'-bipyrazol]-4'-yl)carbamate (4b).**

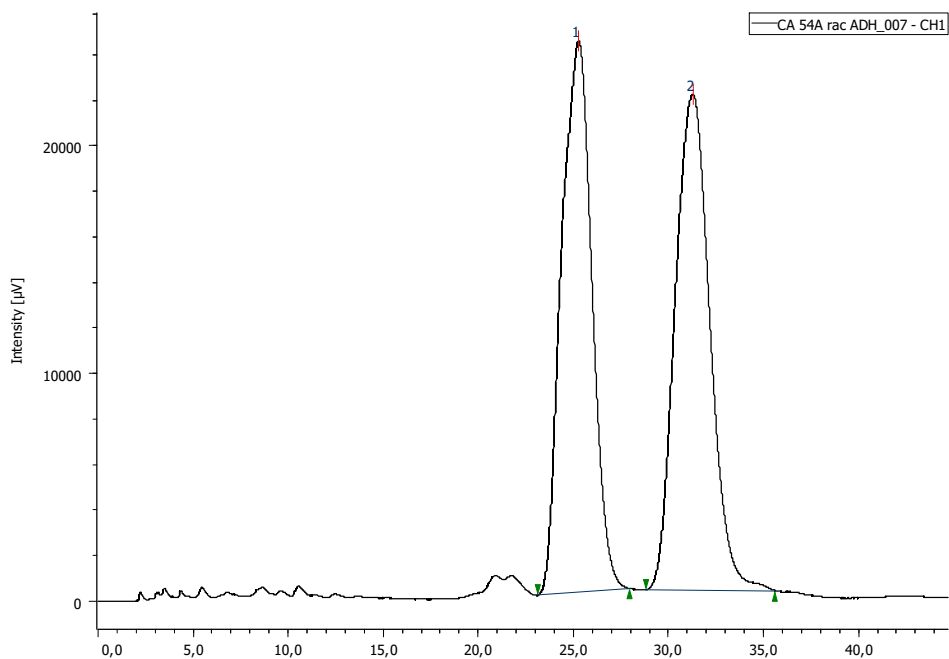

| Peak Number | tR     | Area    | Height | Area%  | Height% | Symmetry Factor |
|-------------|--------|---------|--------|--------|---------|-----------------|
| 1           | 25,242 | 2685984 | 24175  | 49,291 | 52,631  | 1,011           |
| 2           | 31,242 | 2763309 | 21758  | 50,709 | 47,369  | 1,098           |

**Figure S80.** HPLC profile for **4b** (racemic).

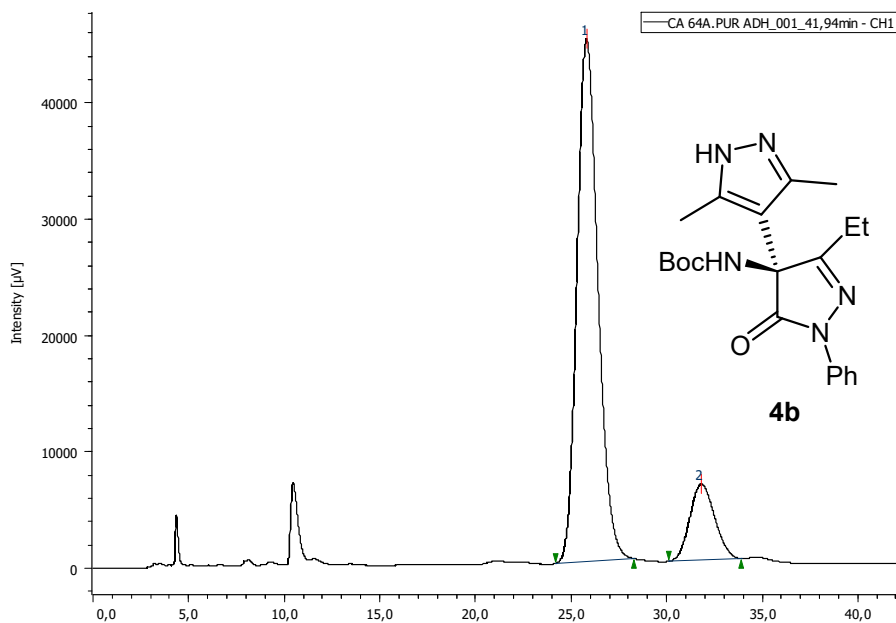

| Peak Number | tR     | Area    | Height | Area%  | Height% | Symmetry Factor |
|-------------|--------|---------|--------|--------|---------|-----------------|
| 1           | 25,767 | 3406140 | 44845  | 85,215 | 87,294  | 1,200           |
| 2           | 31,767 | 590969  | 6528   | 14,785 | 12,706  | 1,122           |

**Figure S81.** HPLC Profile for **4b** compound. Scheme 3, er 85:15.

***tert*-Butyl (S)-( 3'-isopropyl-3,5-dimethyl-5'-oxo-1'-phenyl-1',5'-dihydro-1*H*,4'*H*-[4,4'-bipyrazol]-4'-yl)carbamate (4c).**

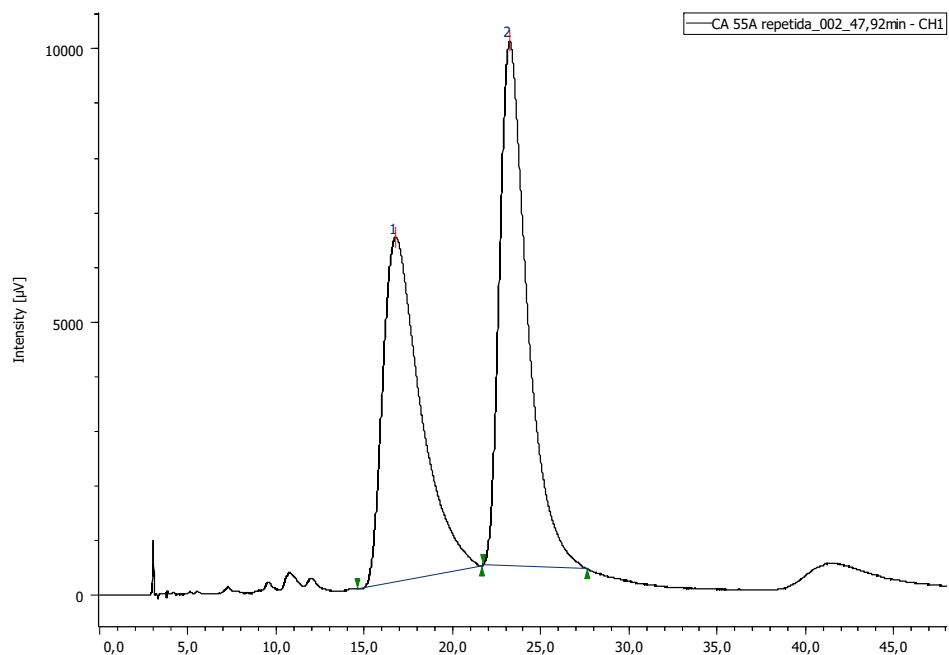

| Peak Name | tR     | Area   | Height | Area%  | Height% | Symmetry Factor |
|-----------|--------|--------|--------|--------|---------|-----------------|
| 1         | 16,775 | 934391 | 6310   | 48,848 | 40,085  | 1,837           |
| 2         | 23,200 | 978461 | 9432   | 51,152 | 59,915  | 1,588           |

**Figure S82.** HPLC profile for **4c** (racemic).

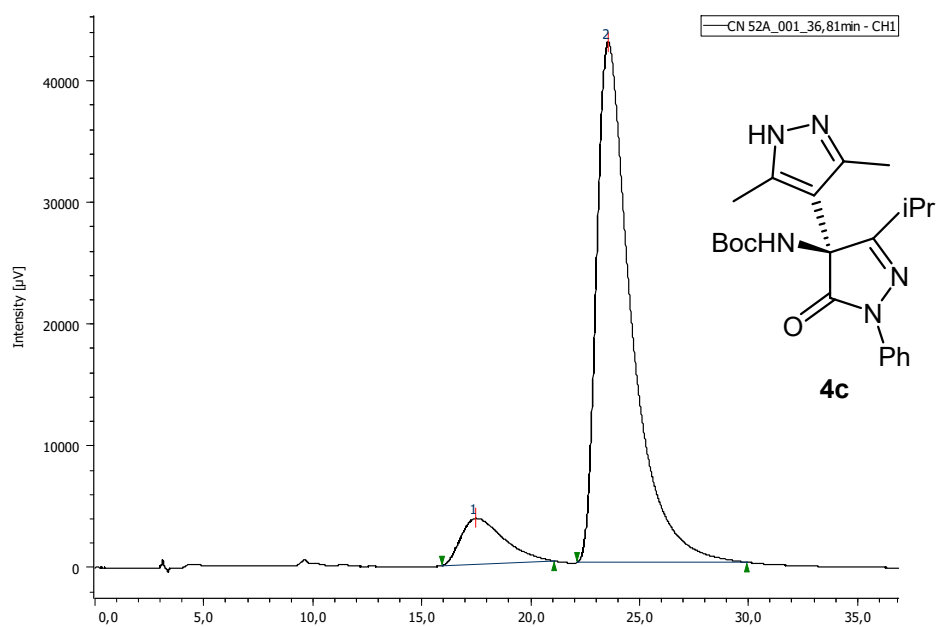

| Peak Number | tR     | Area    | Height | Area%  | Height% | Symmetry Factor |
|-------------|--------|---------|--------|--------|---------|-----------------|
| 1           | 17,475 | 515449  | 3760   | 9,790  | 8,094   | 1,660           |
| 2           | 23,533 | 4749472 | 42690  | 90,210 | 91,906  | 1,998           |

**Figure S83.** HPLC Profile for **4c** compound. Scheme 3, er 90:10.

*tert*-Butyl (S)-(3,5-dimethyl-5'-oxo-1',3'-diphenyl-1',5'-dihydro-1*H*,4'*H*-[4,4'-bipyrazol]-4'-yl)carbamate (**4e**).

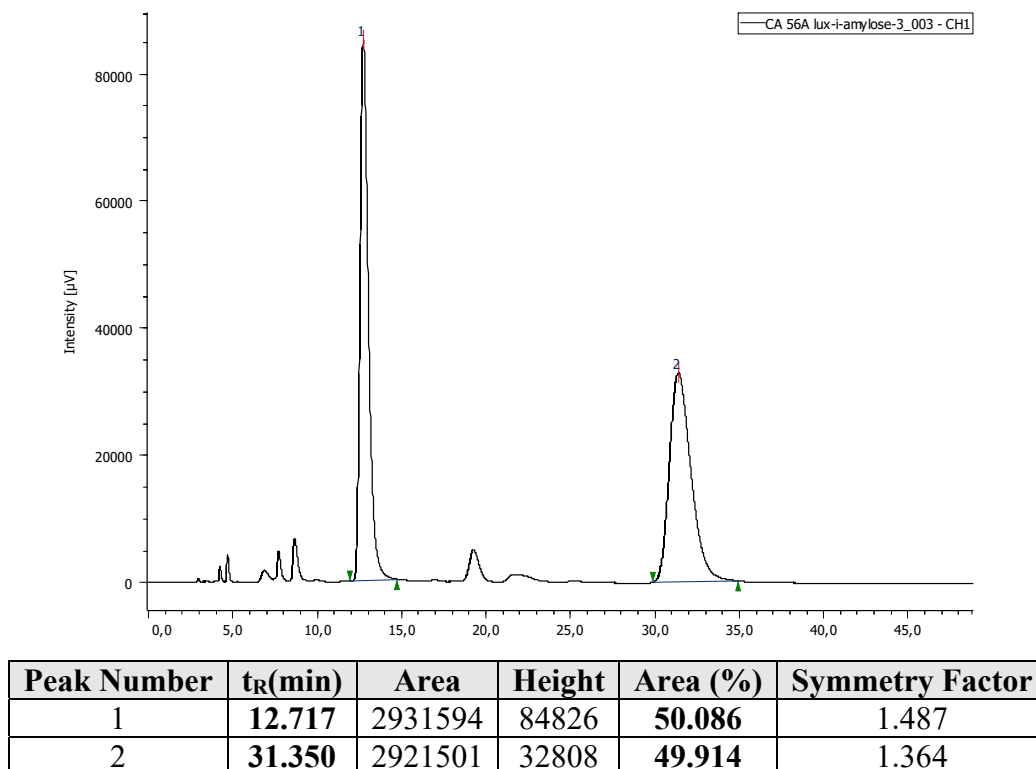

**Figure S84.** HPLC profile for **4e** (racemic).

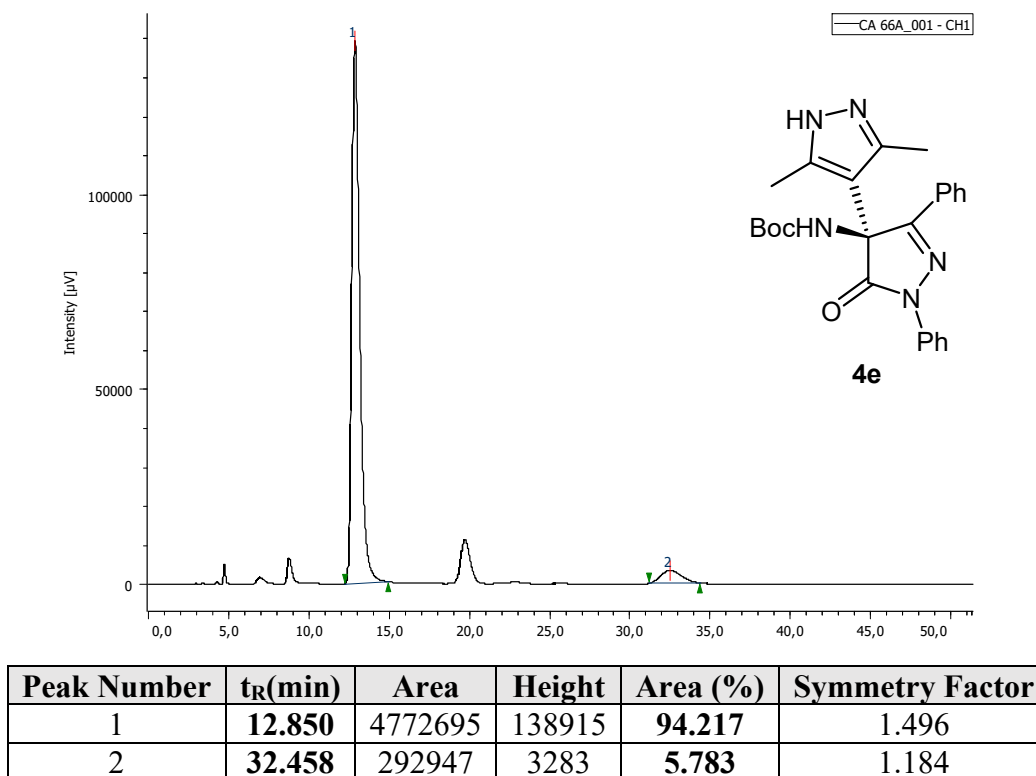

**Figure S85.** HPLC Profile for **4e** compound. Scheme 3, er 94:6.



*tert*-Butyl (S)-(1'-(4-chlorophenyl)-3,3',5-trimethyl-5'-oxo-1',5'-dihydro-1*H*,4'*H*-[4,4'-bipyrazol]-4'-yl)carbamate (**4f**).

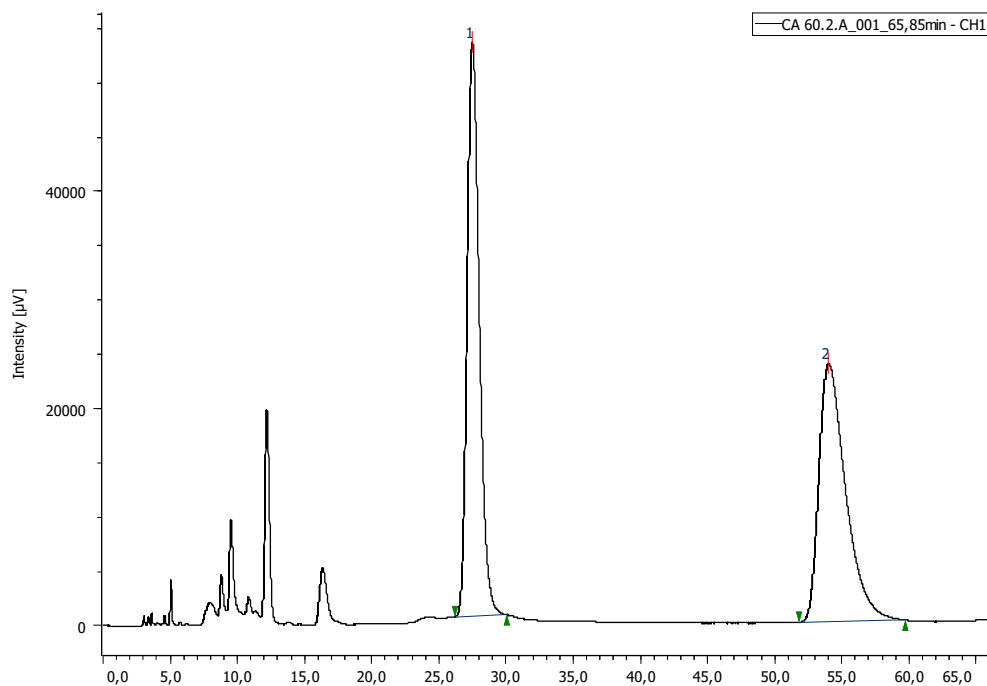

| Peak Number | t <sub>R</sub> (min) | Area    | Height | Area (%) | Symmetry Factor |
|-------------|----------------------|---------|--------|----------|-----------------|
| 1           | 27,467               | 3337320 | 52765  | 50,307   | 1,272           |
| 2           | 53,942               | 3296547 | 23760  | 49,693   | 1,652           |

**Figure S86.** HPLC profile for **4f** (racemic).

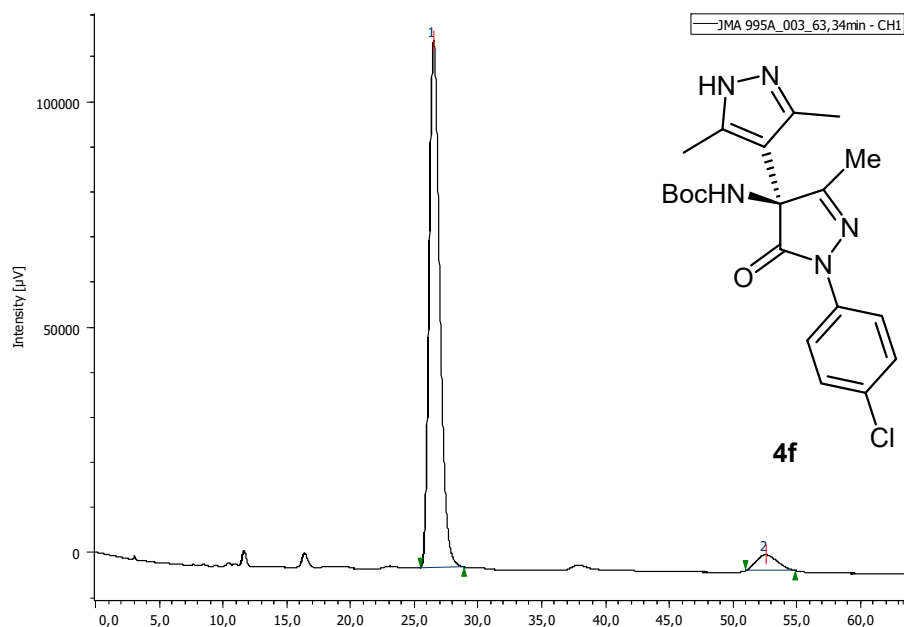

| Peak Number | t <sub>R</sub> (min) | Area    | Height | Area (%) | Symmetry Factor |
|-------------|----------------------|---------|--------|----------|-----------------|
| 1           | 26,483               | 6760936 | 116665 | 94,340   | 1,327           |
| 2           | 52,483               | 405643  | 3514   | 5,660    | 1,230           |

**Figure S87.** HPLC Profile for **4f** compound. Scheme 3, er 94:6.

***tert*-Butyl (S)-(3,3',5-trimethyl-5'-oxo-1'-(*p*-tolyl)-1',5'-dihydro-1*H*,4'*H*-[4,4'-bipyrazol]-4'-yl)carbamate (4g).**

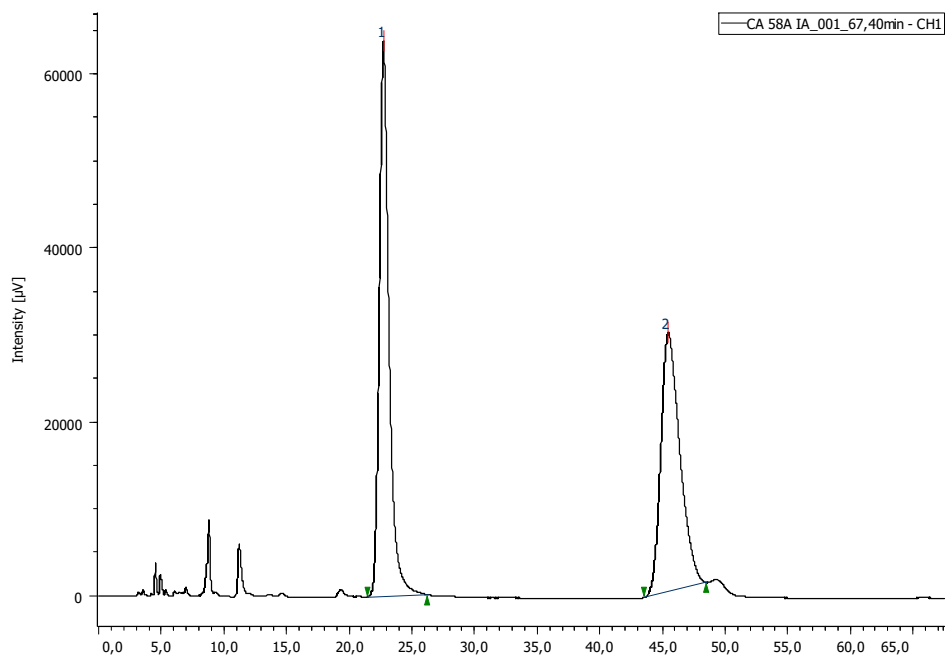

| Peak Number | tR     | Area    | Height | Area%  | Height% | Symmetry Factor |
|-------------|--------|---------|--------|--------|---------|-----------------|
| 1           | 22,700 | 3206770 | 62887  | 50,486 | 67,922  | 1,266           |
| 2           | 45,425 | 3145023 | 29700  | 49,514 | 32,078  | 1,360           |

**Figure S88.** HPLC profile for **4g** (racemic).

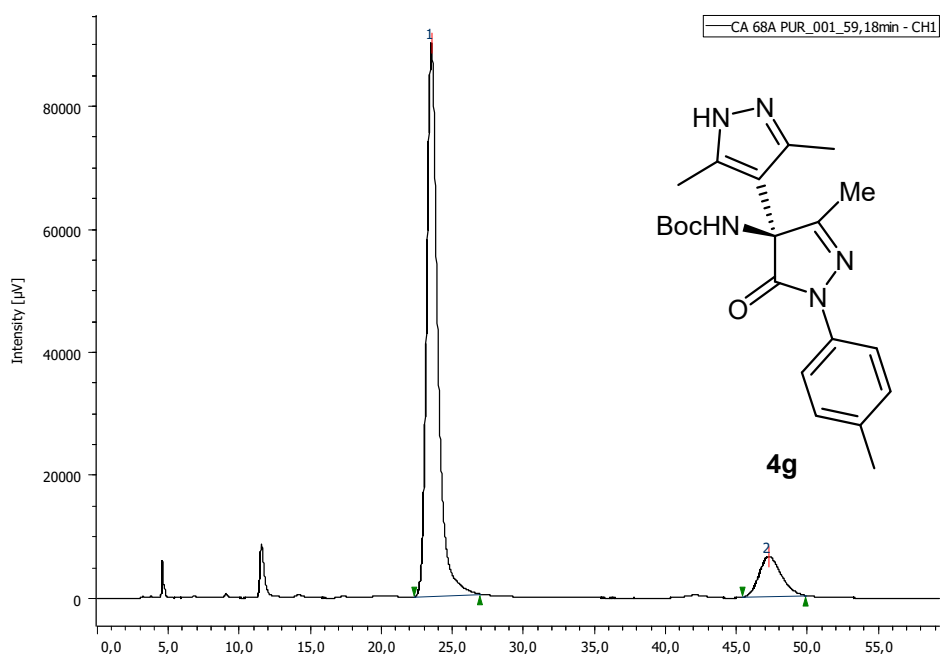

| Peak Number | tR     | Area    | Height | Area%  | Height% | Symmetry Factor |
|-------------|--------|---------|--------|--------|---------|-----------------|
| 1           | 23,492 | 4908020 | 89812  | 88,051 | 93,426  | 1,382           |
| 2           | 47,217 | 666014  | 6319   | 11,949 | 6,574   | 1,289           |

**Figure S89.** HPLC Profile for **4g** compound. Scheme 3, er 88:12.

***tert*-Butyl (S)-(3,5-diethyl-5'-oxo-1',3'-diphenyl-1',5'-dihydro-1*H*,4'*H*-[4,4'-bipyrazol]-4'-yl)carbamate (4j).**

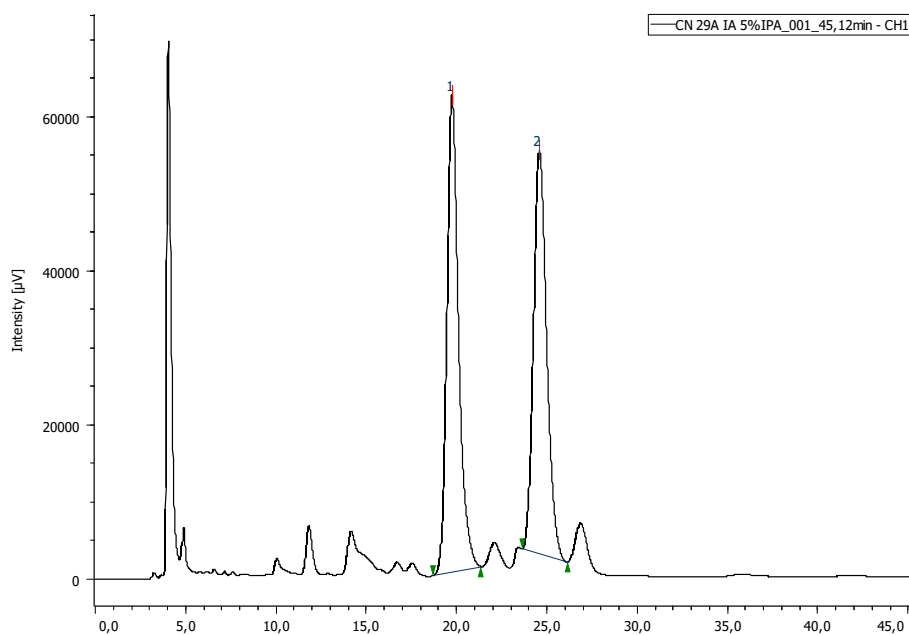

| Peak Number | tR     | Area    | Height | Area%  | Height% | Symmetry Factor |
|-------------|--------|---------|--------|--------|---------|-----------------|
| 1           | 19,725 | 276801  | 61716  | 51,125 | 54,161  | 1,299           |
| 2           | 24,550 | 2646161 | 52232  | 48,875 | 45,839  | 1,205           |

**Figure S90.** HPLC profile for **4j** (racemic).

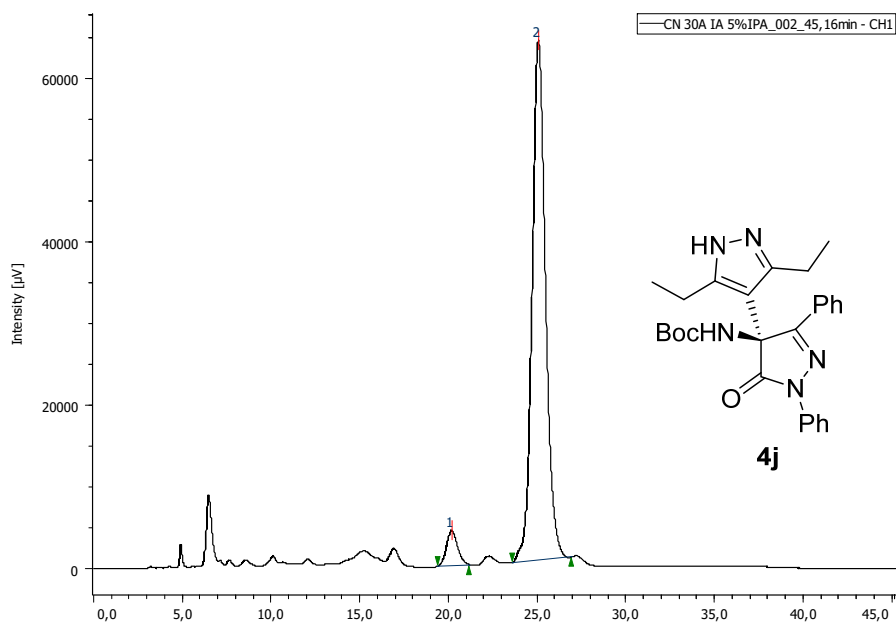

| Peak Number | tR     | Area    | Height | Area%  | Height% | Symmetry Factor |
|-------------|--------|---------|--------|--------|---------|-----------------|
| 1           | 20,158 | 185714  | 4311   | 5,273  | 6,349   | 1,125           |
| 2           | 25,042 | 3336290 | 63586  | 94,727 | 93,651  | 1,118           |

**Figure S91.** HPLC Profile for **4j** compound. Scheme 3, er 95:5.

***tert*-Butyl (S)-(3-methyl-5-oxo-4-(2-oxo-2-phenylethyl)-1-phenyl-4,5-dihydro-1*H*-pyrazol-4-yl)carbamate (**5i**).**

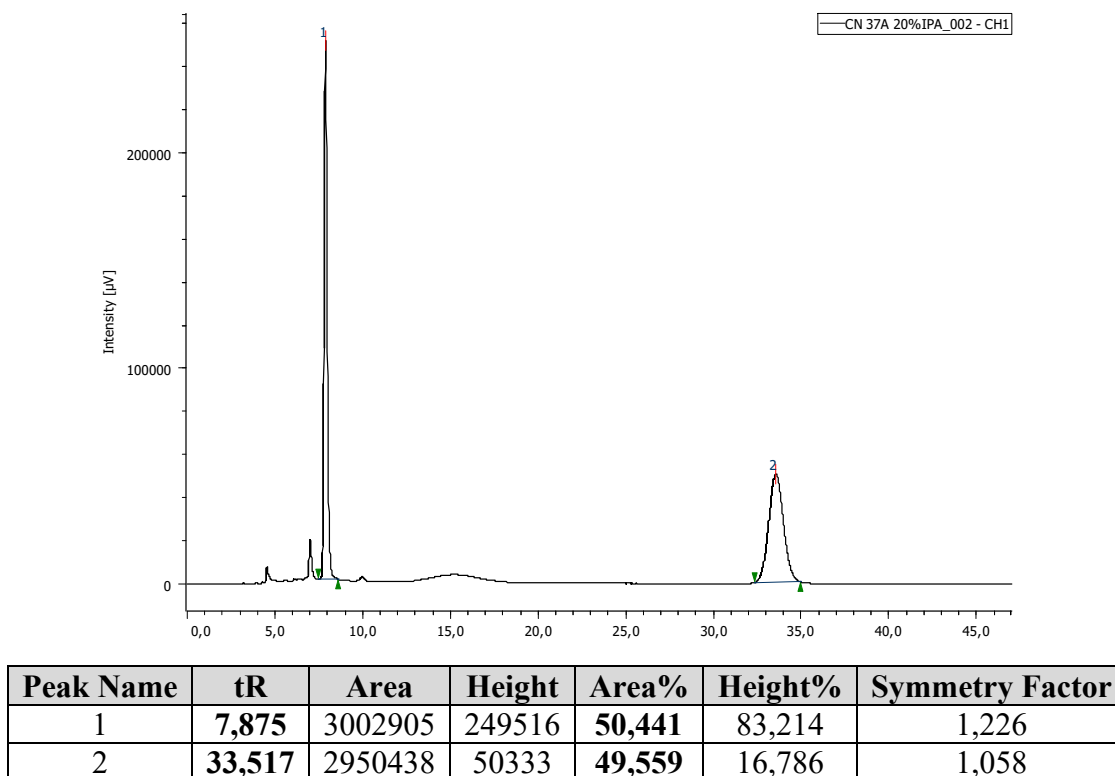

**Figure S92.** HPLC profile for **5i** (racemic).

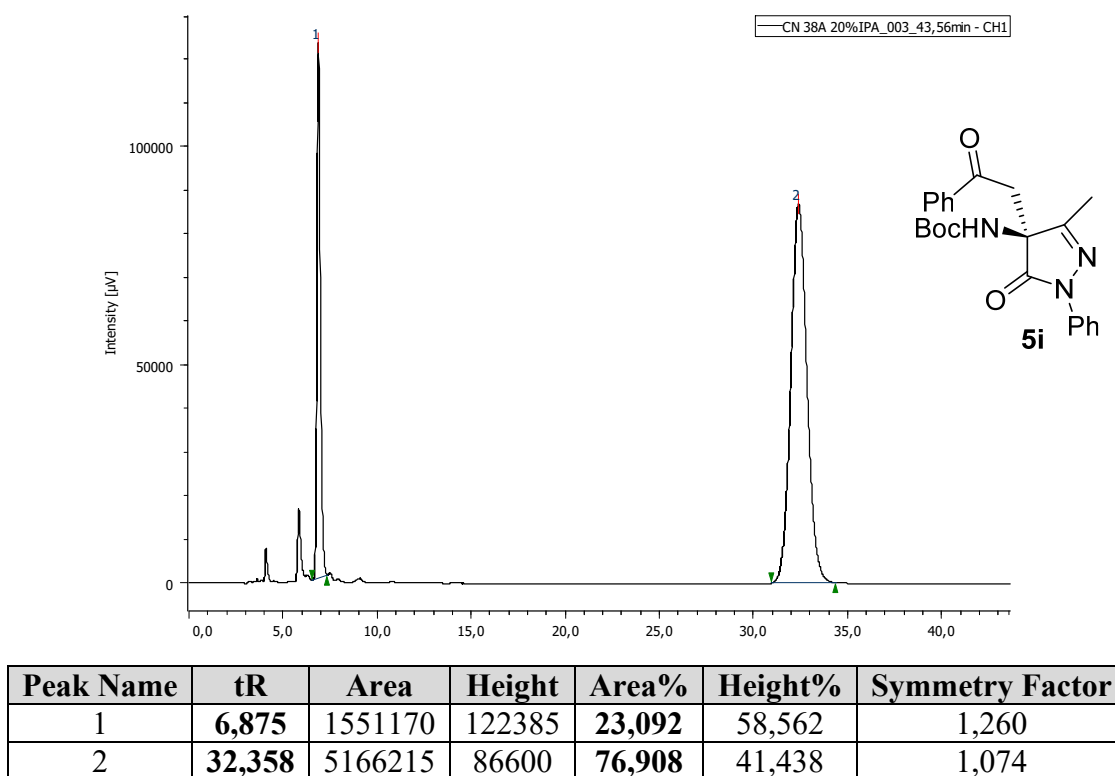

**Figure S93.** HPLC Profile for **5i** compound. Scheme 3, er 77:23.

***tert*-Butyl (S)-(1-(4-chlorophenyl)-3,3',5-trimethyl-5'-oxo-1'-phenyl-1',5'-dihydro-1*H*,4'*H*-[4,4'-bipyrazol]-4'-yl)carbamate (6a).**

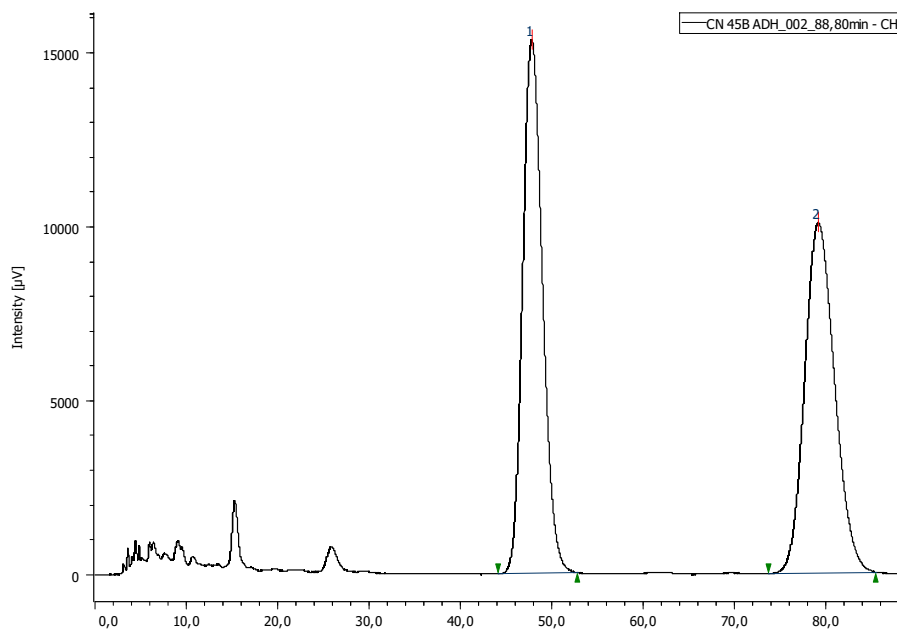

| Peak Number | tR     | Area    | Height | Area%  | Height% | Symmetry Factor |
|-------------|--------|---------|--------|--------|---------|-----------------|
| 1           | 47,758 | 2305688 | 15319  | 50,132 | 60,338  | 1,173           |
| 2           | 79,067 | 2293573 | 10070  | 49,868 | 39,662  | 1,157           |

**Figure S94.** HPLC profile for **6a** (racemic).

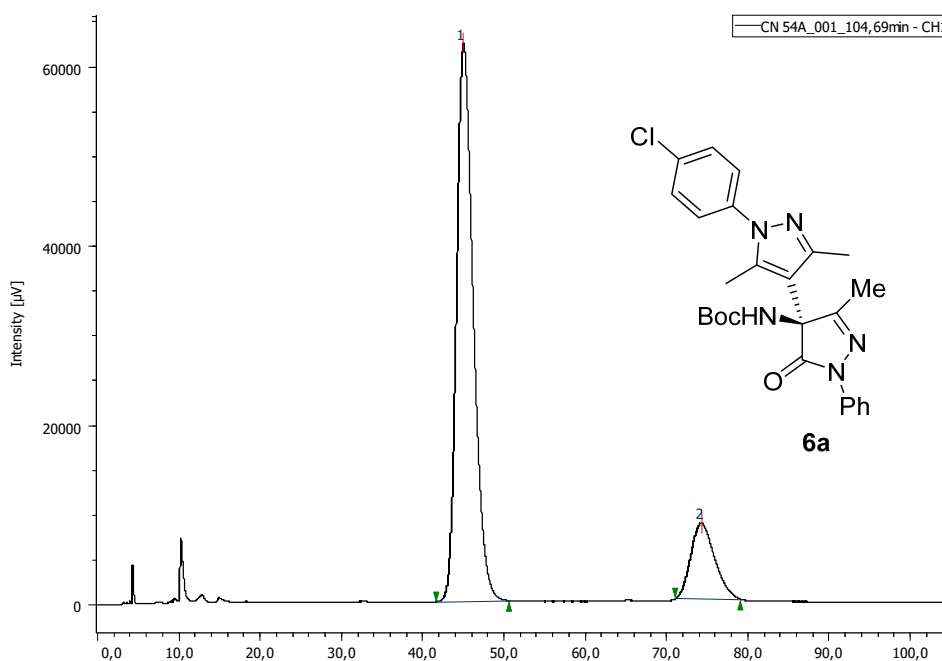

| Peak Number | tR     | Area    | Height | Area%  | Height% | Symmetry Factor |
|-------------|--------|---------|--------|--------|---------|-----------------|
| 1           | 44,967 | 8828181 | 62101  | 83,614 | 88,009  | 1,296           |
| 2           | 74,183 | 1730125 | 8461   | 16,386 | 11,991  | 1,217           |

**Figure S95.** HPLC Profile for **6a** compound. Scheme 5, er 84:16.

***tert*-Butyl (S)-(1-(4-chlorophenyl)-3,5-dimethyl-5'-oxo-1',3'-diphenyl-1',5'-dihydro-1*H*,4'*H*-[4,4'-bipyrazol]-4'-yl)carbamate (6e).**

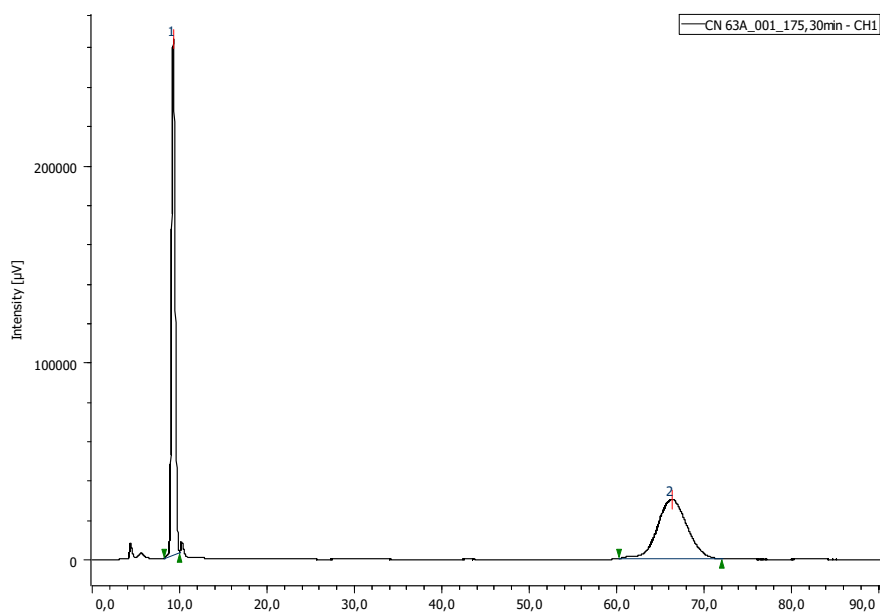

| Peak Number | tR     | Area    | Height | Area%  | Height% | Symmetry Factor |
|-------------|--------|---------|--------|--------|---------|-----------------|
| 1           | 9,275  | 7170915 | 261657 | 50,261 | 89,668  | 1,120           |
| 2           | 66,267 | 7096443 | 30149  | 49,739 | 10,332  | 1,008           |

**Figure S96.** HPLC profile for **6e** (racemic).

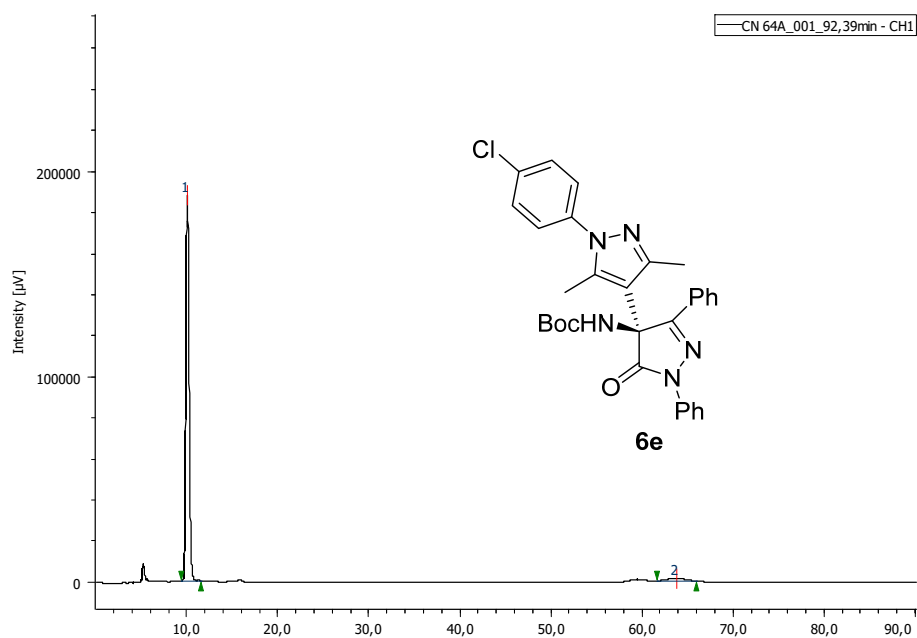

| Peak Number | tR     | Area    | Height | Area%  | Height% | Symmetry Factor |
|-------------|--------|---------|--------|--------|---------|-----------------|
| 1           | 10,075 | 4591426 | 187683 | 96,419 | 99,392  | 1,124           |
| 2           | 63,700 | 170512  | 1149   | 3,581  | 0,608   | 1,007           |

**Figure S97.** HPLC Profile for **6e** compound. Scheme 5, er 96:4.

***tert*-Butyl (S)-(4-(3,5-dimethylisoxazol-4-yl)-3-methyl-5-oxo-1-phenyl-4,5-dihydro-1H-pyrazol-4-yl)carbamate (7a).**

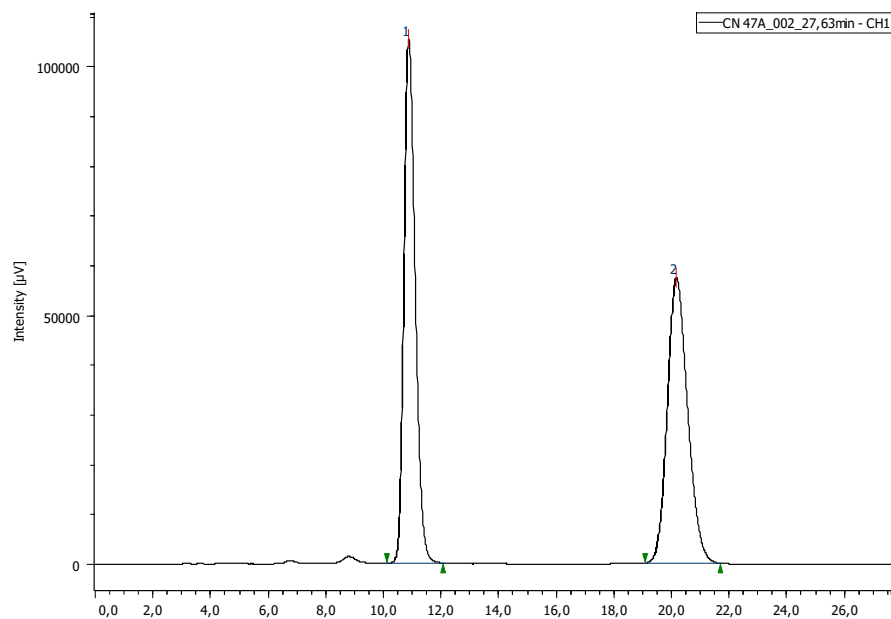

| Peak Number | tR     | Area    | Height | Area%  | Height% | Symmetry Factor |
|-------------|--------|---------|--------|--------|---------|-----------------|
| 1           | 10,867 | 2829567 | 105132 | 50,156 | 64,746  | 1,257           |
| 2           | 20,142 | 2811934 | 57245  | 49,844 | 35,254  | 1,182           |

**Figure S98.** HPLC profile for **7a** (racemic).

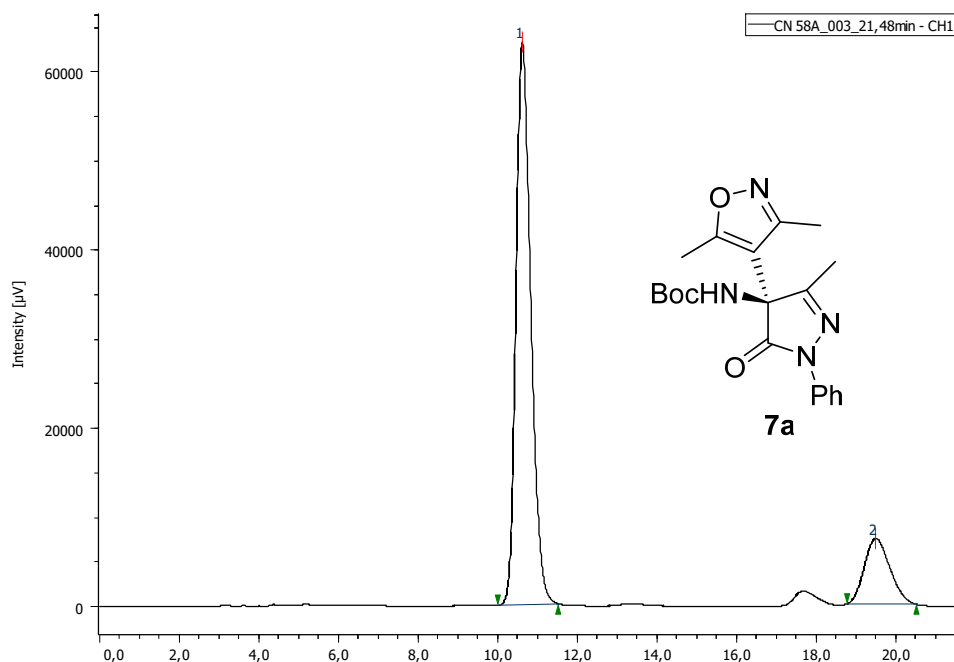

| Peak Number | tR     | Area    | Height | Area%  | Height% | Symmetry Factor |
|-------------|--------|---------|--------|--------|---------|-----------------|
| 1           | 10,608 | 1618696 | 63025  | 83,159 | 89,543  | 1,271           |
| 2           | 19,475 | 327817  | 7360   | 16,841 | 10,457  | 1,195           |

**Figure S99.** HPLC Profile for **7a** compound. Scheme 5, er 83:17.

***tert*-Butyl (S)-(4-(3,5-dimethylisoxazol-4-yl)-5-oxo-1,3-diphenyl-4,5-dihydro-1*H*-pyrazol-4-yl)carbamate (7e).**

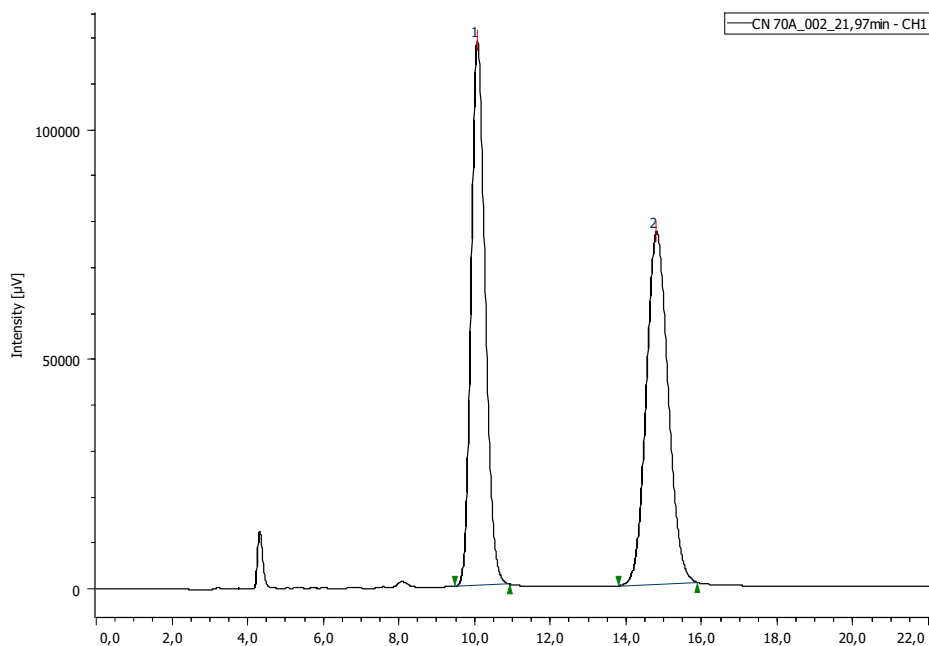

| Peak Number | tR     | Area    | Height | Area%  | Height% | Symmetry Factor |
|-------------|--------|---------|--------|--------|---------|-----------------|
| 1           | 10,067 | 3046066 | 118497 | 49,751 | 60,739  | 1,178           |
| 2           | 14,792 | 3076553 | 76594  | 50,249 | 39,261  | 1,099           |

**Figure S100.** HPLC profile for **7e** (racemic).

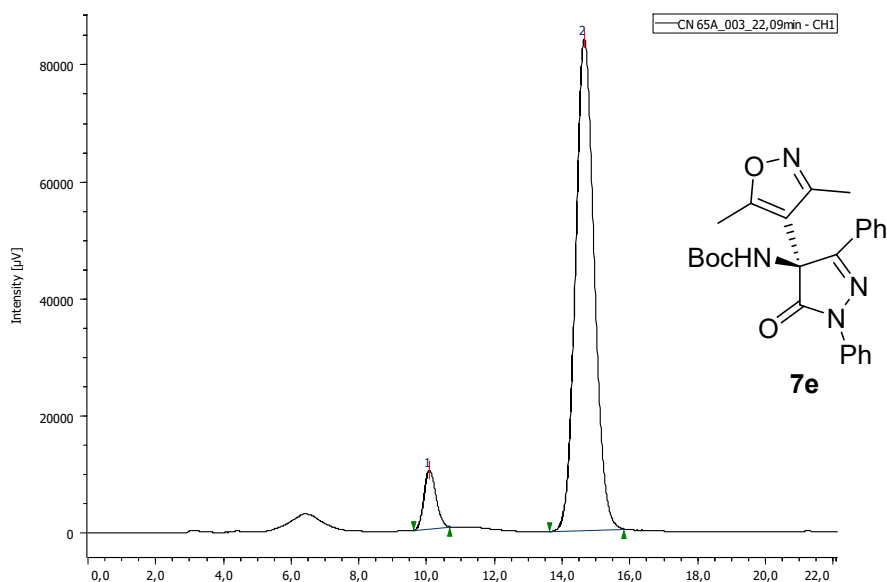

| Peak Number | tR     | Area    | Height | Area%  | Height% | Symmetry Factor |
|-------------|--------|---------|--------|--------|---------|-----------------|
| 1           | 10,075 | 246531  | 10010  | 7,067  | 10,659  | 1,139           |
| 2           | 14,633 | 3242092 | 83894  | 92,933 | 89,341  | 1,109           |

**Figure S101.** HPLC Profile for **7e** compound. Scheme 5, er 93:7.
